# Supplementary material for: Design, synthesis and application of bipyridine- N , N ′-dioxide catalysts in asymmetric synthesis of chiral cyclopropanes
Source: Royal Society of Chemistry journal article supplement (doi:10.1039/d4qo01532k), 2024-01-01
Supplement: d4qo01532k1.pdf [file d4qo01532k1.pdf]

## Supporting Information

### **Design, Synthesis and Application of Bipyridine-N,N'-dioxides Catalysts in Asymmetric Synthesis of Chiral Cyclopropanes**

Xiaoying Cao<sup>a</sup>, Xue Tian<sup>a</sup>, Minmin Liu<sup>a</sup>, Shi-Wu Li<sup>a</sup> \*

School of Chemistry and Chemical Engineering/State Key Laboratory Incubation  
Base for Green Processing of Chemical Engineering, Shihezi University, Shihezi,  
Xinjiang 832003, China.

E-mail: lishiwu@shzu.edu.cn

## Table of Contents

|             |                                                                   |            |
|-------------|-------------------------------------------------------------------|------------|
| <b>I</b>    | <b>General Information .....</b>                                  | <b>1</b>   |
| <b>II</b>   | <b>Synthesis of Ligands .....</b>                                 | <b>2</b>   |
| <b>III</b>  | <b>Optimization of Reaction Condition .....</b>                   | <b>6</b>   |
| <b>IV</b>   | <b>Synthesis of Substrates .....</b>                              | <b>8</b>   |
| <b>V</b>    | <b>Asymmetric Cycloaddition Reactions .....</b>                   | <b>11</b>  |
| <b>VI</b>   | <b>Gram-scale Experiments and Synthetic Transformations .....</b> | <b>29</b>  |
| <b>VII</b>  | <b>NMR Spectra .....</b>                                          | <b>32</b>  |
| <b>VIII</b> | <b>HPLC Traces on Chiral Stationary Phase .....</b>               | <b>77</b>  |
| <b>IX</b>   | <b>Single Crystal X-Ray Diffraction Studies .....</b>             | <b>109</b> |
| <b>X</b>    | <b>References .....</b>                                           | <b>111</b> |

## I General Information

Commercially available materials were used as received, unless otherwise noted, all reactions and manipulations involving air- or moisture-sensitive compounds were performed using standard Schlenk technique. Without special instructions, the heating reactions used are all using an oil bath. Reactions were checked by TLC analysis and plates were visualized with short-wave UV light (254 nm). The  $^1\text{H}$ ,  $^{13}\text{C}$  NMR and  $^{19}\text{F}$  spectra were obtained in  $\text{CDCl}_3$  &  $\text{CD}_3\text{OD}$  using a Bruker-BioSpin AVANCE III HD NMR spectrometer at 400 MHz, 101 MHz and 376 MHz respectively. Chemical shifts are reported in parts per million ( $\delta$  value) calibrated against the residual solvent peak. The determination of e.e. was performed via chiral HPLC analysis using Shimadzu LC-20A HPLC workstation. HPLC analysis of the compounds was done using chiralcel IC column using hexane and isopropanol as eluent, and the column temperature is 40 °C. The Rudolph Autopol V polarimeter was employed to gauge the optical rotation. The melting point was measured by Shanghai Instrument electrooptical SGW X-4A micro melting point instrument. High resolution mass spectra(HRMS) were recorded on Thermo Scientific Q Exactive mass spectrometry equipped with an APCI source. Crystal structure data was collected on a SuperNova, Dual, Cu at zero, Atlas diffractometer. The following abbreviations are used to designate chemical shift multiplicities: s = singlet, d = doublet, t = triplet, q = quartet, m = multiplet.

## II Synthesis of Ligands

### 1 General procedure L6 for synthesis of hiral Bipyridine-N,N'-dioxides Catalysts.<sup>1-3</sup>

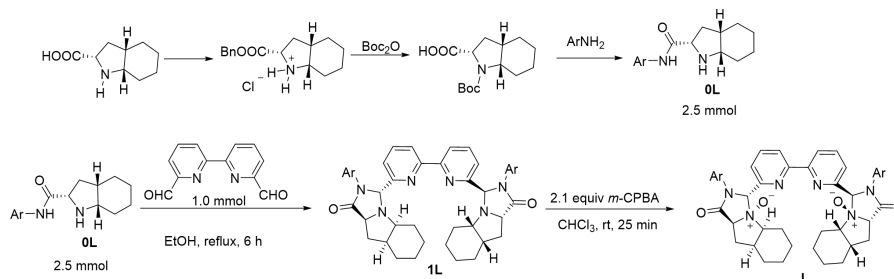

The synthesis of compound amide **0L** was referred to Reference 1. In a sealed tube equipped with a magnetic stirring bar, [2,2'-bipyridine]-6,6'-dicarbaldehyde (1.0 mmol) and **0L** (2.5 mmol, 2.5 equiv.) were added. Then, anhydrous ethanol (6.0 mL) was added and the reaction was heated with stirring at reflux for 6 h. After completion of the reaction, as indicated by TLC, the aftertreatment residue was purified by flash column chromatography to give the intermediate **1L**. Then, the intermediate and *m*-chloroperoxybenzoic acid (2.1 equiv.) was added to the reaction tube, and an appropriate amount of trichloromethane was added to dissolve the reaction system. After stirring at room temperature for 25 minutes, the reaction liquid was treated and purified by column chromatography (200-300 mesh, EtOAc/MeOH v/v = 20:1-10:1 as the eluent) to obtain a white solid **L**.

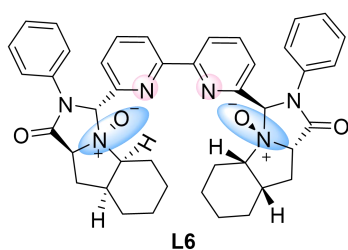

**L6**: White solid (783.1 mg, 45% yield); >20:1 dr; mp 168.6-170.2 °C. <sup>1</sup>H NMR (400 MHz, CD<sub>3</sub>OD) δ = 8.30 (d, *J* = 7.9 Hz, 2H), 7.88 (t, *J* = 7.8 Hz, 2H), 7.63 (d, *J* = 7.6 Hz, 2H), 7.37 (d, *J* = 8.1 Hz, 3H), 7.17 (t, *J* = 7.9 Hz, 4H), 7.04 (t, *J* = 7.4 Hz, 2H), 6.90 (s, 2H), 4.76 (dd, *J* = 10.3, 6.1 Hz, 2H), 3.89 (dt, *J* = 11.8, 5.4 Hz, 2H), 3.33 (p, *J* = 6.1 Hz, 2H), 2.47 (ddd, *J* = 12.8, 10.2, 8.2 Hz, 2H), 2.29 (td, *J* = 12.8, 6.2 Hz, 3H), 1.83 (d, *J* = 3.5 Hz, 1H), 1.79 (s, 2H), 1.76 – 1.62 (m, 3H), 1.52 – 1.47 (m, 2H), 1.46



– 1.23 (m, 4H), 1.23 – 1.08 (m, 3H).  $^{13}\text{C}$  NMR (101 MHz,  $\text{CD}_3\text{OD}$ )  $\delta$  = 170.96, 156.52, 152.54, 139.19, 136.33, 130.34, 128.30, 127.79, 123.35, 122.79, 85.72, 85.62, 77.30, 37.02, 28.64, 25.86, 25.42, 25.13, 21.11. HRMS (APCI)  $m/z$  calcd for  $\text{C}_{42}\text{H}_{45}\text{N}_6\text{O}_4^+(\text{M}+\text{H})^+$ : 697.3497, found 697.3461.

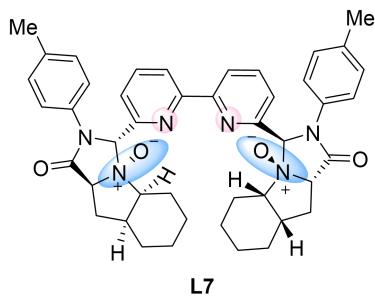

**L7:** White solid (796.9 mg, 44% yield); >20:1 dr; mp 202.6-204.2 °C.  $^1\text{H}$  NMR (400 MHz,  $\text{CD}_3\text{OD}$ )  $\delta$  = 8.32 (d,  $J$  = 7.9 Hz, 2H), 7.89 (t,  $J$  = 7.8 Hz, 2H), 7.61 (d,  $J$  = 7.6 Hz, 2H), 7.22 (d,  $J$  = 8.3 Hz, 4H), 6.93 (d,  $J$  = 8.2 Hz, 4H), 6.86 (s, 2H), 4.76 (dd,  $J$  = 10.3, 6.1 Hz, 2H), 3.89 (dt,  $J$  = 11.8, 5.3 Hz, 2H), 3.39 – 3.26 (m, 2H), 2.50 – 2.43 (m, 2H), 2.38 – 2.23 (m, 4H), 2.05 (s, 6H), 1.88 – 1.64 (m, 6H), 1.56 – 1.39 (m, 4H), 1.39 – 1.26 (m, 2H), 1.20 (t,  $J$  = 12.9 Hz, 2H).  $^{13}\text{C}$  NMR (101 MHz,  $\text{CD}_3\text{OD}$ )  $\delta$  = 170.89, 156.54, 152.58, 139.16, 137.98, 133.71, 130.78, 128.30, 123.44, 122.75, 85.79, 85.69, 77.34, 37.05, 28.60, 25.90, 25.43, 25.15, 21.13, 20.88. HRMS (APCI)  $m/z$  calcd for  $\text{C}_{44}\text{H}_{49}\text{N}_6\text{O}_4^+(\text{M}+\text{H})^+$ : 725.3810, found 725.3798.

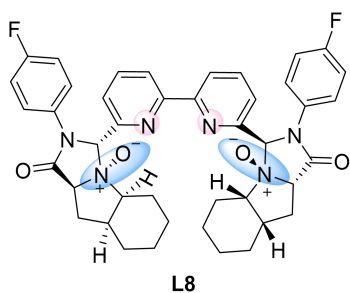

**L8:** White solid (768.9 mg, 42% yield); >20:1 dr; mp 179.7-181.3 °C.  $^1\text{H}$  NMR (400 MHz,  $\text{CD}_3\text{OD}$ )  $\delta$  = 8.32 (d,  $J$  = 7.9 Hz, 2H), 7.92 (t,  $J$  = 7.8 Hz, 2H), 7.63 (d,  $J$  = 7.6 Hz, 2H), 7.39 (dd,  $J$  = 8.9, 4.7 Hz, 4H), 6.93 (t,  $J$  = 8.6 Hz, 4H), 6.89 (s, 2H), 4.77 (dd,  $J$  = 10.3, 6.1 Hz, 2H), 3.91 (dt,  $J$  = 12.0, 5.4 Hz, 2H), 3.41 – 3.29 (m, 2H), 2.49 (dt,  $J$  = 12.6, 9.1 Hz, 2H), 2.40 – 2.24 (m, 4H), 1.87 – 1.68 (m, 6H), 1.57 – 1.45 (m, 4H), 1.35 (d,  $J$  = 13.3 Hz, 2H), 1.21 (d,  $J$  = 12.8 Hz, 2H).  $^{13}\text{C}$  NMR (101 MHz,  $\text{CD}_3\text{OD}$ )  $\delta$

=170.98, 163.28, 160.83, 156.53, 152.36, 139.29, 132.44, 128.45, 125.90, 125.81, 122.85, 117.17, 116.94, 85.75, 77.20, 37.05, 28.58, 25.88, 25.41, 25.16, 21.11.  $^{19}\text{F}$  NMR (376 MHz,  $\text{CD}_3\text{OD}$ )  $\delta$  = 116.02. HRMS (APCI)  $m/z$  calcd for  $\text{C}_{42}\text{H}_{43}\text{F}_2\text{N}_6\text{O}_4^+(\text{M}+\text{H})^+$ : 733.3308, found 733.3295.

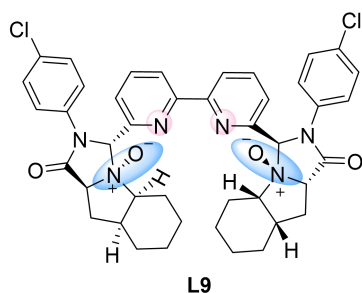

**L9:** White solid (802.5 mg, 42% yield); >20:1 dr; mp 158.3-159.9 °C.  $^1\text{H}$  NMR (400 MHz,  $\text{CD}_3\text{OD}$ )  $\delta$  = 8.29 (d,  $J$  = 7.9 Hz, 2H), 7.92 (t,  $J$  = 7.8 Hz, 2H), 7.65 (d,  $J$  = 7.6 Hz, 2H), 7.36 (d,  $J$  = 8.5 Hz, 4H), 7.08 (d,  $J$  = 8.5 Hz, 4H), 6.90 (s, 2H), 4.74 (dd,  $J$  = 10.3, 6.1 Hz, 2H), 3.89 (dt,  $J$  = 11.9, 5.3 Hz, 2H), 3.37 – 3.28 (m, 2H), 2.48 (dt,  $J$  = 12.6, 9.1 Hz, 2H), 2.30 – 2.25 (m, 4H), 1.84 – 1.69 (m, 6H), 1.49 (d,  $J$  = 14.4 Hz, 2H), 1.41 (dd,  $J$  = 12.8, 2.9 Hz, 2H), 1.38 – 1.29 (m, 2H), 1.19 (t,  $J$  = 12.9 Hz, 2H).  $^{13}\text{C}$  NMR (101 MHz,  $\text{CD}_3\text{OD}$ )  $\delta$  = 170.91, 156.53, 152.27, 139.28, 135.03, 132.81, 130.29, 128.47, 124.46, 122.92, 85.76, 85.26, 77.18, 37.01, 28.67, 25.85, 25.36, 25.13, 21.11. HRMS (APCI)  $m/z$  calcd for  $\text{C}_{42}\text{H}_{43}\text{Cl}_2\text{N}_6\text{O}_4^+(\text{M}+\text{H})^+$  : 765.2717, found 765.2709.

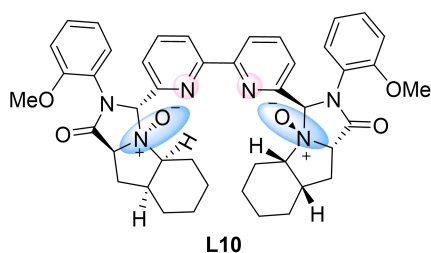

**L10:** White solid (716.7 mg, 38% yield); >20:1 dr; mp 184.2-185.8 °C.  $^1\text{H}$  NMR (400 MHz,  $\text{CD}_3\text{OD}$ )  $\delta$  = 8.38 (d,  $J$  = 7.9 Hz, 2H), 7.87 (t,  $J$  = 7.8 Hz, 2H), 7.49 (d,  $J$  = 7.6 Hz, 2H), 7.17 – 7.12 (m, 2H), 7.07 – 7.02 (m, 2H), 6.97 (d,  $J$  = 8.4 Hz, 2H), 6.80 (s, 2H), 6.60 (t,  $J$  = 7.7 Hz, 2H), 3.93 (dt,  $J$  = 11.9, 5.5 Hz, 2H), 3.80 (s, 6H), 3.39 – 3.31 (m, 2H), 2.63 (d,  $J$  = 12.6 Hz, 2H), 2.50 – 2.40 (m, 2H), 2.28 (td,  $J$  = 12.6, 6.5 Hz, 2H), 1.99 – 1.83 (m, 5H), 1.80 – 1.71 (m, 2H), 1.63 – 1.52 (m, 4H), 1.41 – 1.23 (m,

5H).  $^{13}\text{C}$  NMR (101 MHz,  $\text{CD}_3\text{OD}$ )  $\delta$  = 171.51, 156.44, 155.66, 152.48, 139.05, 130.73, 130.03, 128.15, 123.76, 122.52, 121.55, 113.31, 85.91, 85.71, 77.04, 56.14, 37.06, 28.09, 26.04, 25.42, 25.24, 20.99. HRMS (APCI)  $m/z$  calcd for  $\text{C}_{44}\text{H}_{49}\text{N}_6\text{O}_6^+$  ( $\text{M}+\text{H}$ ) $^+$ : 757.3708, found 757.3692.

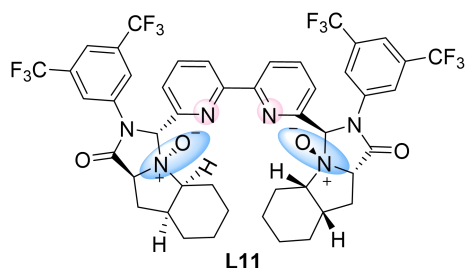

**L11**: White solid (847.3 mg, 35% yield); >20:1 dr; mp 145.4-147.0 °C.  $^1\text{H}$  NMR (400 MHz,  $\text{CD}_3\text{OD}$ )  $\delta$  = 8.27 (d,  $J$  = 8.0 Hz, 2H), 8.03 (s, 4H), 7.98 (t,  $J$  = 7.7 Hz, 2H), 7.72 (d,  $J$  = 7.6 Hz, 2H), 7.51 (s, 2H), 7.20 (s, 2H), 4.78 (dd,  $J$  = 10.3, 6.2 Hz, 2H), 3.94 (dt,  $J$  = 12.0, 5.4 Hz, 2H), 3.41 – 3.32 (m, 2H), 2.54 (dt,  $J$  = 12.5, 8.9 Hz, 2H), 2.40 – 2.28 (m, 4H), 1.88 – 1.71 (m, 6H), 1.53 (d,  $J$  = 13.6 Hz, 2H), 1.47 – 1.35 (m, 4H), 1.23 (t,  $J$  = 12.8 Hz, 2H).  $^{13}\text{C}$  NMR (101 MHz,  $\text{CD}_3\text{OD}$ )  $\delta$  = 171.51, 156.46, 151.52, 139.49, 138.31, 133.70, 133.37, 128.84, 125.40, 122.95, 122.69, 122.60, 120.32, 85.97, 84.66, 77.08, 37.07, 28.71, 25.82, 25.21, 25.12, 21.03.  $^{19}\text{F}$  NMR (376 MHz,  $\text{CD}_3\text{OD}$ )  $\delta$  = 64.7. HRMS (APCI)  $m/z$  calcd for  $\text{C}_{46}\text{H}_{41}\text{F}_{12}\text{N}_6\text{O}_4^+$  ( $\text{M}+\text{H}$ ) $^+$ : 969.2992, found 969.2972.

### III Optimization of Reaction Conditions<sup>a</sup>

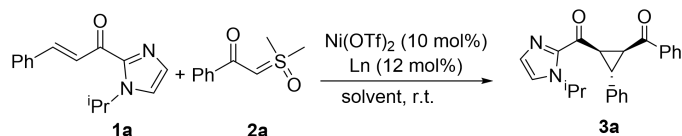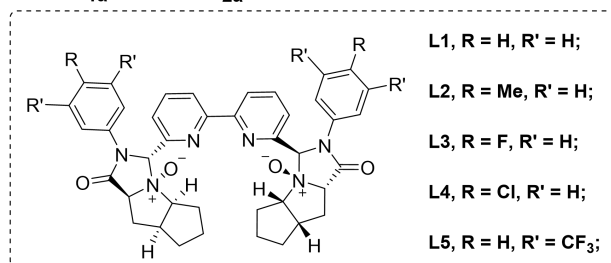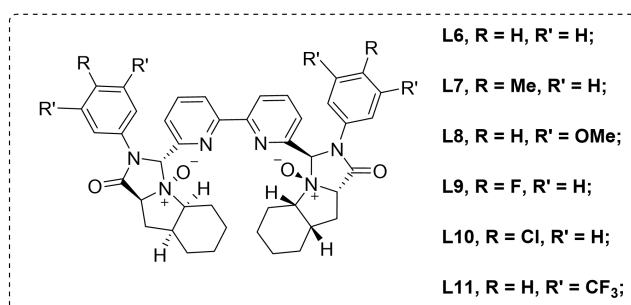

| Entry           | Ligand | Solvent            | Yield(%) <sup>b</sup> | Ee(%) <sup>c</sup> | Dr <sup>d</sup> |
|-----------------|--------|--------------------|-----------------------|--------------------|-----------------|
| 1               | L1     | DCM                | 88                    | 52                 | >20:1           |
| 2               | L2     | DCM                | 90                    | 24                 | >20:1           |
| 3               | L3     | DCM                | 91                    | 48                 | >20:1           |
| 4               | L4     | DCM                | 85                    | 40                 | >20:1           |
| 5               | L5     | DCM                | 84                    | 6                  | >20:1           |
| 6               | L6     | DCM                | 95                    | 86                 | >20:1           |
| 7               | L7     | DCM                | 90                    | 89                 | >20:1           |
| 8               | L8     | DCM                | 90                    | 57                 | >20:1           |
| 9               | L9     | DCM                | 92                    | 83                 | >20:1           |
| 10              | L10    | DCM                | 93                    | 86                 | >20:1           |
| 11              | L11    | DCM                | 94                    | 33                 | >20:1           |
| 12              | L7     | DCE                | 94                    | 82                 | >20:1           |
| 13              | L7     | CHCl <sub>3</sub>  | 92                    | 52                 | >20:1           |
| 14              | L7     | THF                | 95                    | 85                 | >20:1           |
| 15              | L7     | CH <sub>3</sub> CN | 96                    | 88                 | >20:1           |
| 16              | L7     | Acetone            | 96                    | 91                 | >20:1           |
| 17              | L7     | CB                 | 94                    | 33                 | >20:1           |
| 18              | L7     | MeOH               | 80                    | 10                 | >20:1           |
| 19              | L7     | EtOH               | 86                    | 43                 | >20:1           |
| 20              | L7     | Butanone           | 94                    | 90                 | >20:1           |
| 21              | L7     | NMP                | -                     | -                  | -               |
| 22 <sup>d</sup> | L7     | Acetone            | 87                    | 89                 | >20:1           |
| 23 <sup>e</sup> | L7     | Acetone            | 79                    | 91                 | >20:1           |

24<sup>f</sup>      L7      Acetone      86      85      >20:1

---

<sup>a</sup>Reaction conditions: Ni(OTf)<sub>2</sub> (10 mol%), **L1-L11** (12 mol%), **1a** (0.10 mmol), and **2a** (0.12 mmol) in 2.0 mL of Acetone at 25 °C. <sup>b</sup>Isolated yield after flash chromatography. <sup>c</sup>Determined by HPLC analysis <sup>d</sup>Determined by <sup>1</sup>H NMR analysis. <sup>d</sup>Ni(ClO<sub>4</sub>)<sub>2</sub>·6H<sub>2</sub>O (10 mol%). <sup>e</sup>Cu(OTf)<sub>2</sub> (10 mol%). <sup>f</sup>Zn(OTf)<sub>2</sub> (10 mol%). <sup>d</sup>Ni(ClO<sub>4</sub>)<sub>2</sub>·6H<sub>2</sub>O (10 mol%). <sup>e</sup>Cu(OTf)<sub>2</sub> (10 mol%). <sup>f</sup>Zn(OTf)<sub>2</sub> (10 mol%).

## IV Synthesis of Substrates

### 4-1 Synthesis of Compounds 1( $\alpha,\beta$ -unsaturated 2-acylimidazoles)<sup>4</sup>

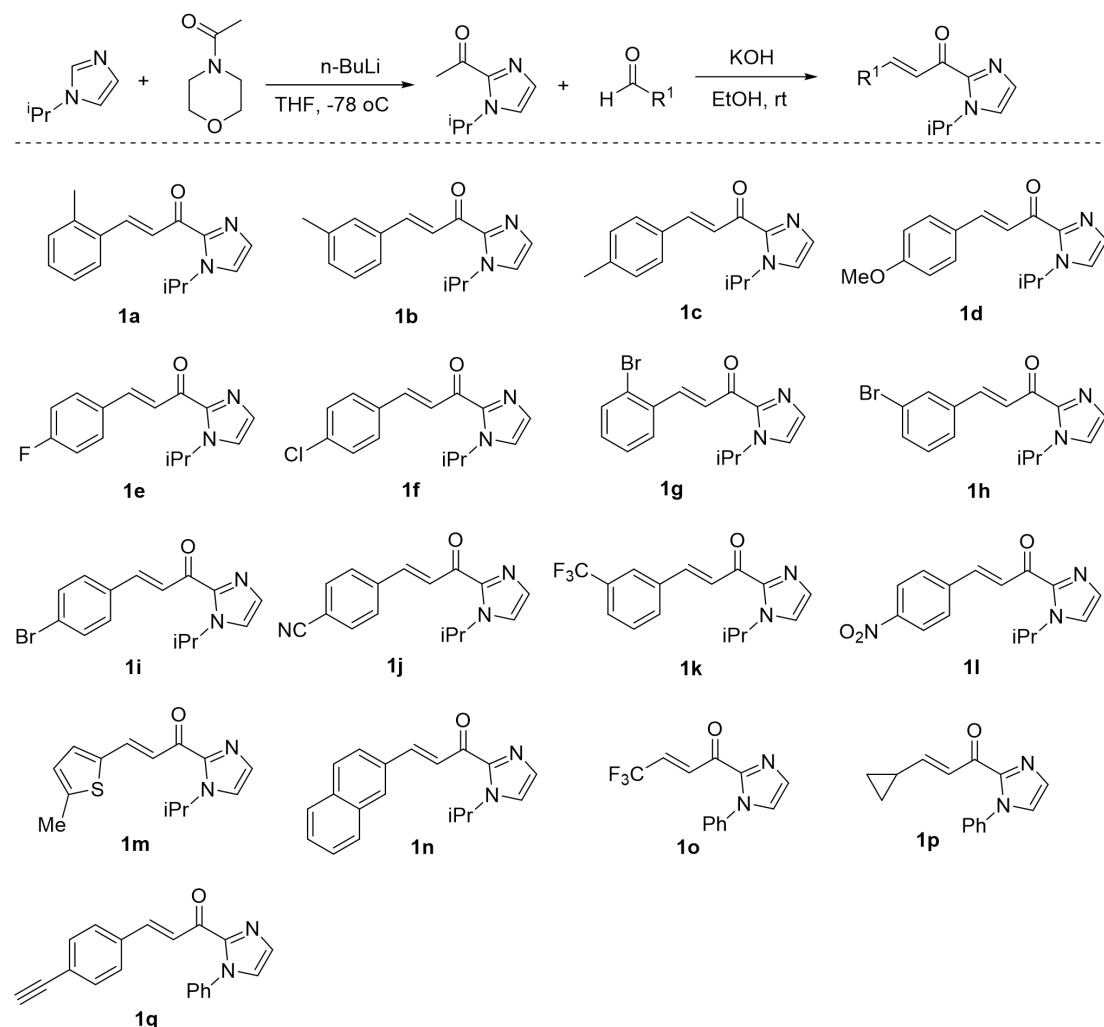

$\alpha,\beta$ -unsaturated 2-acylimidazoles **1a-1n**, **1q** were prepared according to a reported procedure. Accordingly, 2-acetyl-imidazole (10.0 mmol, 1.0 equiv.) and EtOH (20 mL) were added to a 50 mL a round-bottom flask followed by the aromatic aldehyde (10.5 mmol, 1.05 equiv.) and NaOH (11.0 mmol, 1.1 equiv.). The solution was stirred until the substrates consumption (detected by TLC). Saturated NaCl (30 mL) and H<sub>2</sub>O (10 mL) were added and the mixture was extracted with CH<sub>2</sub>Cl<sub>2</sub> (3 × 30 mL). The combined organic layers were dried over Na<sub>2</sub>SO<sub>4</sub>, filtered and concentrated. The resulting residue was purified by a flash column chromatography on silica gel to give the desired products.

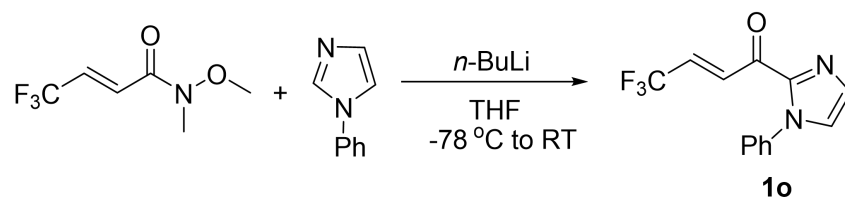

Following the general procedure<sup>6</sup>, to a suitable vacuum flame-dried flask under N<sub>2</sub> was added N-benzylimidazole (1.44 g, 0.01 mol, 1.0 equiv.) to 30 mL THF. The flask was cooled to -78 °C for 20-30 min before a titrated 10 mL *n*-butyllithium (2.5 M in hexanes) (1.5 equiv.) was added in drops to the flask. The reaction was stirred at -78 °C for about 5 minutes. The bath was removed and the reaction was allowed to warm to r.t. over a 30 minutes period. The reaction was cooled back down to -78 °C for 20 minutes before the corresponding Weinreb amide (1.0 equiv.) was added to the solution in THF. The reaction was stirred at -78 °C for 2 h. The reaction was quenched with water and then extracted with EtOAc for three times. The organic layer was washed with brine, and dried with Na<sub>2</sub>SO<sub>4</sub>. The drying agent was concentrated and directly purified by silica gel column chromatography (with ethyl acetate-petroleum ether as the eluent) to afford the desired products **1o**.

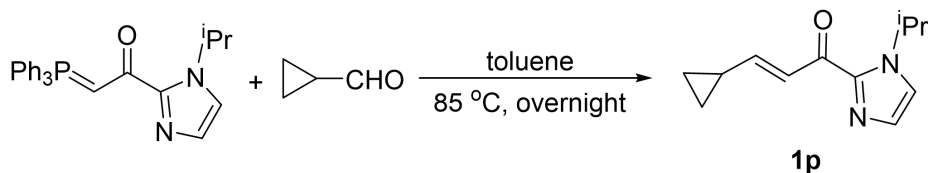

Following the general procedure<sup>5</sup>, to a solution of Wittig reagent (1.03 g, 2.5 mmol) in toluene (12.6 mL) at room temperature was added cyclopropanecarboxaldehyde (350.5 mg, 5.0 mmol). The reaction was stirred at 85 °C overnight. After the solvent was removed in vacuo, the residue was purified by flash chromatography on silica gel (EtOAc/hexane = 1/5 to 1/3) to produce the unsaturated alkenes as a mixture of *E*:*Z* isomers. Then, to a solution of purified alkene in CH<sub>2</sub>Cl<sub>2</sub> (0.2 M) at room temperature was added DMAP (30.5 mg, 0.25 mmol). The reaction was sealed and stored at 4 °C (fridge) for 24 hours. After isomerization, the solution was passed through a short silica column to afford **1p** as colorless oil (306.4 mg, yield: 60%).

#### 4-2 synthesis of Compounds 2 ( sulfoxonium ylides).<sup>7</sup>

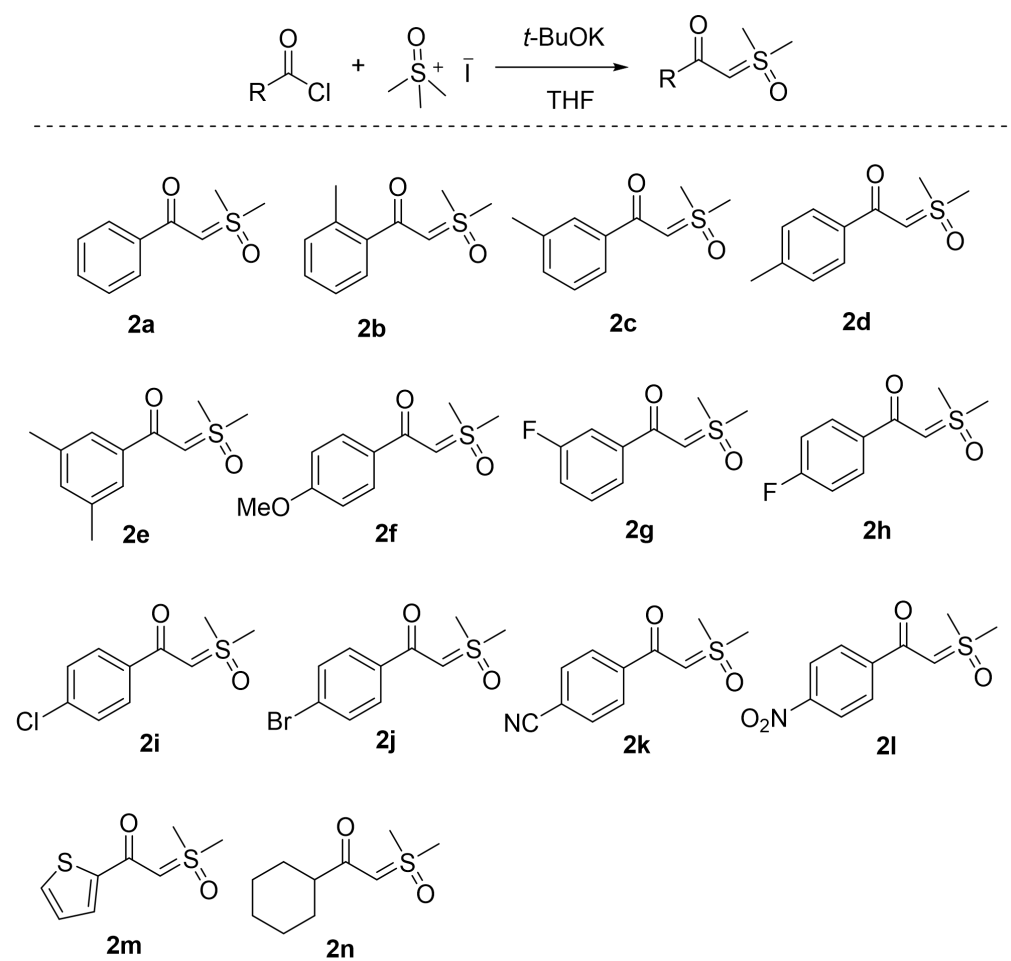

All the sulfoxonium ylides are known and the synthesis method is as follows. Potassium tert-butoxide (27.2 mmol, 3 g, 4.0 equiv.) and anhydrous THF (27.0 mL) were added to a 100 mL Schlenk tube under argon atmosphere. Then, trimethylsulfoxonium iodide (20.4 mmol, 4.48 g, 3.0 equiv.) was added in one portion. The suspension was heated at reflux(oil bath) for 3 hours. After that, the mixture was cooled to 0 °C, followed by slow addition of the acyl chloride (6.8 mmol, 1.0 equiv.). The mixture was stirred overnight at room temperature. The solvent was removed on a rotary evaporator. Then 80 mL H<sub>2</sub>O was added and the mixture was extracted with DCM ( 8 ×20 mL). The organic phase was combined and dried over Na<sub>2</sub>SO<sub>4</sub>. The crude product was concentrated on a rotary evaporator and purified by flash column chromatography on silica gel ( 200-300 mesh, MeOH/EA v/v = 1:15 - 1:10) to afford the desired product (**2a-2n**).



## V Asymmetric Cycloaddition Reactions

**General Procedure:** fitted with a magnetic stirring bar, was charged with Ni(OTf)<sub>2</sub> (3.6 mg, 10 mol%) in an Ar setting, followed by the addition of **L7** (8.0 mg, 12 mol%) and Acetone (1.0 mL, 0.1 M), with the mixture being stirred at room temperature for an hour. Following this, **1** (0.10 mmol, 1.0 equiv.) and **2** (0.12 mmol, 1.2 equiv.) were added. The reaction mixture was stirred at 25 °C for indicated time (monitored by TLC) under argon. The mixture was purified by flash column chromatography on silica gel (petroleum ether/ EtOAc = 10:1 to 5:1) to afford chiral products.

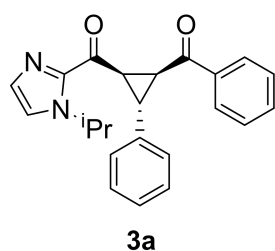

**(1R,2S,3S)-2-benzoyl-3-phenylcyclopropyl-(1-isopropyl-1H-imidazol-2-yl)methanone (3a).** pale yellow oil (34.4 mg, 96% yield). HPLC: 91% ee (Chiralpak IC column,  $\lambda = 254$  nm, n-hexane/i-PrOH = 80:20, flow rate: 1.0 mL/min, 40 °C, tr (major) = 7.64 min, tr (minor) = 6.87 min.  $[\alpha]_D^{26} = +7.0$  (c = 0.1, CH<sub>2</sub>Cl<sub>2</sub>). <sup>1</sup>H NMR (400 MHz, CDCl<sub>3</sub>)  $\delta = 7.29$  (t,  $J = 7.3$  Hz, 2H), 7.24 (dd,  $J = 10.4, 1.3$  Hz, 2H), 7.22 – 7.18 (m, 4H), 7.17 (d,  $J = 1.1$  Hz, 1H), 7.16 – 7.09 (m, 3H), 5.52 (p,  $J = 6.7$  Hz, 1H), 3.82 (dd,  $J = 9.7, 6.3$  Hz, 1H), 3.38 (t,  $J = 6.3$  Hz, 1H), 2.84 (d,  $J = 2.5$  Hz, 1H), 1.42 (dd,  $J = 6.8, 1.6$  Hz, 6H). <sup>13</sup>C NMR (101 MHz, CDCl<sub>3</sub>)  $\delta = 204.24, 186.23, 142.70, 141.01, 138.53, 129.91, 128.64, 128.44, 128.32, 126.97, 126.57, 126.03, 49.32, 45.22, 40.33, 37.33, 30.70, 29.65, 23.69, 23.52$ . HRMS (APCI) m/z calcd for C<sub>23</sub>H<sub>23</sub>N<sub>2</sub>O<sub>2</sub><sup>+</sup> (M+H)<sup>+</sup>: 359.1766, found 359.1761.

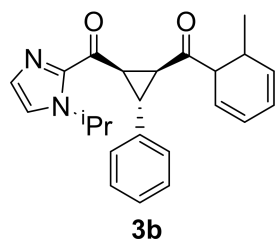

**(1R,2S,3S)-2-(6-methylcyclohexa-2,4-diene-1-carbonyl)-3-phenylcyclopropyl-(1-isopropyl-1H-imidazol-2-yl)methanone (3b).** yellow oil (35.7 mg, 95% yield). HPLC:

92% ee (Chiralpak IA column,  $\lambda = 254$  nm, n-hexane/i-PrOH = 80:20, flow rate: 1.0 mL/min, 40 °C, tr (major) = 7.84 min, tr (minor) = 5.7 min.  $[\alpha]_{\text{D}}^{26} = +6.2$  (c = 0.1, CH<sub>2</sub>Cl<sub>2</sub>). <sup>1</sup>H NMR (400 MHz, CDCl<sub>3</sub>)  $\delta = 7.48$  (d,  $J = 7.1$  Hz, 2H), 7.35 (t,  $J = 7.5$  Hz, 2H), 7.27 (d,  $J = 8.9$  Hz, 1H), 7.21 – 7.15 (m, 3H), 7.00 (s, 2H), 5.83 (s, 1H), 5.15 – 5.09 (m, 1H), 5.01 (p,  $J = 6.7$  Hz, 1H), 4.85 (s, 1H), 3.25 (d,  $J = 15.0$  Hz, 1H), 3.07 (s, 1H), 2.61 (ddd,  $J = 15.3, 9.5, 5.3$  Hz, 1H), 2.39 (s, 1H), 1.31 (d,  $J = 6.7$  Hz, 3H), 0.83 (d,  $J = 6.7$  Hz, 3H). <sup>13</sup>C NMR (101 MHz, CDCl<sub>3</sub>)  $\delta = 197.58, 185.99, 142.91, 138.85, 138.75, 137.70, 131.86, 131.52, 129.88, 129.66, 128.74, 127.02, 126.70, 125.62, 121.27, 47.93, 42.14, 38.88, 32.38, 23.63, 23.51, 21.16$ . HRMS (APCI) m/z calcd for C<sub>24</sub>H<sub>27</sub>N<sub>2</sub>O<sub>2</sub><sup>+</sup> (M+H)<sup>+</sup>: 375.2023, found 375.2017.

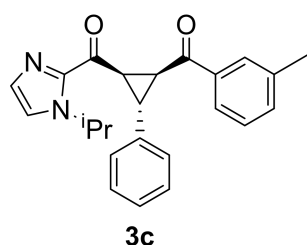

**(1R,2S,3S)-2-(3-methylbenzoyl)-3-phenylcyclopropyl-(isopropyl-1H-imidazol-2-yl)methanone (3c)**, yellow oil (35.6 mg, 95 % yield). HPLC: 83% ee (Chiralpak IC column,  $\lambda = 254$  nm, n-hexane/i-PrOH = 80:20, flow rate: 1.0 mL/min, 40 °C, tr (major) = 9.85 min, tr (minor) = 7.38 min.  $[\alpha]_{\text{D}}^{26} = +9.8$  (c = 0.1, CH<sub>2</sub>Cl<sub>2</sub>). <sup>1</sup>H NMR (400 MHz, CDCl<sub>3</sub>)  $\delta = 7.84 - 7.78$  (m, 2H), 7.38 – 7.31 (m, 4H), 7.27 – 7.22 (m, 3H), 7.20 (dd,  $J = 13.8, 1.1$  Hz, 2H), 5.41 (p,  $J = 6.7$  Hz, 1H), 4.19 (dd,  $J = 9.7, 6.1$  Hz, 1H), 3.57 (t,  $J = 6.3$  Hz, 1H), 3.30 (dd,  $J = 9.7, 6.6$  Hz, 1H), 2.33 (s, 3H), 1.38 (d,  $J = 6.7$  Hz, 3H), 1.21 (d,  $J = 6.7$  Hz, 3H). <sup>13</sup>C NMR (101 MHz, CDCl<sub>3</sub>)  $\delta = 194.29, 186.13, 143.00, 138.81, 138.39, 137.20, 133.93, 129.94, 129.16, 128.76, 127.06, 126.87, 125.89, 121.31, 49.29, 38.79, 36.81, 30.43, 23.55, 21.38$ . HRMS (APCI) m/z calcd for C<sub>24</sub>H<sub>27</sub>N<sub>2</sub>O<sub>2</sub><sup>+</sup> (M+H)<sup>+</sup>: 375.2021, found 375.2019.

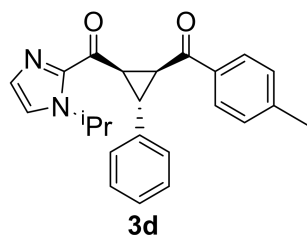

**(1R,2S,3S)-2-(4-methylbenzoyl)-3-phenylcyclopropyl-(isopropyl-1H-imidazol-2-yl)methanone (3d).** yellow solid (33.8 mg, 95% yield), mp 101.4-102.3 °C. HPLC: 81% ee (Chiralpak IC column,  $\lambda = 254$  nm, n-hexane/*i*-PrOH = 80:20, flow rate: 1.0 mL/min, 40 °C, tr (major) = 13.74 min, tr (minor) = 9.23 min.  $[\alpha]_{\text{D}}^{26} = +15.2$  (c = 0.1, CH<sub>2</sub>Cl<sub>2</sub>). <sup>1</sup>H NMR (400 MHz, CDCl<sub>3</sub>)  $\delta = 7.83$  (d,  $J = 8.3$  Hz, 2H), 7.25 (d,  $J = 3.1$  Hz, 4H), 7.16 (d,  $J = 12.1$  Hz, 2H), 7.09 (d,  $J = 7.2$  Hz, 3H), 5.35 (p,  $J = 6.7$  Hz, 1H), 4.09 (dd,  $J = 9.7, 6.0$  Hz, 1H), 3.48 (t,  $J = 6.3$  Hz, 1H), 3.23 (dd,  $J = 9.7, 6.6$  Hz, 1H), 2.28 (s, 3H), 1.30 (d,  $J = 6.7$  Hz, 3H), 1.15 (d,  $J = 6.6$  Hz, 3H). <sup>13</sup>C NMR (101 MHz, CDCl<sub>3</sub>)  $\delta = 193.65, 186.19, 143.95, 142.99, 138.84, 134.74, 130.34, 129.90, 129.24, 128.75, 127.03, 126.85, 121.28, 49.70, 38.72, 37.30, 30.48, 23.55, 21.76$ . HRMS (APCI)  $m/z$  calcd for C<sub>24</sub>H<sub>27</sub>N<sub>2</sub>O<sub>2</sub><sup>+</sup> (M+H)<sup>+</sup>: 375.2022, found 375.2020.

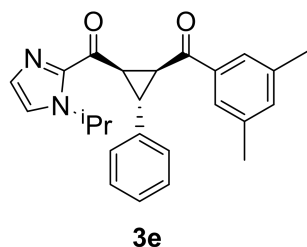

**(1R,2S,3S)-2-(3,5-dimethylbenzoyl)-3-phenylcyclopropyl-(1-isopropyl-1H-imidazol-2-yl)methanone (3e).** yellow oil (37.1 mg, 96% yield). HPLC: 88% ee (Chiralpak IC column,  $\lambda = 254$  nm, n-hexane/*i*-PrOH = 80:20, flow rate: 1.0 mL/min, 40 °C, tr (major) = 6.70 min, tr (minor) = 4.89 min.  $[\alpha]_{\text{D}}^{26} = +28.4$  (c = 0.1, CH<sub>2</sub>Cl<sub>2</sub>). <sup>1</sup>H NMR (400 MHz, CDCl<sub>3</sub>)  $\delta = 7.63$  (s, 2H), 7.33 (d,  $J = 4.8$  Hz, 4H), 7.26 – 7.14 (m, 3H), 7.11 (s, 1H), 5.40 (p,  $J = 6.7$  Hz, 1H), 4.19 (dd,  $J = 9.8, 6.1$  Hz, 1H), 3.57 (t,  $J = 6.3$  Hz, 1H), 3.29 (dd,  $J = 9.8, 6.5$  Hz, 1H), 2.27 (s, 6H), 1.37 (d,  $J = 6.7$  Hz, 3H), 1.20 (d,  $J = 6.7$  Hz, 3H). <sup>13</sup>C NMR (101 MHz, CDCl<sub>3</sub>)  $\delta = 194.38, 186.08, 143.98, 138.85, 138.17, 137.22, 134.79, 130.39, 129.22, 126.98, 126.84, 126.45, 121.24,$

49.24, 40.39, 37.55, 30.22, 24.73, 21.22. HRMS (APCI)  $m/z$  calcd for  $C_{25}H_{27}N_2O_2^+$  (M+H)<sup>+</sup>: 387.2002, found 387.2000.

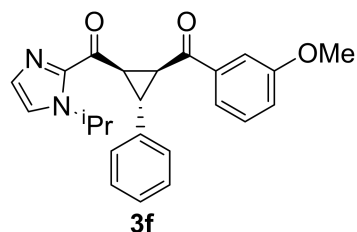

**(1R,2S,3S)-2-(3-methoxybenzoyl)-3-phenylcyclopropyl-(1-isopropyl-1H-imidazol-2-yl)methanone (3f)**. pale yellow solid (37.3 mg, 96% yield); mp 93.3-94.8 °C. HPLC:80% ee (Chiralpak IC column,  $\lambda$  = 254 nm, n-hexane/i-PrOH = 80:20, flow rate: 1.0 mL/min, 40 °C, tr (major) = 10.06 min, tr (minor) = 7.19 min.  $[\alpha]_D^{26}$  = +17.3 (c = 0.1,  $CH_2Cl_2$ ). <sup>1</sup>H NMR (400 MHz,  $CDCl_3$ )  $\delta$  = 8.02 – 7.96 (m, 2H), 7.32 (d,  $J$  = 5.3 Hz, 4H), 7.28 – 7.21 (m, 2H), 7.18 (s, 1H), 6.86 – 6.82 (m, 2H), 5.43 (p,  $J$  = 6.7 Hz, 1H), 4.16 (dd,  $J$  = 9.7, 6.0 Hz, 1H), 3.81 (s, 3H), 3.55 (t,  $J$  = 6.3 Hz, 1H), 3.28 (dd,  $J$  = 9.7, 6.6 Hz, 1H), 1.37 (d,  $J$  = 6.7 Hz, 3H), 1.23 (d,  $J$  = 6.7 Hz, 3H). <sup>13</sup>C NMR (101 MHz,  $CDCl_3$ )  $\delta$  = 194.35, 186.59, 150.34, 144.40, 141.67, 138.86, 130.87, 129.53, 128.89, 126.80, 125.30, 121.79, 49.40, 38.31, 36.60, 33.58, 30.94, 24.21. HRMS (APCI)  $m/z$  calcd for  $C_{24}H_{25}N_2O_2^+$  (M+H)<sup>+</sup>: 389.1803, found 389.1805.

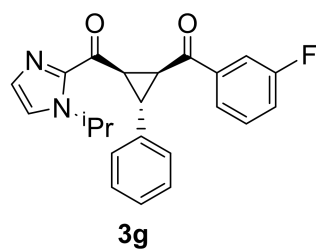

**(1R,2S,3S)-2-(3-fluorobenzoyl)-3-phenylcyclopropyl-(1-isopropyl-1H-imidazol-2-yl)methanone (3g)**. pale yellow solid (34.7 mg, 92% yield); mp 87.3-88.9 °C. HPLC: 83% ee (Chiralpak IC column,  $\lambda$  = 254 nm, n-hexane/i-PrOH = 80:20, flow rate: 1.0 mL/min, 40 °C, tr (major) = 6.45 min, tr (minor) = 5.54 min.  $[\alpha]_D^{26}$  = +31.2 (c = 0.1,  $CH_2Cl_2$ ). <sup>1</sup>H NMR (400 MHz,  $CDCl_3$ )  $\delta$  = 8.07 – 8.02 (m, 2H), 7.35 – 7.29 (m, 4H), 7.26 – 7.23 (m, 2H), 7.18 (d,  $J$  = 1.1 Hz, 1H), 7.08 – 7.01 (m, 2H), 5.42 (p,  $J$  = 6.7 Hz, 1H), 4.20 (dd,  $J$  = 9.7, 6.1 Hz, 1H), 3.56 (t,  $J$  = 6.3 Hz, 1H), 3.26 (dd,  $J$  = 9.7, 6.6 Hz, 1H), 1.38 (d,  $J$  = 6.7 Hz, 3H), 1.24 (d,  $J$  = 6.7 Hz, 3H). <sup>13</sup>C NMR (101 MHz,  $CDCl_3$ )

$\delta$  = 192.55, 186.00, 167.10, 164.56, 142.86, 138.55, 133.63, 131.19, 130.02, 128.80, 127.15, 126.83, 121.47, 115.77, 115.55, 49.32, 38.49, 36.69, 30.49, 23.57, 23.50.  $^{19}\text{F}$  NMR (376 MHz,  $\text{CDCl}_3$ )  $\delta$  = 105.32. HRMS (APCI)  $m/z$  calcd for  $\text{C}_{23}\text{H}_{22}\text{FN}_2\text{O}_2^+$  ( $\text{M}+\text{H}$ ) $^+$ : 376.1601, found 376.1599.

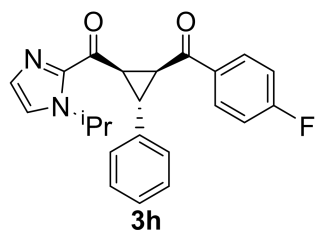

**(1R,2S,3S)-2-(4-fluorobenzoyl)-3-phenylcyclopropyl-(1-isopropyl-1H-imidazol-2-yl)methanone (3h)**. pale yellow solid (34.7 mg, 92% yield); mp 87.3-88.9 °C. HPLC: 80% ee (Chiralpak IC column,  $\lambda$  = 254 nm, n-hexane/*i*-PrOH = 80:20, flow rate: 1.0 mL/min, 40 °C,  $t_r$  (major) = 7.67 min,  $t_r$  (minor) = 5.84 min.  $[\alpha]_{\text{D}}^{26}$  = +15.1 ( $c$  = 0.1,  $\text{CH}_2\text{Cl}_2$ ).  $^1\text{H}$  NMR (400 MHz,  $\text{CDCl}_3$ )  $\delta$  = 8.07 – 8.01 (m, 2H), 7.33 (dd,  $J$  = 8.2, 2.0 Hz, 4H), 7.26 (s, 1H), 7.23 (d,  $J$  = 1.1 Hz, 1H), 7.18 (d,  $J$  = 1.1 Hz, 1H), 7.07 – 7.02 (m, 2H), 5.42 (p,  $J$  = 6.7 Hz, 1H), 4.20 (dd,  $J$  = 9.7, 6.1 Hz, 1H), 3.56 (t,  $J$  = 6.3 Hz, 1H), 3.26 (dd,  $J$  = 9.7, 6.6 Hz, 1H), 1.38 (d,  $J$  = 6.7 Hz, 3H), 1.24 (d,  $J$  = 6.7 Hz, 3H).  $^{13}\text{C}$  NMR (101 MHz,  $\text{CDCl}_3$ )  $\delta$  = 192.55, 186.00, 167.10, 164.56, 142.86, 138.55, 133.63, 131.19, 130.02, 128.80, 127.15, 126.83, 121.47, 115.77, 115.55, 49.32, 38.49, 36.69, 30.49, 23.57, 23.50.  $^{19}\text{F}$  NMR (376 MHz,  $\text{CDCl}_3$ )  $\delta$  = 105.34. HRMS (APCI)  $m/z$  calcd for  $\text{C}_{23}\text{H}_{22}\text{FN}_2\text{O}_2^+$  ( $\text{M}+\text{H}$ ) $^+$ : 376.1600, found 376.1602.

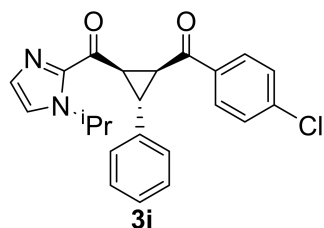

**(1R,2S,3S)-2-(4-chlorobenzoyl)-3-phenylcyclopropyl-(1-isopropyl-1H-imidazol-2-yl)methanone (3i)**. pale yellow solid (36.5 mg, 93% yield); mp 87.8-89.6 °C. HPLC: 66% ee (Chiralpak IC column,  $\lambda$  = 254 nm, n-hexane/*i*-PrOH = 80:20, flow rate: 1.0 mL/min, 40 °C,  $t_r$  (major) = 8.40 min,  $t_r$  (minor) = 6.78 min.  $[\alpha]_{\text{D}}^{26}$  = +14.3 ( $c$  = 0.1,  $\text{CH}_2\text{Cl}_2$ ).  $^1\text{H}$  NMR (400 MHz,  $\text{CDCl}_3$ )  $\delta$  = 7.98 – 7.93 (m, 2H), 7.36 – 7.30 (m, 6H), 7.28 – 7.23 (m, 2H), 7.18 (d,  $J$  = 1.0 Hz, 1H), 5.40 (p,  $J$  = 6.7 Hz, 1H), 4.20 (dd,  $J$  =

9.6, 6.0 Hz, 1H), 3.55 (t,  $J = 6.3$  Hz, 1H), 3.25 (dd,  $J = 9.7, 6.6$  Hz, 1H), 1.38 (d,  $J = 6.7$  Hz, 3H), 1.24 (d,  $J = 6.7$  Hz, 3H).  $^{13}\text{C}$  NMR (101 MHz,  $\text{CDCl}_3$ )  $\delta = 192.97, 186.53, 142.81, 139.58, 138.46, 135.50, 130.04, 129.99, 128.87, 128.80, 127.17, 126.82, 49.32, 38.41, 36.75, 30.52, 23.54, 23.51$ . HRMS (APCI)  $m/z$  calcd for  $\text{C}_{23}\text{H}_{22}\text{ClN}_2\text{O}_2^+$  ( $\text{M}+\text{H}$ ) $^+$ : 393.1301, found 393.1300.

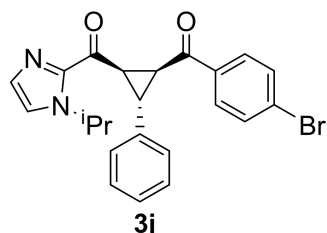

**(1R,2S,3S)-2-(4-bromobenzoyl)-3-phenylcyclopropyl-(1-isopropyl-1H-imidazol-2-yl)methanone (3j)**. pale yellow solid (41.5 mg, 95% yield); mp 134.4-135.6 °C. HPLC: 71% ee (Chiralpak IC column,  $\lambda = 254$  nm, n-hexane/*i*-PrOH = 80:20, flow rate: 1.0 mL/min, 40 °C, tr (major) = 8.32 min, tr (minor) = 7.77min.  $[\alpha]_{\text{D}}^{26} = +15.6$  ( $c = 0.1, \text{CH}_2\text{Cl}_2$ ).  $^1\text{H}$  NMR (400 MHz,  $\text{CDCl}_3$ )  $\delta = 7.87$  (d,  $J = 8.5$  Hz, 2H), 7.51 (d,  $J = 8.5$  Hz, 2H), 7.29 (d,  $J = 20.8$  Hz, 5H), 7.21 (d,  $J = 21.2$  Hz, 2H), 5.40 (p,  $J = 6.7$  Hz, 1H), 4.20 (dd,  $J = 9.6, 6.0$  Hz, 1H), 3.55 (t,  $J = 6.3$  Hz, 1H), 3.24 (dd,  $J = 9.6, 6.6$  Hz, 1H), 1.37 (d,  $J = 6.6$  Hz, 3H), 1.24 (d,  $J = 6.7$  Hz, 3H).  $^{13}\text{C}$  NMR (101 MHz,  $\text{CDCl}_3$ )  $\delta = 193.16, 185.88, 142.79, 138.43, 135.89, 131.85, 130.08, 130.04, 128.79, 128.33, 127.16, 126.80, 121.52, 49.32, 38.36, 36.75, 30.52, 23.52$ . HRMS (APCI)  $m/z$  calcd for  $\text{C}_{23}\text{H}_{22}\text{BrN}_2\text{O}_2^+$  ( $\text{M}+\text{H}$ ) $^+$ : 437.0801, found 437.0799.

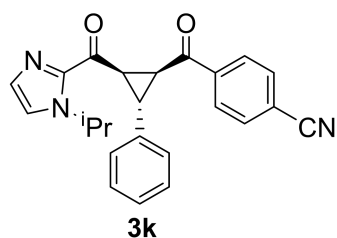

**(1S,2R,3S)-3-phenylcyclopropane-1-carbonyl-2-(1-isopropyl-1H-imidazole-2-carbonyl)benzotrile (3k)**. yellow oil (35.3 mg, 96% yield). HPLC: 75% ee (Chiralpak IC column,  $\lambda = 254$  nm, n-hexane/*i*-PrOH = 80:20, flow rate: 1.0 mL/min, 40 °C, tr (major) = 14.67 min, tr (minor) = 10.77 min.  $[\alpha]_{\text{D}}^{26} = +19.2$  ( $c = 0.1, \text{CH}_2\text{Cl}_2$ ).  $^1\text{H}$  NMR (400 MHz,  $\text{CDCl}_3$ )  $\delta = 8.10$  (d,  $J = 8.4$  Hz, 2H), 7.69 (d,  $J = 8.5$  Hz, 2H), 7.38 – 7.25 (m, 6H), 7.19 (s, 1H), 5.39 (p,  $J = 6.7$  Hz, 1H), 4.24 (dd,  $J = 9.6, 6.1$  Hz, 1H),

3.56 (t,  $J = 6.3$  Hz, 1H), 3.25 (dd,  $J = 9.6, 6.5$  Hz, 1H), 1.38 (d,  $J = 6.7$  Hz, 3H), 1.23 (s, 3H).  $^{13}\text{C}$  NMR (101 MHz,  $\text{CDCl}_3$ )  $\delta = 193.17, 185.63, 142.60, 140.13, 138.06, 133.06, 130.18, 128.90, 128.85, 127.32, 126.78, 121.74, 118.05, 116.29, 49.36, 38.16, 37.06, 31.43, 23.55, 23.45$ . HRMS (APCI)  $m/z$  calcd for  $\text{C}_{24}\text{H}_{22}\text{N}_3\text{O}_2^+$  ( $\text{M}+\text{H}$ ) $^+$ : 384.1604, found 384.1602.

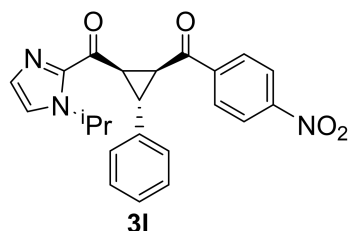

**(1R,2S,3S)-2-(4-nitrobenzoyl)-3-phenylcyclopropyl-(1-isopropyl-1H-imidazol-2-yl)methanone (31)**. yellow oil (36.3 mg, 96% yield). HPLC: 99% ee (Chiralpak IC column,  $\lambda = 254$  nm, n-hexane/*i*-PrOH = 80:20, flow rate: 1.0 mL/min, 40 °C,  $t_r$  (major) = 12.27 min,  $t_r$  (minor) = 9.36 min.  $[\alpha]_{\text{D}}^{26} = +31.2$  ( $c = 0.1, \text{CH}_2\text{Cl}_2$ ).  $^1\text{H}$  NMR (400 MHz,  $\text{CDCl}_3$ )  $\delta = 7.77$  (dd,  $J = 3.8, 1.2$  Hz, 1H), 7.57 (dd,  $J = 5.0, 1.2$  Hz, 1H), 7.46 – 7.08 (m, 8H), 7.03 (dd,  $J = 5.0, 3.8$  Hz, 1H), 5.47 (p,  $J = 6.7$  Hz, 1H), 4.11 (dd,  $J = 9.6, 6.2$  Hz, 1H), 3.57 (t,  $J = 6.3$  Hz, 1H), 3.28 (dd,  $J = 9.6, 6.4$  Hz, 1H), 1.40 (d,  $J = 6.7$  Hz, 3H), 1.28 (d,  $J = 6.6$  Hz, 3H).  $^{13}\text{C}$  NMR (101 MHz,  $\text{CDCl}_3$ )  $\delta = 193.07, 185.90, 164.07, 161.61, 142.79, 139.31, 139.25, 138.42, 130.26, 130.18, 130.06, 128.80, 127.18, 126.81, 124.41, 124.38, 121.50, 120.26, 120.05, 115.27, 115.05, 49.32, 38.40, 36.86, 30.68, 23.55, 23.48$ . HRMS (APCI)  $m/z$  calcd for  $\text{C}_{23}\text{H}_{22}\text{N}_3\text{O}_4^+$  ( $\text{M}+\text{H}$ ) $^+$ : 403.1500, found 403.1499.

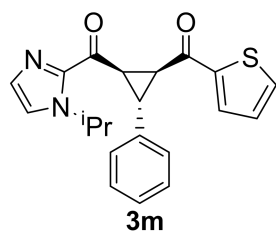

**(1R,2S,3S)-2-phenyl-3-(thiophene-2-carbonyl)cyclopropyl-(1-isopropyl-1H-imidazol-2-yl)methanone (3m)**. yellow oil (34.3 mg, 94% yield). HPLC: 42% ee (Chiralpak IC column,  $\lambda = 254$  nm, n-hexane/*i*-PrOH = 80:20, flow rate: 1.0 mL/min, 40 °C,  $t_r$  (major) = 9.81 min,  $t_r$  (minor) = 7.34 min.  $[\alpha]_{\text{D}}^{26} = +30.7$  ( $c = 0.1, \text{CH}_2\text{Cl}_2$ ).

$^1\text{H}$  NMR (400 MHz,  $\text{CDCl}_3$ )  $\delta$  = 7.77 (dd,  $J$  = 3.8, 1.2 Hz, 1H), 7.57 (dd,  $J$  = 5.0, 1.2 Hz, 1H), 7.35 – 7.29 (m, 4H), 7.24 (d,  $J$  = 6.2 Hz, 2H), 7.17 (s, 1H), 7.03 (dd,  $J$  = 5.0, 3.8 Hz, 1H), 5.47 (p,  $J$  = 6.7 Hz, 1H), 4.11 (dd,  $J$  = 9.6, 6.2 Hz, 1H), 3.57 (t,  $J$  = 6.3 Hz, 1H), 3.28 (dd,  $J$  = 9.6, 6.4 Hz, 1H), 1.40 (d,  $J$  = 6.7 Hz, 3H), 1.28 (d,  $J$  = 6.6 Hz, 3H).  $^{13}\text{C}$  NMR (101 MHz,  $\text{CDCl}_3$ )  $\delta$  = 186.71, 185.86, 144.37, 142.96, 138.97, 133.73, 132.62, 129.94, 128.76, 128.10, 127.12, 126.83, 121.35, 49.32, 38.79, 36.50, 30.62, 23.61, 23.49. HRMS (APCI)  $m/z$  calcd for  $\text{C}_{21}\text{H}_{21}\text{N}_2\text{O}_2\text{S}^+$  ( $\text{M}+\text{H}$ ) $^+$ : 365.1200, found 365.1203.

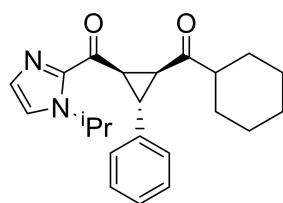

**3n**

**(1R,2S,3S)-2-(cyclohexanecarbonyl)-3-phenylcyclopropyl-(1-isopropyl-1H-imidazol-2-yl)methanone (3n)**. colourless solid (35.4 mg, 97% yield); mp 67.1-68.8 °C. HPLC: 99% ee (Chiralpak IC column,  $\lambda$  = 254 nm, n-hexane/*i*-PrOH = 80:20, flow rate: 1.0 mL/min, 40 °C, tr (major) = 8.40 min, tr (minor) = 7.14 min.  $[\alpha]_{\text{D}}^{26}$  = +4.9 ( $c$  = 0.1,  $\text{CH}_2\text{Cl}_2$ ).  $^1\text{H}$  NMR (400 MHz,  $\text{CDCl}_3$ )  $\delta$  = 7.34 – 7.27 (m, 2H), 7.27 – 7.22 (m, 4H), 7.17 (d,  $J$  = 1.1 Hz, 1H), 5.55 (p,  $J$  = 6.7 Hz, 1H), 3.80 (dd,  $J$  = 9.7, 6.4 Hz, 1H), 3.38 (t,  $J$  = 6.3 Hz, 1H), 2.87 (dd,  $J$  = 9.7, 6.3 Hz, 1H), 2.54 – 2.46 (m, 1H), 1.84 – 1.61 (m, 5H), 1.43 (dd,  $J$  = 6.7, 4.4 Hz, 6H), 1.34 – 1.14 (m, 5H).  $^{13}\text{C}$  NMR (101 MHz,  $\text{CDCl}_3$ )  $\delta$  = 207.85, 185.94, 142.85, 138.86, 129.78, 128.70, 126.94, 126.65, 121.16, 51.43, 49.33, 39.35, 37.44, 30.91, 28.33, 28.21, 25.94, 25.68, 23.80, 23.56. HRMS (APCI)  $m/z$  calcd for  $\text{C}_{23}\text{H}_{29}\text{N}_2\text{O}_2^+$  ( $\text{M}+\text{H}$ ) $^+$ : 365.2211, found 365.2209.



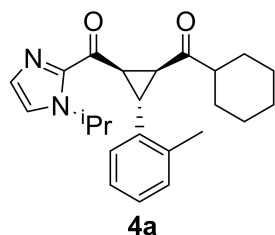

**(1R,2S,3S)-2-(cyclohexanecarbonyl)-3-(o-tolyl)cyclopropyl-(1-isopropyl-1H-imidazol-2-yl)methanone (4a).** colourless solid (37.1 mg, 98% yield); mp 65.8-67.6 °C. HPLC: 99% ee (Chiralpak IC column,  $\lambda = 254$  nm, n-hexane/*i*-PrOH = 80:20, flow rate: 1.0 mL/min, 40 °C, tr (major) = 7.11 min, tr (minor) = 5.76 min.  $[\alpha]_D^{26} = +2.8$  (c = 0.1, CH<sub>2</sub>Cl<sub>2</sub>). <sup>1</sup>H NMR (400 MHz, CDCl<sub>3</sub>)  $\delta = 7.27$  (s, 1H), 7.18 – 7.13 (m, 4H), 7.10 (d,  $J = 4.4$  Hz, 1H), 5.56 (p,  $J = 6.7$  Hz, 1H), 3.77 (dd,  $J = 9.6, 6.7$  Hz, 1H), 3.43 (t,  $J = 6.6$  Hz, 1H), 2.83 (dd,  $J = 9.6, 6.5$  Hz, 1H), 2.55 – 2.47 (m, 1H), 2.38 (s, 3H), 1.77 (dd,  $J = 43.6, 29.8$  Hz, 5H), 1.44 (dd,  $J = 11.8, 6.7$  Hz, 6H), 1.36 – 1.15 (m, 5H). <sup>13</sup>C NMR (101 MHz, CDCl<sub>3</sub>)  $\delta = 208.19, 186.28, 142.86, 138.15, 136.78, 130.09, 129.80, 127.10, 126.08, 125.85, 121.17, 51.54, 49.33, 37.69, 36.54, 28.90, 28.47, 28.25, 25.95, 25.71, 25.68, 23.86, 23.54, 19.76$ . HRMS (APCI) *m/z* calcd for C<sub>24</sub>H<sub>31</sub>N<sub>2</sub>O<sub>2</sub><sup>+</sup> (M+H)<sup>+</sup>: 379.2301, found 379.2303.

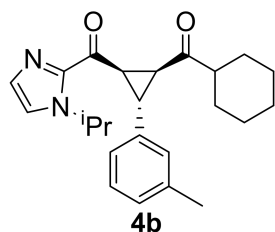

**(1R,2S,3S)-2-(cyclohexanecarbonyl)-3-(m-tolyl)cyclopropyl-(1-isopropyl-1H-imidazol-2-yl)methanone (4b).** colourless solid (36.0 mg, 95% yield); mp 67.9-69.2 °C. HPLC: 93% ee (Chiralpak IC column,  $\lambda = 254$  nm, n-hexane/*i*-PrOH = 80:20, flow rate: 1.0 mL/min, 40 °C, tr (major) = 10.47 min, tr (minor) = 8.63 min.  $[\alpha]_D^{26} = +6.8$  (c = 0.1, CH<sub>2</sub>Cl<sub>2</sub>). <sup>1</sup>H NMR (400 MHz, CDCl<sub>3</sub>)  $\delta = 7.18$  (s, 1H), 7.14 – 7.08 (m, 2H), 6.96 (d,  $J = 5.5$  Hz, 3H), 5.47 (p,  $J = 6.7$  Hz, 1H), 3.72 (dd,  $J = 9.7, 6.4$  Hz, 1H), 3.27 (t,  $J = 6.3$  Hz, 1H), 2.79 (dd,  $J = 9.7, 6.3$  Hz, 1H), 2.46 – 2.37 (m, 1H), 2.25 (s, 3H), 1.76 – 1.53 (m, 5H), 1.36 (dd,  $J = 6.7, 4.1$  Hz, 6H), 1.27 – 1.07 (m, 5H). <sup>13</sup>C NMR (101 MHz, CDCl<sub>3</sub>)  $\delta = 207.88, 185.97, 142.86, 138.78, 138.35, 129.75, 128.58, 127.69, 127.21, 123.73, 121.12, 51.41, 49.31, 39.43, 37.47, 30.45, 28.31, 28.21, 25.94,$

25.68, 25.66, 23.78, 23.56, 21.48. HRMS (APCI)  $m/z$  calcd for  $C_{24}H_{31}N_2O_2^+$  ( $M+H$ )<sup>+</sup>: 379.2300, found 379.2298.

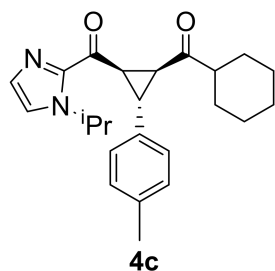

**(1R,2S,3S)-2-(cyclohexanecarbonyl)-3-(p-tolyl)cyclopropyl-(1-isopropyl-1H-imidazol-2-yl)methanone (4c)**. colourless oil (36.0 mg, 95% yield). HPLC: 91% ee (Chiralpak IC column,  $\lambda = 254$  nm, n-hexane/i-PrOH = 80:20, flow rate: 1.0 mL/min, 40 °C,  $t_r$  (major) = 12.22 min,  $t_r$  (minor) = 9.72 min.  $[\alpha]_D^{26} = +3.5$  ( $c = 0.1$ ,  $CH_2Cl_2$ ).  $^1H$  NMR (400 MHz,  $CDCl_3$ )  $\delta = 7.27 - 7.25$  (m, 1H), 7.17 (s, 1H), 7.12 (s, 4H), 5.55 (p,  $J = 6.7$  Hz, 1H), 3.77 (dd,  $J = 9.7, 6.4$  Hz, 1H), 3.34 (t,  $J = 6.3$  Hz, 1H), 2.83 (dd,  $J = 9.6, 6.3$  Hz, 1H), 2.53 – 2.44 (m, 1H), 2.32 (s, 3H), 1.85 – 1.61 (m, 5H), 1.43 (dd,  $J = 6.7, 4.4$  Hz, 6H), 1.30 – 1.14 (m, 5H).  $^{13}C$  NMR (101 MHz,  $CDCl_3$ )  $\delta = 208.01, 186.13, 158.69, 142.90, 130.86, 129.75, 127.78, 121.11, 114.13, 55.43, 51.42, 49.31, 39.30, 37.34, 30.07, 28.34, 28.22, 25.96, 25.16, 23.80, 23.57$ . HRMS (APCI)  $m/z$  calcd for  $C_{24}H_{31}N_2O_2^+$  ( $M+H$ )<sup>+</sup>: 379.2299, found 379.2298.

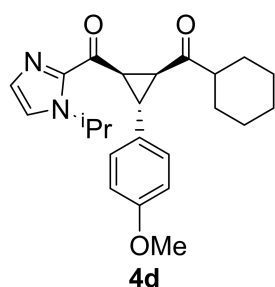

**(1R,2S,3S)-2-(cyclohexanecarbonyl)-3-(4-methoxyphenyl)cyclopropyl-(1-isopropyl-1H-imidazol-2-yl)methanone (4d)**. colourless oil (36.3 mg, 92% yield). HPLC: 90% ee (Chiralpak IC column,  $\lambda = 254$  nm, n-hexane/i-PrOH = 80:20, flow rate: 1.0 mL/min, 40 °C,  $t_r$  (major) = 8.54 min,  $t_r$  (minor) = 7.96 min.  $[\alpha]_D^{26} = +18.8$  ( $c = 0.1$ ,  $CH_2Cl_2$ ).  $^1H$  NMR (400 MHz,  $CDCl_3$ )  $\delta = 7.25$  (s, 1H), 7.18 – 7.13 (m, 3H), 6.84 (d,  $J = 8.7$  Hz, 2H), 5.55 (p,  $J = 6.7$  Hz, 1H), 3.79 (s, 3H), 3.75 (dd,  $J = 9.6, 6.4$  Hz, 1H), 3.33 (t,  $J = 6.4$  Hz, 1H), 2.80 (dd,  $J = 9.6, 6.3$  Hz, 1H), 2.49 (td,  $J = 10.9, 5.4$  Hz, 1H),

1.83 – 1.60 (m, 5H), 1.43 (dd,  $J = 6.7, 5.3$  Hz, 6H), 1.27 – 1.15 (m, 5H).  $^{13}\text{C}$  NMR (101 MHz,  $\text{CDCl}_3$ )  $\delta = 186.13, 158.69, 142.90, 130.86, 129.75, 127.78, 121.11, 114.13, 55.43, 51.42, 49.31, 39.30, 37.34, 30.07, 28.34, 28.22, 25.96, 25.69, 23.80, 23.57$ . HRMS (APCI)  $m/z$  calcd for  $\text{C}_{24}\text{H}_{31}\text{N}_2\text{O}_3^+$  ( $\text{M}+\text{H}$ ) $^+$ : 395.2297, found 395.2299.

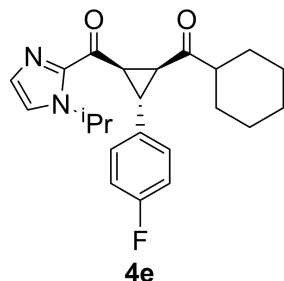

**(1R,2S,3S)-2-(cyclohexanecarbonyl)-3-(4-fluorophenyl)cyclopropyl-(1-isopropyl-1H-imidazol-2-yl)methanone (4e)**. colourless oil (36.0 mg, 94% yield). HPLC: 99% ee (Chiralpak IC column,  $\lambda = 254$  nm, n-hexane/*i*-PrOH = 80:20, flow rate: 1.0 mL/min, 40 °C, tr (major) = 11.99 min, tr (minor) = 9.43 min.  $[\alpha]_{\text{D}}^{26} = +3.6$  ( $c = 0.1$ ,  $\text{CH}_2\text{Cl}_2$ ).  $^1\text{H}$  NMR (400 MHz,  $\text{CDCl}_3$ )  $\delta = 7.35$  (dd,  $J = 7.2, 2.2$  Hz, 2H), 7.27 (s, 1H), 7.17 (dd,  $J = 5.2, 2.4$  Hz, 3H), 5.53 (p,  $J = 6.6$  Hz, 1H), 3.78 (dd,  $J = 9.8, 6.4$  Hz, 1H), 3.34 (t,  $J = 6.3$  Hz, 1H), 2.85 (dd,  $J = 9.8, 6.2$  Hz, 1H), 2.52 – 2.44 (m, 1H), 1.69 (s, 5H), 1.43 (t,  $J = 6.7$  Hz, 6H), 1.36 – 1.14 (m, 5H).  $^{13}\text{C}$  NMR (101 MHz,  $\text{CDCl}_3$ )  $\delta = 207.41, 185.40, 142.72, 141.32, 130.22, 130.08, 129.91, 129.61, 125.57, 122.85, 121.35, 51.46, 49.39, 39.14, 37.47, 29.71, 28.33, 28.19, 25.93, 25.66, 23.81, 23.56$ .  $^{19}\text{F}$  NMR (376 MHz,  $\text{CDCl}_3$ )  $\delta = 114.46$ . HRMS (APCI)  $m/z$  calcd for  $\text{C}_{23}\text{H}_{28}\text{FN}_2\text{O}_2^+$  ( $\text{M}+\text{H}$ ) $^+$ : 383.2100, found 383.2099.

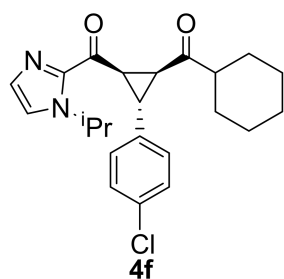

**(1R,2S,3S)-2-(4-chlorophenyl)-3-cyclopropyl-(1-isopropyl-1H-imidazole-2-carbonyl)(cyclohexyl)methanone (4f)**. colourless solid (38.3 mg, 96% yield); mp 113.8-115.7 °C. HPLC: 90% ee (Chiralpak IC column,  $\lambda = 254$  nm, n-hexane/*i*-PrOH

= 80:20, flow rate: 1.0 mL/min, 40 °C, tr (major) = 8.91min, tr (minor) = 7.84 min.  $[\alpha]_D^{26} = +13.2$  (c = 0.1, CH<sub>2</sub>Cl<sub>2</sub>). <sup>1</sup>H NMR (400 MHz, CDCl<sub>3</sub>)  $\delta$  = 7.31 – 7.26 (m, 3H), 7.18 – 7.14 (m, 3H), 5.53 (p, *J* = 6.7 Hz, 1H), 3.77 (dd, *J* = 9.7, 6.4 Hz, 1H), 3.34 (t, *J* = 6.3 Hz, 1H), 2.82 (dd, *J* = 9.8, 6.2 Hz, 1H), 2.52 – 2.44 (m, 1H), 1.81 (d, *J* = 42.8 Hz, 5H), 1.43 (t, *J* = 6.6 Hz, 6H), 1.28 – 1.14 (m, 5H). <sup>13</sup>C NMR (101 MHz, CDCl<sub>3</sub>)  $\delta$  = 207.55, 185.57, 142.75, 137.43, 132.70, 129.87, 128.83, 128.06, 121.31, 51.45, 49.38, 39.16, 37.39, 29.72, 28.34, 28.17, 25.92, 25.66, 23.80, 23.55. HRMS (APCI) m/z calcd for C<sub>23</sub>H<sub>28</sub>ClN<sub>2</sub>O<sub>2</sub><sup>+</sup> (M+H)<sup>+</sup>: 399.1797, found 399.1800.

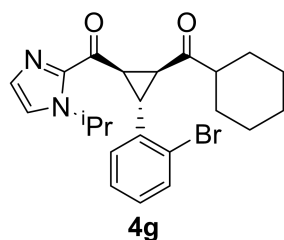

**(1R,2S,3S)-2-(2-bromophenyl)-3-(1-isopropyl-1H-imidazole-2-carbonyl)cyclopropyl(cyclohexyl)methanone (4g)**. yellow oil (43.3 mg, 98% yield). HPLC: 98% ee (Chiralpak IC column,  $\lambda$  = 254 nm, n-hexane/i-PrOH = 80:20, flow rate: 1.0 mL/min, 40 °C, tr (major) = 9.60 min, tr (minor) = 8.26 min.  $[\alpha]_D^{26} = +10.8$  (c = 0.1, CH<sub>2</sub>Cl<sub>2</sub>). <sup>1</sup>H NMR (400 MHz, CDCl<sub>3</sub>)  $\delta$  = 7.57 (d, *J* = 7.9 Hz, 1H), 7.26 (d, *J* = 5.8 Hz, 2H), 7.18 – 7.10 (m, 3H), 5.57 (p, *J* = 6.7 Hz, 1H), 3.80 (dd, *J* = 9.7, 6.7 Hz, 1H), 3.57 (t, *J* = 6.5 Hz, 1H), 2.76 (dd, *J* = 9.7, 6.4 Hz, 1H), 2.60 – 2.51 (m, 1H), 1.81 (d, *J* = 47.2 Hz, 5H), 1.44 (dd, *J* = 10.3, 6.7 Hz, 6H), 1.31 – 1.15 (m, 5H). <sup>13</sup>C NMR (101 MHz, CDCl<sub>3</sub>)  $\delta$  = 207.72, 185.69, 142.85, 138.18, 132.86, 129.78, 128.66, 127.98, 127.57, 126.18, 121.19, 51.45, 49.35, 38.06, 36.54, 31.45, 28.38, 28.29, 25.96, 25.74, 25.64, 23.81, 23.59. HRMS (APCI) m/z calcd for C<sub>23</sub>H<sub>28</sub>BrN<sub>2</sub>O<sub>2</sub><sup>+</sup> (M+H)<sup>+</sup>: 443.1300, found 443.1298.

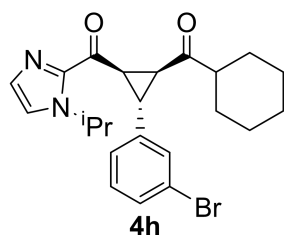

**(1S,2S,3R)-2-(3-bromophenyl)-3-(1-isopropyl-1H-imidazole-2-carbonyl)cyclopropyl(cyclohexyl)methanone (4h)**. yellow oil (42.0 mg, 95% yield). HPLC: 90% ee

(Chiralpak IC column,  $\lambda = 254$  nm, n-hexane/i-PrOH = 80:20, flow rate: 1.0 mL/min, 40 °C,  $t_r$  (major) = 8.44 min,  $t_r$  (minor) = 7.60 min.  $[\alpha]_D^{26} = +14.0$  (c = 0.1, CH<sub>2</sub>Cl<sub>2</sub>). <sup>1</sup>H NMR (400 MHz, CDCl<sub>3</sub>)  $\delta = 7.36$  (d,  $J = 2.7$  Hz, 2H), 7.27 (s, 1H), 7.17 (dd,  $J = 5.5, 2.4$  Hz, 3H), 5.53 (p,  $J = 6.6$  Hz, 1H), 3.78 (dd,  $J = 9.8, 6.4$  Hz, 1H), 3.34 (t,  $J = 6.3$  Hz, 1H), 2.85 (dd,  $J = 9.8, 6.2$  Hz, 1H), 2.53 – 2.45 (m, 1H), 1.82 – 1.61 (m, 5H), 1.43 (t,  $J = 6.8$  Hz, 6H), 1.31 – 1.14 (m, 5H). <sup>13</sup>C NMR (101 MHz, CDCl<sub>3</sub>)  $\delta = 207.40, 185.39, 142.71, 141.31, 130.22, 130.07, 129.90, 129.60, 125.56, 122.84, 121.35, 51.45, 49.38, 39.14, 37.47, 29.71, 28.33, 28.18, 25.92, 25.66, 23.80, 23.55$ . HRMS (APCI)  $m/z$  calcd for C<sub>23</sub>H<sub>28</sub>BrN<sub>2</sub>O<sub>2</sub><sup>+</sup> (M+H)<sup>+</sup>: 443.1299, found 443.1297.

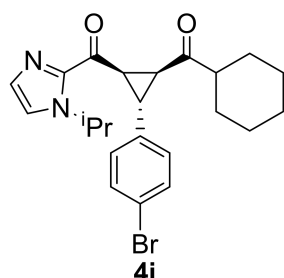

**((1S,2S,3R)-2-(4-bromophenyl)-3-(1-isopropyl-1H-imidazole-2-carbonyl)cyclopropyl)(cyclohexyl)methanon (4i)**. colourless solid (42.0 mg, 95% yield); mp 115.3-116.9°C. HPLC: 93% ee (Chiralpak IC column,  $\lambda = 254$  nm, n-hexane/i-PrOH = 80:20, flow rate: 1.0 mL/min, 40 °C,  $t_r$  (major) = 9.41 min,  $t_r$  (minor) = 8.22 min.  $[\alpha]_D^{26} = +3.2$  (c = 0.1, CH<sub>2</sub>Cl<sub>2</sub>). <sup>1</sup>H NMR (400 MHz, CDCl<sub>3</sub>)  $\delta = 7.42$  (d,  $J = 8.5$  Hz, 2H), 7.27 (d,  $J = 1.1$  Hz, 1H), 7.17 (d,  $J = 1.0$  Hz, 1H), 7.12 – 7.08 (m, 2H), 5.53 (p,  $J = 6.7$  Hz, 1H), 3.77 (dd,  $J = 9.7, 6.4$  Hz, 1H), 3.33 (t,  $J = 6.3$  Hz, 1H), 2.82 (dd,  $J = 9.7, 6.2$  Hz, 1H), 2.52 – 2.44 (m, 1H), 1.84 – 1.59 (m, 5H), 1.43 (t,  $J = 6.6$  Hz, 6H), 1.31 – 1.17 (m, 5H). <sup>13</sup>C NMR (101 MHz, CDCl<sub>3</sub>)  $\delta = 207.50, 185.51, 142.71, 137.96, 131.75, 129.87, 128.41, 121.31, 120.69, 51.42, 49.36, 39.11, 37.34, 29.75, 28.32, 28.15, 25.91, 25.64, 23.78, 23.53$ . HRMS (APCI)  $m/z$  calcd for C<sub>23</sub>H<sub>28</sub>BrN<sub>2</sub>O<sub>2</sub><sup>+</sup> (M+H)<sup>+</sup>: 443.1296, found 443.1298.

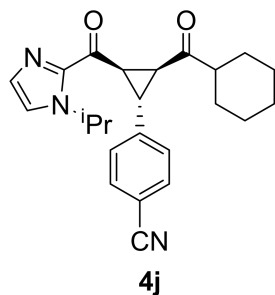

**((1*S*,2*S*,3*R*)-2-(4-cyclohexanecarbonyl)-3-(1-isopropyl-1*H*-imidazole-2-carbonyl)cyclopropyl)benzonitrile (4j).** yellow oil (35.1mg, 90% yield). HPLC: 90% ee (Chiralpak IC column,  $\lambda = 254$  nm, n-hexane/i-PrOH = 80:20, flow rate: 1.0 mL/min, 40 °C, tr (major) = 23.41 min, tr (minor) = 15.26 min.  $[\alpha]_D^{26} = +24.8$  (c = 0.1, CH<sub>2</sub>Cl<sub>2</sub>). <sup>1</sup>H NMR (400 MHz, CDCl<sub>3</sub>)  $\delta = 7.60$  (d,  $J = 8.3$  Hz, 2H), 7.33 (d,  $J = 8.3$  Hz, 2H), 7.28 (s, 1H), 7.18 (s, 1H), 5.52 (p,  $J = 6.7$  Hz, 1H), 3.83 (dd,  $J = 9.9, 6.4$  Hz, 1H), 3.40 (t,  $J = 6.3$  Hz, 1H), 2.89 (dd,  $J = 9.9, 6.2$  Hz, 1H), 2.53 – 2.45 (m, 1H), 1.83 – 1.61 (m, 5H), 1.44 (t,  $J = 6.8$  Hz, 6H), 1.30 – 1.17 (m, 5H). <sup>13</sup>C NMR (101 MHz, CDCl<sub>3</sub>)  $\delta = 207.02, 184.90, 144.65, 142.55, 132.53, 129.99, 127.40, 121.56, 118.85, 110.69, 51.46, 49.45, 39.23, 37.70, 29.89, 28.31, 28.12, 25.87, 25.61, 25.60, 23.78, 23.51$ . HRMS (APCI) m/z calcd for C<sub>24</sub>H<sub>28</sub>N<sub>3</sub>O<sub>2</sub><sup>+</sup> (M+H)<sup>+</sup>: 390.2101, found 390.2099.

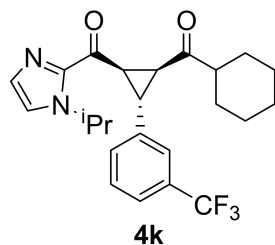

**((1*R*,2*S*,3*S*)-2-(cyclohexanecarbonyl)-3-(3-(trifluoromethyl)phenyl)cyclopropyl)(1-isopropyl-1*H*-imidazol-2-yl)methanone (4k).** colourless solid (41.9 mg, 97% yield); mp 86.7-87.5 °C. HPLC: 90% ee (Chiralpak IC column,  $\lambda = 254$  nm, n-hexane/i-PrOH = 80:20, flow rate: 1.0 mL/min, 40 °C, tr (major) = 8.10 min, tr (minor) = 7.47 min.  $[\alpha]_D^{26} = +10.4$  (c = 0.1, CH<sub>2</sub>Cl<sub>2</sub>). <sup>1</sup>H NMR (400 MHz, CDCl<sub>3</sub>)  $\delta = 7.56$  (d,  $J = 8.1$  Hz, 2H), 7.34 (d,  $J = 8.1$  Hz, 2H), 7.28 (s, 1H), 7.18 (s, 1H), 5.53 (p,  $J = 6.7$  Hz, 1H), 3.84 (dd,  $J = 9.8, 6.4$  Hz, 1H), 3.42 (t,  $J = 6.3$  Hz, 1H), 2.89 (dd,  $J = 9.8, 6.2$  Hz, 1H), 2.54 – 2.45 (m, 1H), 1.90 – 1.64 (m, 5H), 1.44 (t,  $J = 6.4$  Hz, 6H), 1.31 – 1.14 (m, 5H). <sup>13</sup>C NMR (101 MHz, CDCl<sub>3</sub>)  $\delta = 207.31, 185.26, 143.10, 142.66,$

129.93, 126.97, 125.71, 125.67, 125.63, 125.59, 121.41, 51.46, 49.40, 39.20, 37.55, 29.82, 28.32, 28.14, 25.89, 25.63, 25.62, 23.77, 23.62, 23.51.  $^{19}\text{F}$  NMR (376 MHz,  $\text{CDCl}_3$ )  $\delta = 62.37$ . HRMS (APCI)  $m/z$  calcd for  $\text{C}_{24}\text{H}_{28}\text{F}_3\text{N}_2\text{O}_2^+$  ( $\text{M}+\text{H}$ ) $^+$ : 433.1999, found 433.2001.

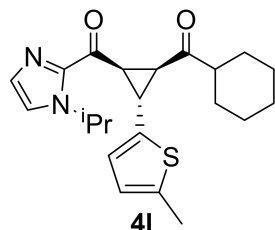

**((1S,2R,3S)-2-(cyclohexanecarbonyl)-3-(5-methylthiophen-2-yl)cyclopropyl)(1-isopropyl-1H-imidazol-2-yl)methanone (4l)**. yellow oil (34.6 mg, 90% yield). HPLC: 64% ee (Chiralpak IC column,  $\lambda = 254$  nm, n-hexane/*i*-PrOH = 80:20, flow rate: 1.0 mL/min, 40 °C,  $t_r$  (major) = 14.78 min,  $t_r$  (minor) = 11.58 min.  $[\alpha]_{\text{D}}^{26} = -9.6$  ( $c = 0.1$ ,  $\text{CH}_2\text{Cl}_2$ ).  $^1\text{H}$  NMR (400 MHz,  $\text{CDCl}_3$ )  $\delta = 7.26$  (s, 1H), 7.17 (s, 1H), 6.69 (d,  $J = 3.4$  Hz, 1H), 6.55 (d,  $J = 3.5$  Hz, 1H), 5.53 (p,  $J = 6.6$  Hz, 1H), 3.74 (dd,  $J = 9.7, 6.3$  Hz, 1H), 3.45 (t,  $J = 6.2$  Hz, 1H), 2.82 (dd,  $J = 9.7, 6.1$  Hz, 1H), 2.42 (s, 3H), 1.91 – 1.66 (m, 5H), 1.43 (dd,  $J = 8.2, 6.7$  Hz, 6H), 1.32 – 1.13 (m, 5H).  $^{13}\text{C}$  NMR (101 MHz,  $\text{CDCl}_3$ )  $\delta = 207.62, 185.54, 142.77, 140.33, 138.27, 129.86, 125.07, 124.33, 121.21, 51.43, 49.35, 40.00, 38.26, 28.31, 28.17, 26.22, 25.97, 25.70, 25.68, 23.82, 23.58, 15.46$ . HRMS (APCI)  $m/z$  calcd for  $\text{C}_{22}\text{H}_{29}\text{N}_2\text{O}_2\text{S}^+$  ( $\text{M}+\text{H}$ ) $^+$ : 385.1904, found 385.1905.

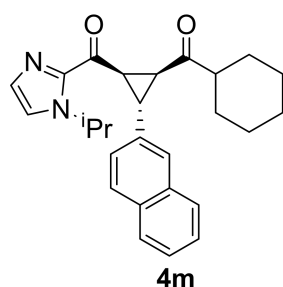

**((1R,2S,3S)-2-(cyclohexanecarbonyl)-3-(naphthalen-2-yl)cyclopropyl)(1-isopropyl-1H-imidazol-2-yl)methanone (4m)**. yellow oil (39.8 mg, 96% yield). HPLC: 98% ee (Chiralpak IC column,  $\lambda = 254$  nm, n-hexane/*i*-PrOH = 80:20, flow rate: 1.0 mL/min, 40 °C,  $t_r$  (major) = 9.80 min,  $t_r$  (minor) = 8.72 min.  $[\alpha]_{\text{D}}^{26} = -3.6$  ( $c = 0.1$ ,

CH<sub>2</sub>Cl<sub>2</sub>). <sup>1</sup>H NMR (400 MHz, CDCl<sub>3</sub>) δ = 8.30 (d, *J* = 8.1 Hz, 1H), 7.85 (d, *J* = 8.1 Hz, 1H), 7.76 (d, *J* = 7.4 Hz, 1H), 7.57 – 7.47 (m, 2H), 7.39 (d, *J* = 7.5 Hz, 2H), 7.27 (d, *J* = 6.3 Hz, 1H), 7.19 (s, 1H), 5.62 (p, *J* = 6.6 Hz, 1H), 3.93 (d, *J* = 8.1 Hz, 2H), 2.95 – 2.90 (m, 1H), 2.58 – 2.50 (m, 1H), 1.92 – 1.58 (m, 5H), 1.46 (dd, *J* = 12.1, 6.7 Hz, 6H), 1.38 – 1.13 (m, 5H). <sup>13</sup>C NMR (101 MHz, CDCl<sub>3</sub>) δ = 208.33, 186.27, 142.85, 134.73, 133.65, 133.04, 129.88, 128.53, 127.86, 126.51, 126.06, 125.40, 124.42, 123.94, 121.25, 51.67, 49.36, 37.51, 36.32, 28.55, 28.33, 28.17, 25.94, 25.73, 25.64, 23.90, 23.52. HRMS (APCI) *m/z* calcd for C<sub>27</sub>H<sub>31</sub>N<sub>2</sub>O<sub>2</sub><sup>+</sup> (M+H)<sup>+</sup>: 415.2301, found 415.2299.

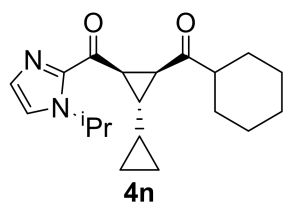

**((1*S*,2*R*,3*S*)-3-(cyclohexanecarbonyl)-[1,1'-bi(cyclopropan)]-2-yl)(1-isopropyl-1H-imidazol-2-yl)methanone (4n)**. colourless oil (29.6 mg, 90% yield). HPLC: 81% ee (Chiralpak IC column, λ = 254 nm, n-hexane/i-PrOH = 80:20, flow rate: 1.0 mL/min, 40 °C, tr (major) = 10.51 min, tr (minor) = 7.57 min. [α]<sub>D</sub><sup>26</sup> = +13.2 (c = 0.1, CH<sub>2</sub>Cl<sub>2</sub>). <sup>1</sup>H NMR (400 MHz, CDCl<sub>3</sub>) δ = 7.23 (d, *J* = 1.1 Hz, 1H), 7.16 (d, *J* = 1.1 Hz, 1H), 5.51 (p, *J* = 6.7 Hz, 1H), 3.26 (dd, *J* = 9.5, 6.3 Hz, 1H), 2.46 – 2.36 (m, 2H), 2.33 – 2.25 (m, 1H), 1.87 – 1.65 (m, 5H), 1.41 (dd, *J* = 12.3, 6.7 Hz, 6H), 1.32 – 1.14 (m, 5H), 0.99 – 0.91 (m, 1H), 0.49 (dd, *J* = 5.2, 4.4 Hz, 2H), 0.27 – 0.22 (m, 2H). <sup>13</sup>C NMR (101 MHz, CDCl<sub>3</sub>) δ = 208.71, 186.91, 142.97, 129.61, 120.93, 51.39, 49.35, 49.23, 35.93, 34.42, 29.37, 28.42, 28.28, 25.99, 25.73, 23.81, 23.58, 11.36, 3.56, 3.48. HRMS (APCI) *m/z* calcd for C<sub>20</sub>H<sub>29</sub>FN<sub>2</sub>O<sub>2</sub><sup>+</sup> (M+H)<sup>+</sup>: 329.2199, found 329.2197.



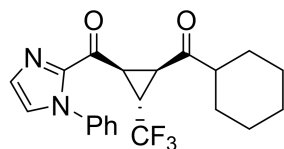

**4o**

**((1*S*,2*R*,3*S*)-2-(cyclohexanecarbonyl)-3-(trifluoromethyl)cyclopropyl)(1-phenyl-1*H*-imidazol-2-yl)methanone (4o)**. colourless solid (33.2 mg, 85% yield); mp 69.2-71.3 °C. HPLC: 75% ee (Chiralpak IC column,  $\lambda = 254$  nm, n-hexane/*i*-PrOH = 80:20, flow rate: 1.0 mL/min, 40 °C,  $t_r$  (major) = 6.98 min,  $t_r$  (minor) = 6.11 min.  $[\alpha]_D^{26} = -7.0$  ( $c = 0.1$ ,  $\text{CH}_2\text{Cl}_2$ ).  $^1\text{H}$  NMR (400 MHz,  $\text{CDCl}_3$ )  $\delta = 7.45$  (dd,  $J = 5.0, 1.9$  Hz, 3H), 7.32 – 7.28 (m, 3H), 7.20 (d,  $J = 1.0$  Hz, 1H), 3.62 (dd,  $J = 10.2, 6.2$  Hz, 1H), 2.95 – 2.85 (m, 2H), 2.52 – 2.46 (m, 1H), 1.86 – 1.65 (m, 5H), 1.34 – 1.18 (m, 5H).  $^{13}\text{C}$  NMR (101 MHz,  $\text{CDCl}_3$ )  $\delta = 205.88, 181.62, 142.65, 137.90, 131.14, 130.21, 129.17, 129.02, 128.27, 127.51, 126.09, 125.87, 123.31, 51.42, 31.00, 30.41, 28.16, 27.90, 25.84, 25.58, 25.52$ .  $^{19}\text{F}$  NMR (376 MHz,  $\text{CDCl}_3$ )  $\delta = 66.6$ . HRMS (APCI)  $m/z$  calcd for  $\text{C}_{21}\text{H}_{22}\text{F}_3\text{N}_2\text{O}_2^+$  ( $\text{M}+\text{H}$ ) $^+$ : 391.1599, found 391.1602.

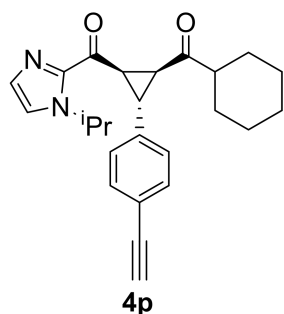

**4p**

**((1*R*,2*S*,3*S*)-2-(cyclohexanecarbonyl)-3-(4-ethynylphenyl)cyclopropyl)(1-isopropyl-1*H*-imidazol-2-yl)methanone (4p)**. colourless oil (35.7 mg, 92% yield). HPLC: 90% ee (Chiralpak IC column,  $\lambda = 254$  nm, n-hexane/*i*-PrOH = 80:20, flow rate: 1.0 mL/min, 40 °C,  $t_r$  (major) = 8.31 min,  $t_r$  (minor) = 5.75 min.  $[\alpha]_D^{26} = +15.6$  ( $c = 0.1$ ,  $\text{CH}_2\text{Cl}_2$ ).  $^1\text{H}$  NMR (400 MHz,  $\text{CDCl}_3$ )  $\delta = 7.43$  (d,  $J = 8.3$  Hz, 2H), 7.26 (s, 1H), 7.20 – 7.16 (m, 3H), 5.53 (p,  $J = 6.7$  Hz, 1H), 3.80 (dd,  $J = 9.7, 6.4$  Hz, 1H), 3.36 (t,  $J = 6.3$  Hz, 1H), 3.07 (s, 1H), 2.85 (dd,  $J = 9.8, 6.2$  Hz, 1H), 2.53 – 2.45 (m, 1H), 1.87 – 1.63 (m, 5H), 1.45 – 1.40 (m, 6H), 1.34 – 1.16 (m, 5H).  $^{13}\text{C}$  NMR (101 MHz,  $\text{CDCl}_3$ )  $\delta = 207.47, 185.51, 142.72, 139.81, 132.44, 129.84, 126.60, 121.28, 120.64, 83.48,$

51.41, 49.34, 49.21, 39.29, 37.48, 30.17, 28.30, 28.15, 25.90, 25.63, 23.77, 23.52.

HRMS (APCI) m/z calcd for  $C_{25}H_{29}N_2O_2^+$  (M+H)<sup>+</sup>: 389.2199, found 389.2202.

## VI Gram-scale Experiments and Synthetic Transformations

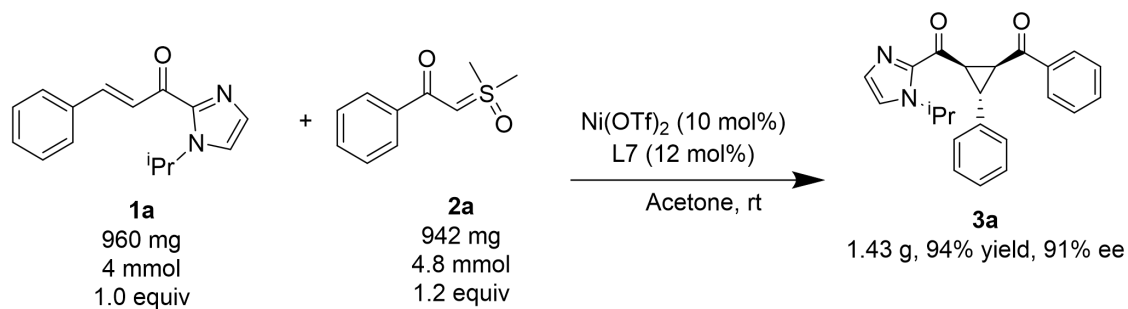

An oven-dried 100 mL Schlenk tube, fitted with a magnetic stirring bar, was charged with  $\text{Ni}(\text{OTf})_2$  (144 mg, 10 mol%) in an Ar setting, followed by the addition of **L7** (320 mg, 12 mol%) and Acetone (40 mL, 0.1 M), with the mixture being stirred at room temperature for an hour. Following this, **1a** (960 mg, 4.0 mmol, 1.0 equiv.) and **2a** (942 mg, 4.8 mmol, 1.2 equiv.) were added. The reaction mixture was stirred at 25°C for indicated time (monitored by TLC) under argon. The mixture was purified by flash column chromatography on silica gel (petroleum ether/ EtOAc = 10:1 to 5:1) to afford products the respective products **3a** (yellow oil, 1430 mg, 94% yield, 91% ee).

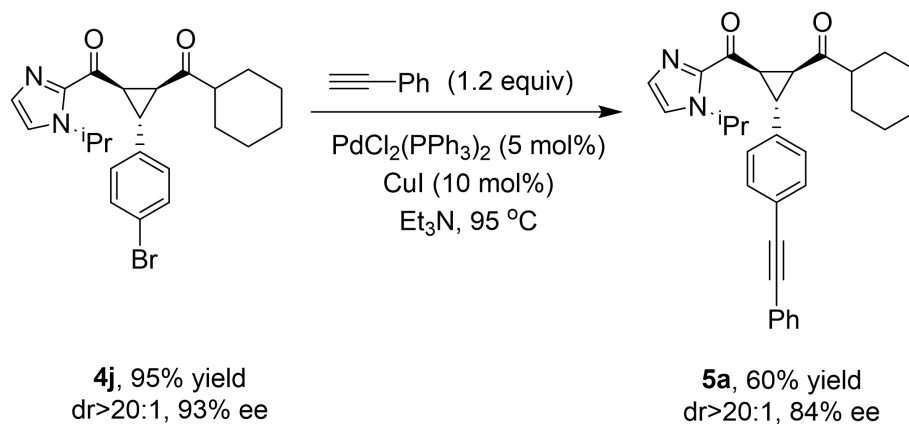

To a dry flask under argon containing **4j** (44.2 mg, 0.1 mmol, 1.0 equiv.) was sequentially added  $\text{Et}_3\text{N}$  (1.0 mL), phenyl acetylene (13.0  $\mu\text{L}$ , 0.12 mmol, 1.2 equiv.),  $\text{PdCl}_2(\text{PPh}_3)_2$  (2.0 mg, 0.005 mmol, 0.05 equiv.),  $\text{CuI}$  (2.0 mg, 0.01 mmol, 0.1 equiv.). The mixture was stirred for 12 h at 95 °C in a pre-heated oil bath. Then the mixture was filtered through a pad of celite. Removal of solvent under reduced pressure afforded a residue which is purified by column chromatography on silica gel eluting with ethyl-acetate: hexane (10 – 12 %) to afford compound **5a** with 60% yield. HPLC: 84% ee (Chiralpak IA column,  $\lambda = 254 \text{ nm}$ , n-hexane/*i*-PrOH = 70:30, flow rate: 1.0

mL/min, 40 °C, tr (major) = 13.53 min, tr (minor) = 7.19 min.  $[\alpha]_D^{26} = +5.6$  (c = 0.1, CH<sub>2</sub>Cl<sub>2</sub>). <sup>1</sup>H NMR (400 MHz, CDCl<sub>3</sub>)  $\delta$  = 7.48 – 7.43 (m, 2H), 7.40 (d, *J* = 8.3 Hz, 2H), 7.30 – 7.25 (m, 3H), 7.19 (s, 1H), 7.15 – 7.10 (m, 3H), 5.47 (p, *J* = 6.7 Hz, 1H), 3.75 (dd, *J* = 9.7, 6.4 Hz, 1H), 3.31 (t, *J* = 6.3 Hz, 1H), 2.80 (dd, *J* = 9.8, 6.2 Hz, 1H), 2.42 (t, *J* = 10.9 Hz, 1H), 1.79 – 1.57 (m, 5H), 1.36 (dd, *J* = 6.7, 5.4 Hz, 6H), 1.27 – 1.10 (m, 5H). <sup>13</sup>C NMR (101 MHz, CDCl<sub>3</sub>)  $\delta$  = 207.56, 185.61, 142.77, 139.22, 131.93, 131.69, 129.85, 128.45, 128.35, 126.66, 123.35, 121.85, 121.28, 89.72, 89.26, 51.44, 49.36, 39.40, 37.52, 30.31, 28.33, 28.19, 25.93, 25.66, 23.79, 23.55. HRMS (APCI) *m/z* calcd for C<sub>31</sub>H<sub>33</sub>N<sub>2</sub>O<sub>2</sub><sup>+</sup> (M+H)<sup>+</sup>: 465.2504, found 465.2506.

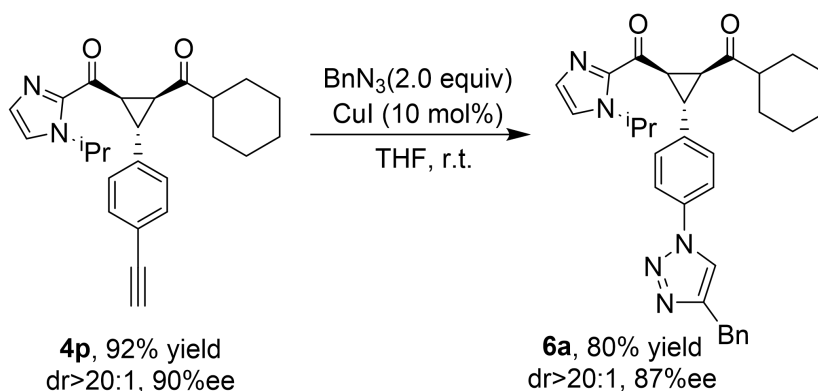

An oven-dried 25 mL Schlenk tube was charged with **4p** (38.8 mg, 0.1 mmol), benzylazide (55.7 mg, 0.4 mmol), and CuI (19.0 mg, 10 mol%) in THF (1 mL, 1.0 M solution). The reaction was stirred at room temperature for 30 min, concentrated in vacuum. The concentrate was then purified by silica gel chromatography (PE/EtOAc = 5/1-2:1) to afford **6a** colorless oil (80% yield). HPLC: 87% ee (Chiralpak IC column,  $\lambda$  = 254 nm, n-hexane/*i*-PrOH = 70:30, flow rate: 1.0 mL/min, 40 °C, tr (major) = 9.24 min, tr (minor) = 8.09 min.  $[\alpha]_D^{26} = +10.6$  (c = 0.1, CH<sub>2</sub>Cl<sub>2</sub>). <sup>1</sup>H NMR (400 MHz, CDCl<sub>3</sub>)  $\delta$  = 7.65 (d, *J* = 8.3 Hz, 2H), 7.60 (s, 1H), 7.27 (d, *J* = 7.1 Hz, 3H), 7.23 – 7.14 (m, 5H), 7.08 (s, 1H), 5.53 – 5.40 (m, 3H), 3.74 (dd, *J* = 9.7, 6.4 Hz, 1H), 3.30 (t, *J* = 6.3 Hz, 1H), 2.79 (dd, *J* = 9.8, 6.2 Hz, 1H), 2.46 – 2.36 (m, 1H), 1.78 – 1.49 (m, 5H), 1.33 (t, *J* = 6.3 Hz, 6H), 1.24 – 1.06 (m, 5H). <sup>13</sup>C NMR (101 MHz, CDCl<sub>3</sub>)  $\delta$  = 207.54, 185.59, 171.08, 147.76, 142.64, 138.72, 134.70, 129.71, 129.20, 129.10, 128.71, 128.02, 126.94, 125.85, 121.18, 119.53, 60.34, 54.15, 51.26, 49.20, 39.25,

37.33, 30.09, 28.18, 28.06, 25.79, 25.51, 23.64, 23.39, 21.02, 14.18. HRMS (APCI)  
m/z calcd for  $C_{32}H_{36}N_5O_2^+$  (M+H)<sup>+</sup>: 522.2824, found 522.2823.

# VII NMR Spectra

## <sup>1</sup>H NMR-L6 (400 MHz, CD<sub>3</sub>OD)

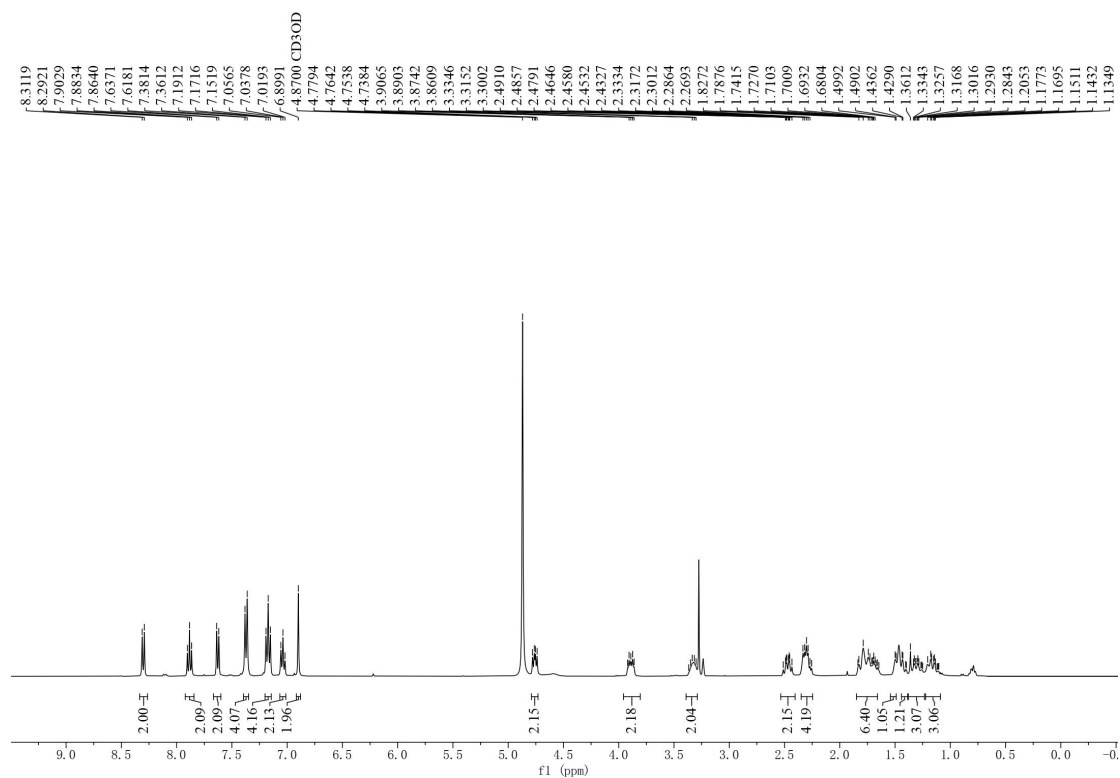

## <sup>13</sup>C NMR-L6 (101 MHz, CD<sub>3</sub>OD)

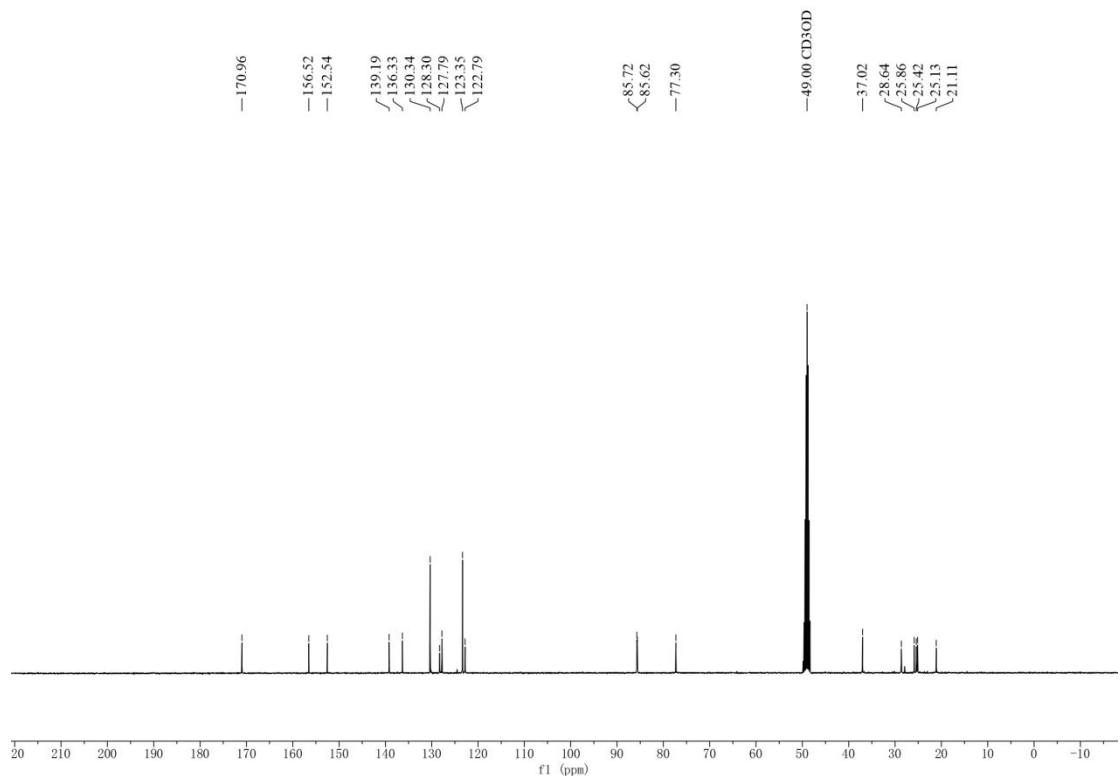

### <sup>1</sup>H NMR-L7 (400 MHz, CD<sub>3</sub>OD)

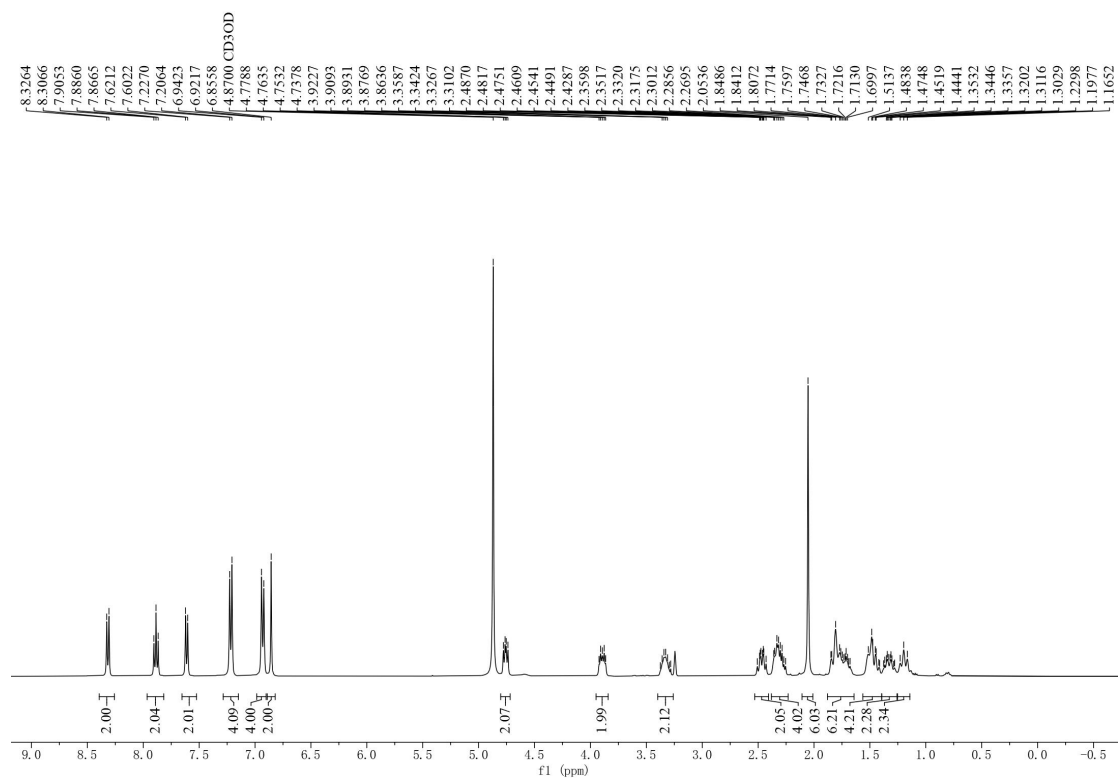

### <sup>13</sup>C NMR-L7 (101 MHz, CD<sub>3</sub>OD)

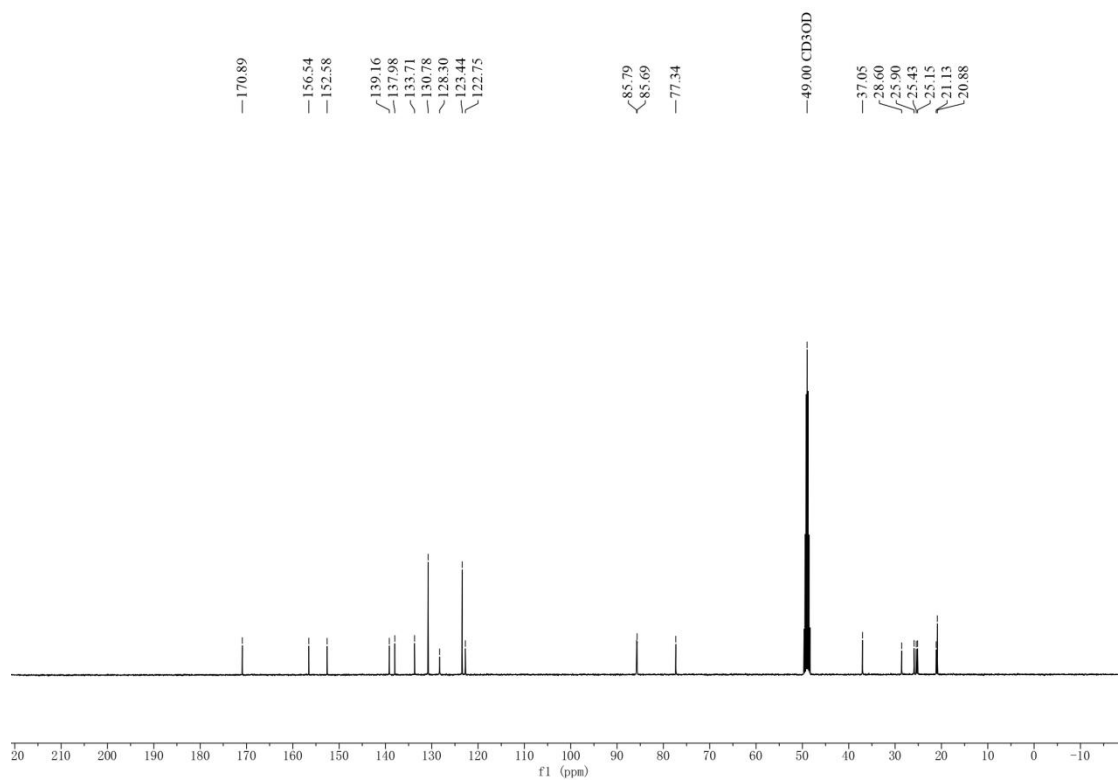

### <sup>1</sup>H NMR-L8 (400 MHz, CD<sub>3</sub>OD)

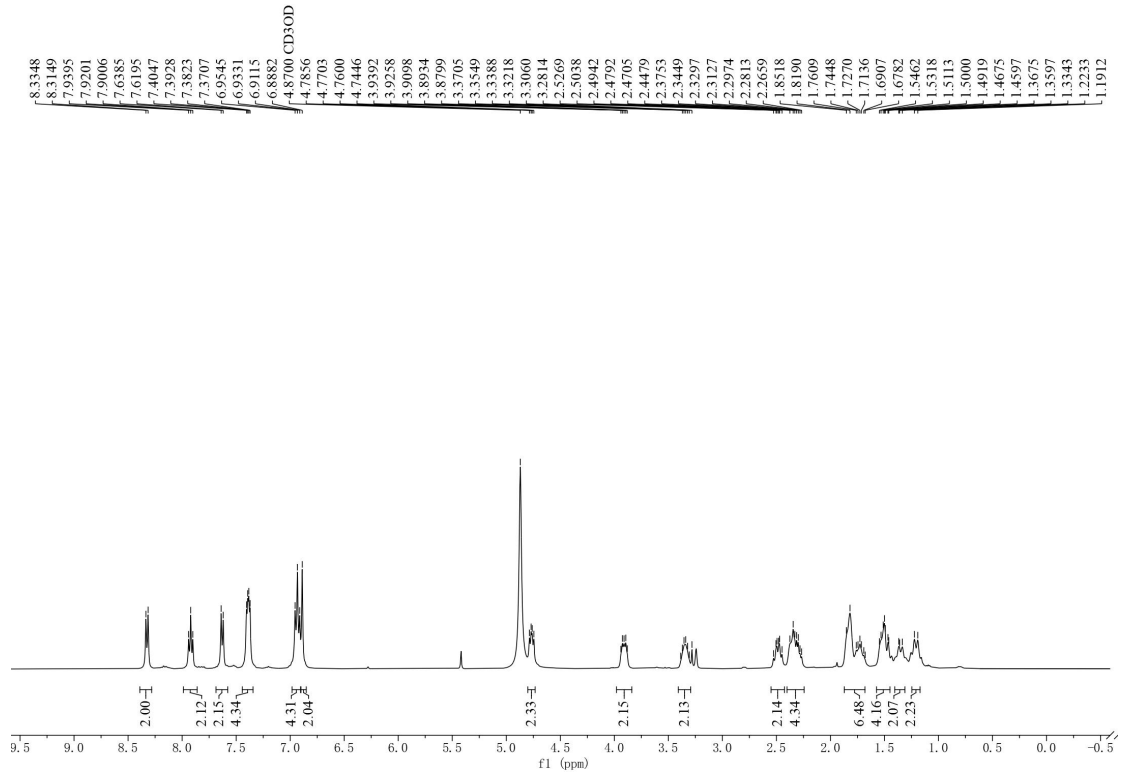

### <sup>13</sup>C NMR-L8 (101 MHz, CD<sub>3</sub>OD)

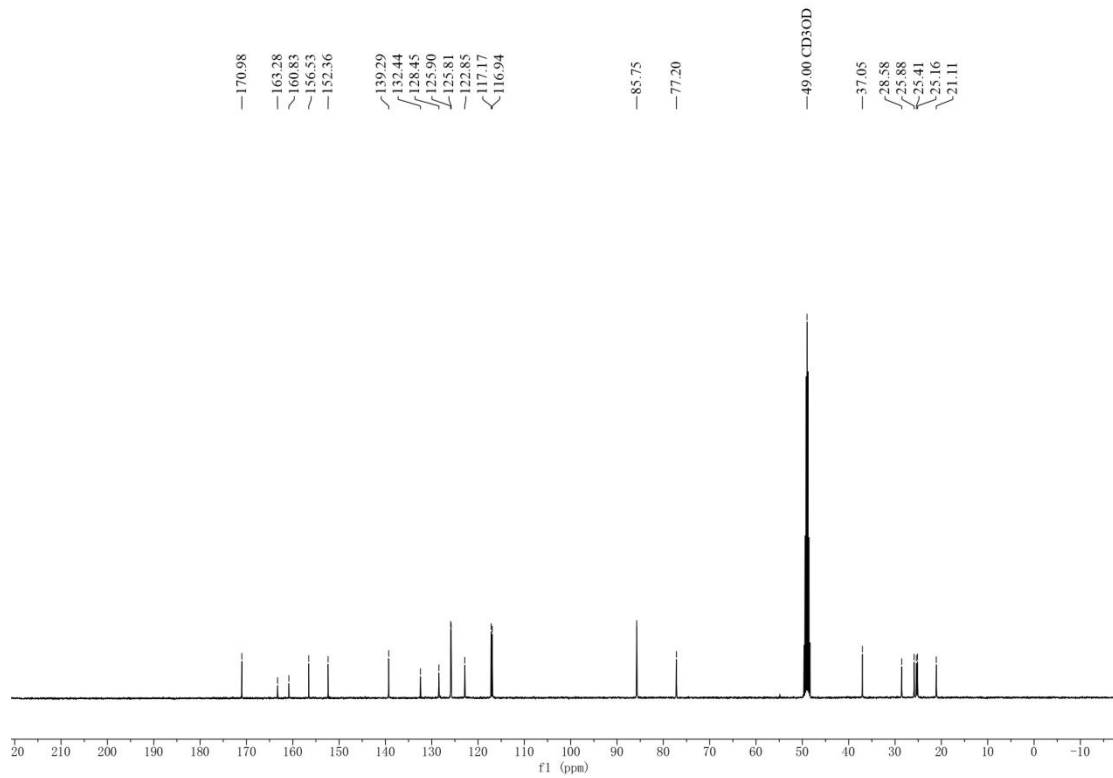



**$^{19}\text{F}$  NMR-L8 (376 MHz,  $\text{CD}_3\text{OD}$ )**

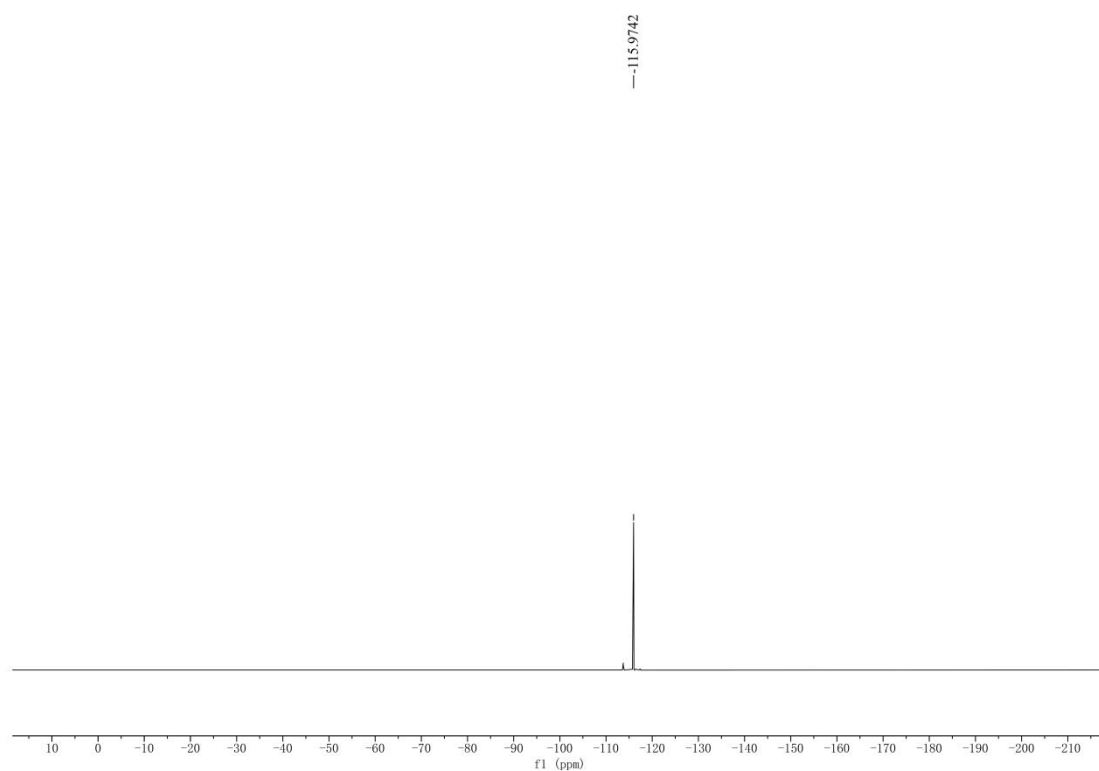

# <sup>1</sup>H NMR-L9 (400 MHz, CD<sub>3</sub>OD)

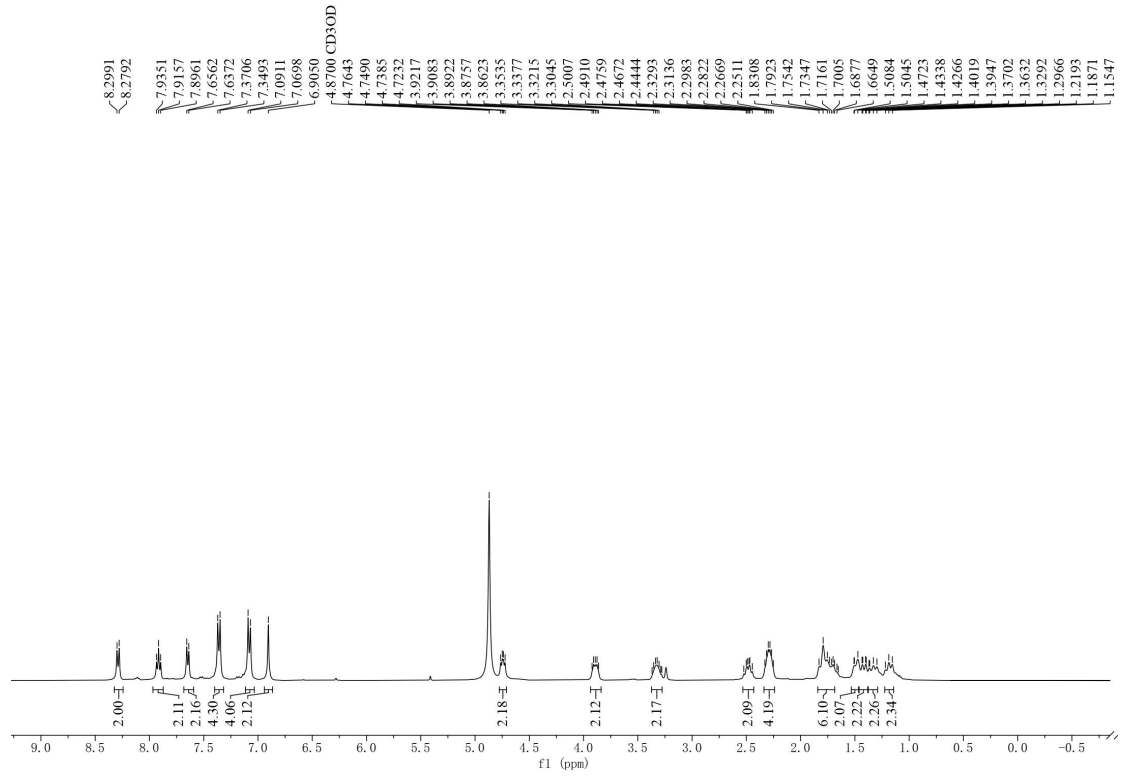

# <sup>13</sup>C NMR-L9 (101 MHz, CD<sub>3</sub>OD)

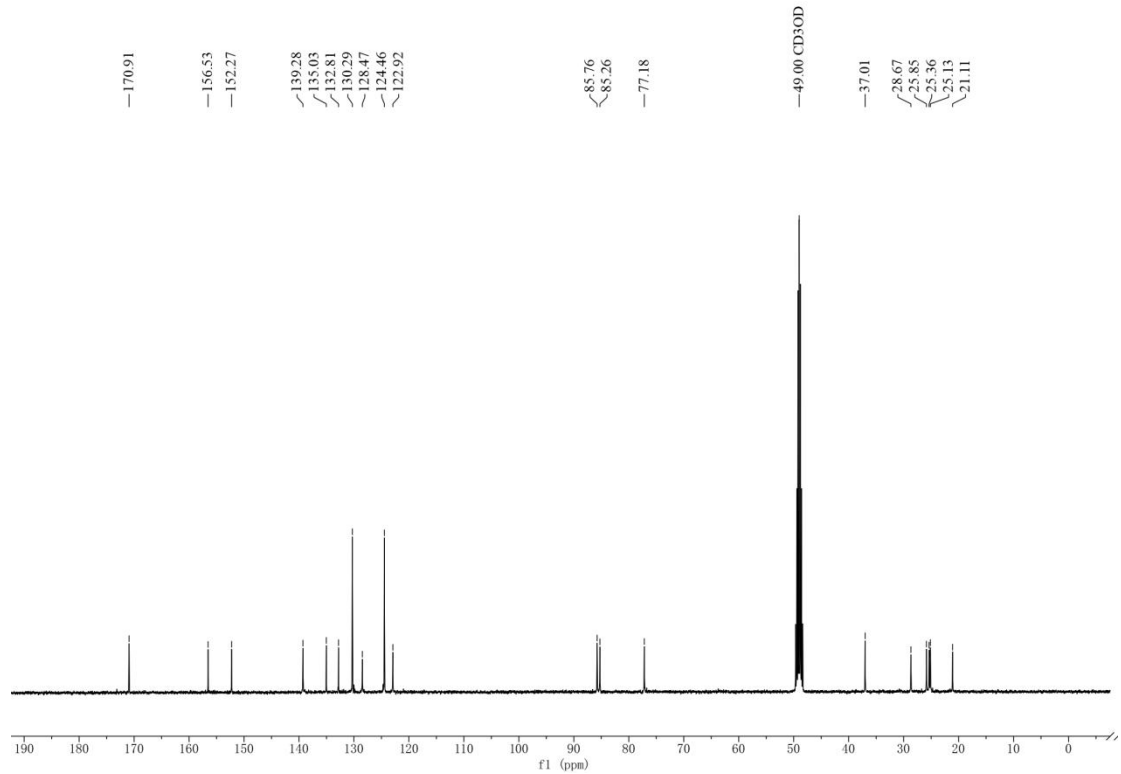

# <sup>1</sup>H NMR-L10 (400 MHz, CD<sub>3</sub>OD)

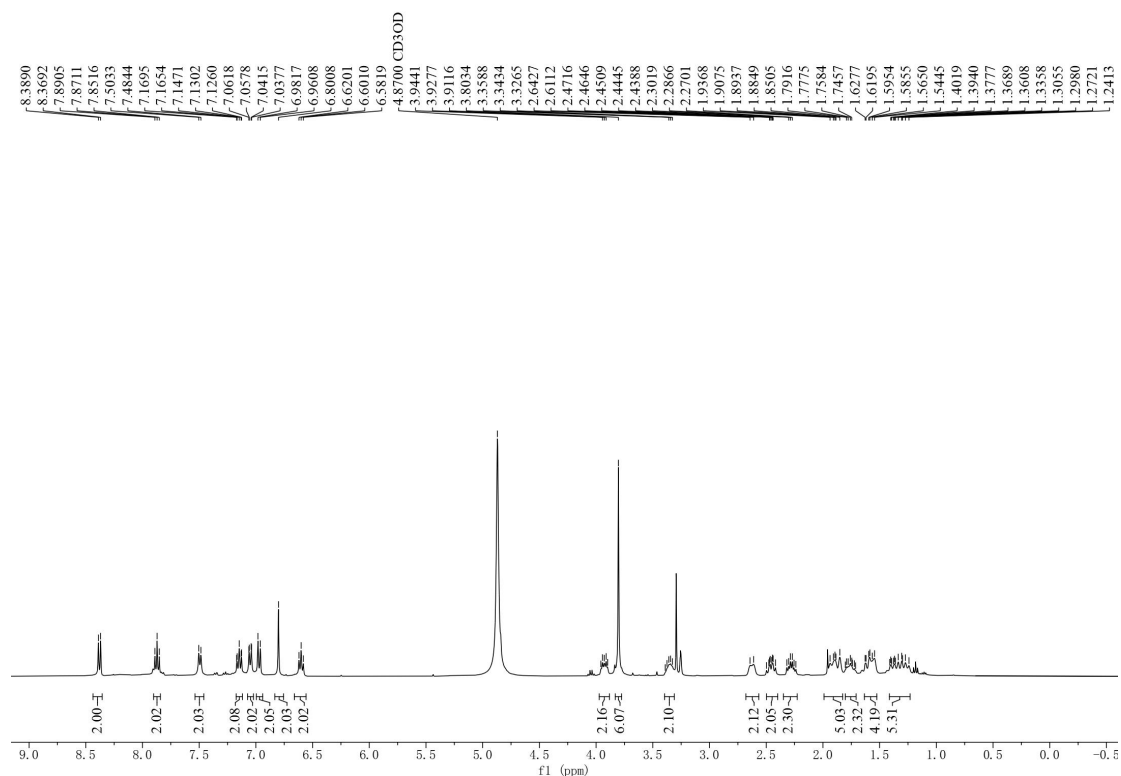

# <sup>13</sup>C NMR-L10 (100 MHz, CD<sub>3</sub>OD)

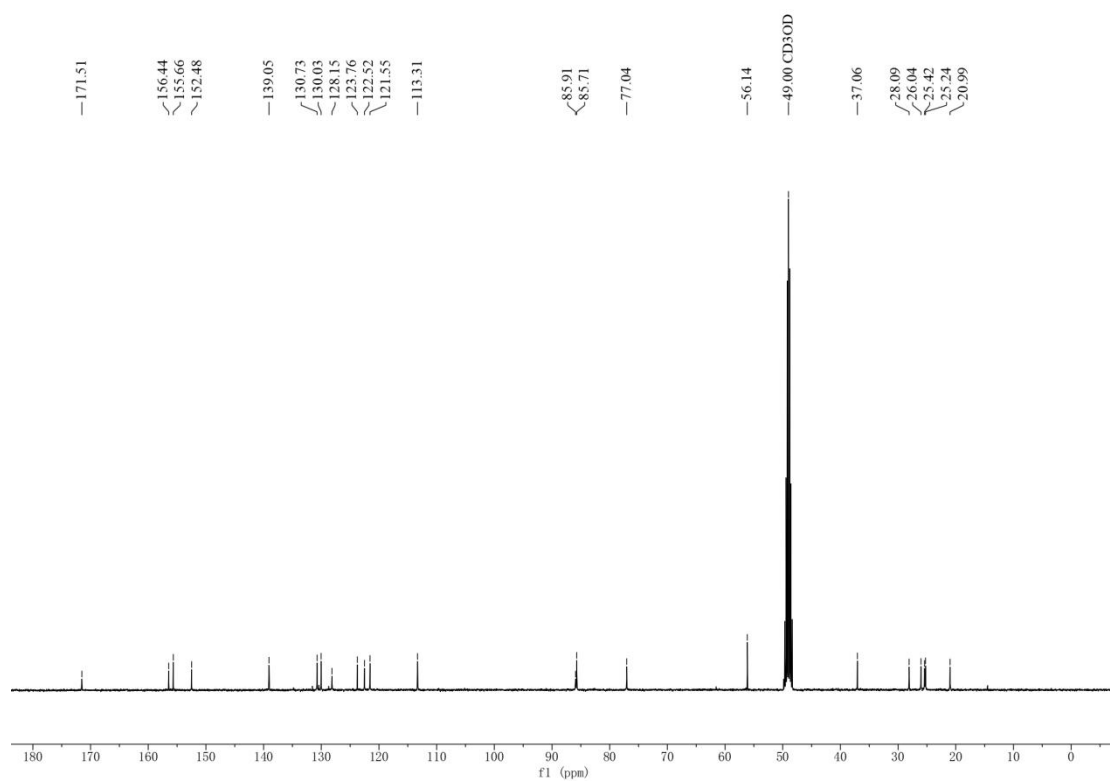

# <sup>1</sup>H NMR-L11 (400 MHz, CD<sub>3</sub>OD)

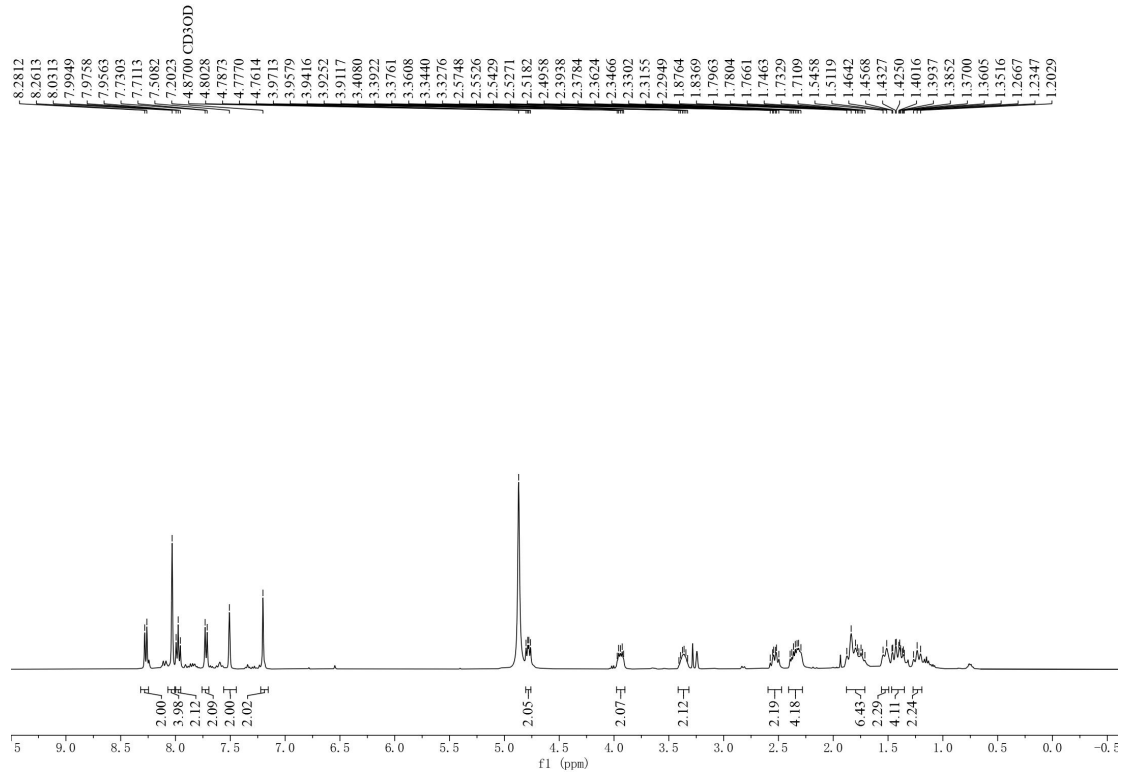

# <sup>13</sup>C NMR-L11 (101 MHz, CD<sub>3</sub>OD)

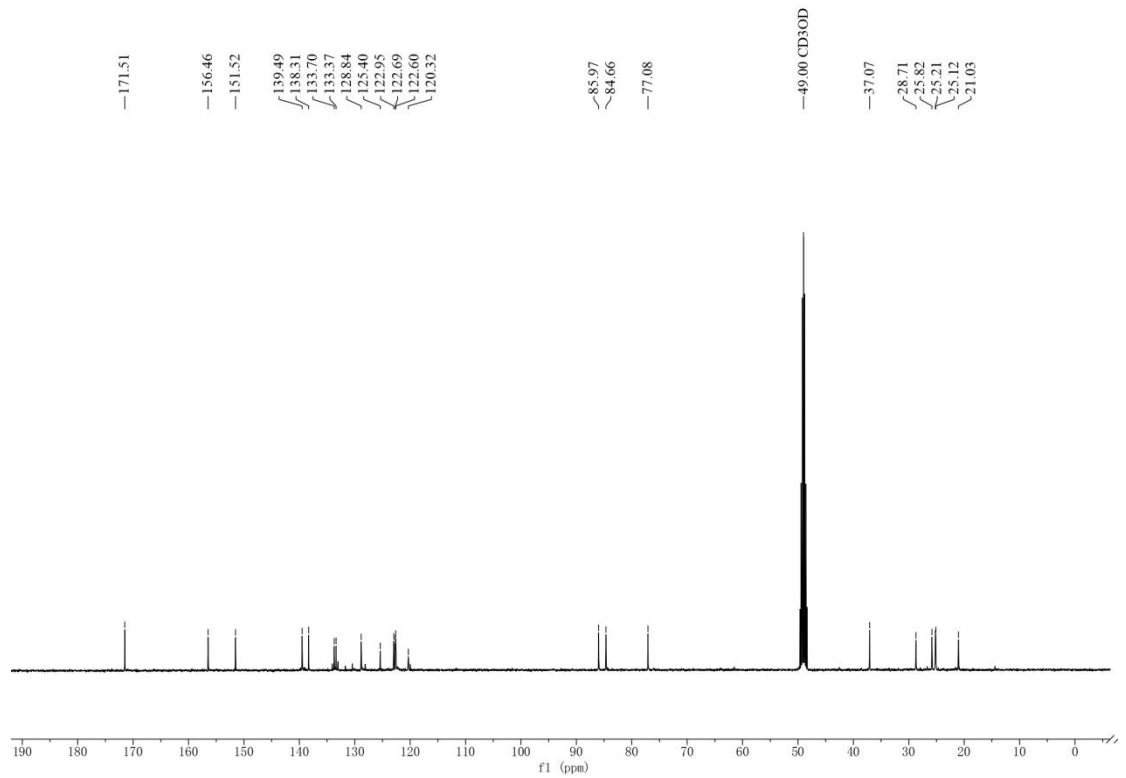

**$^{19}\text{F}$  NMR-L11 (376 MHz,  $\text{CD}_3\text{OD}$ )**

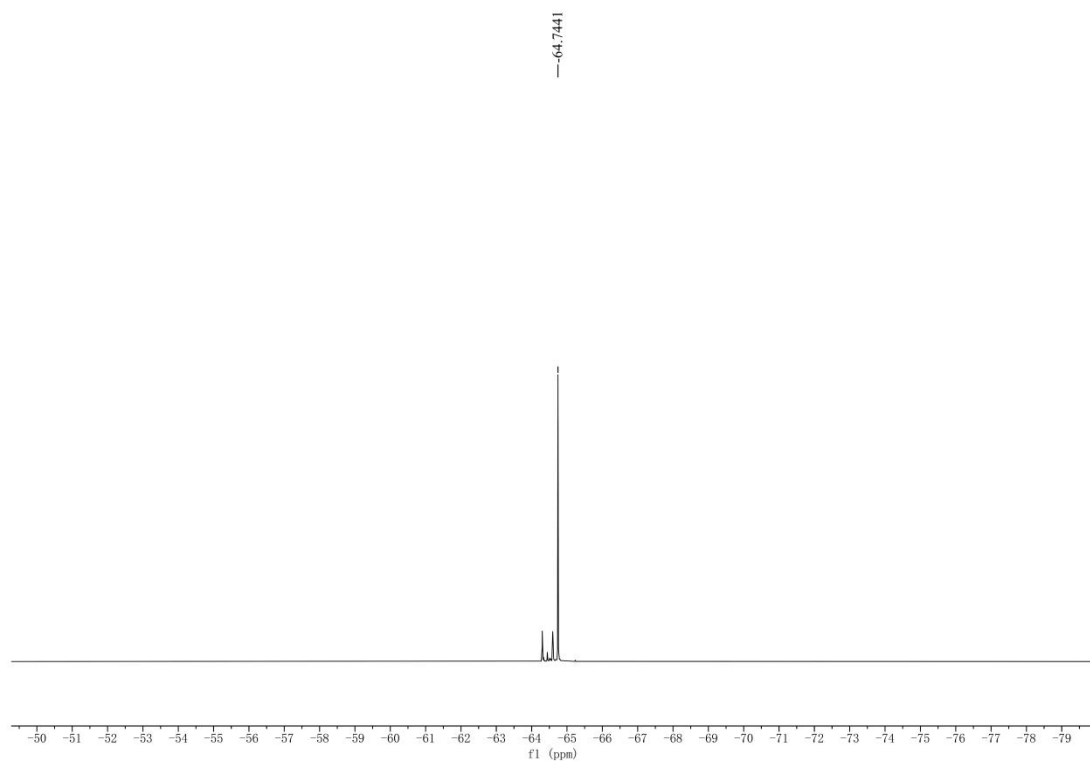

### <sup>1</sup>H NMR-3a (400 MHz, CDCl<sub>3</sub>)

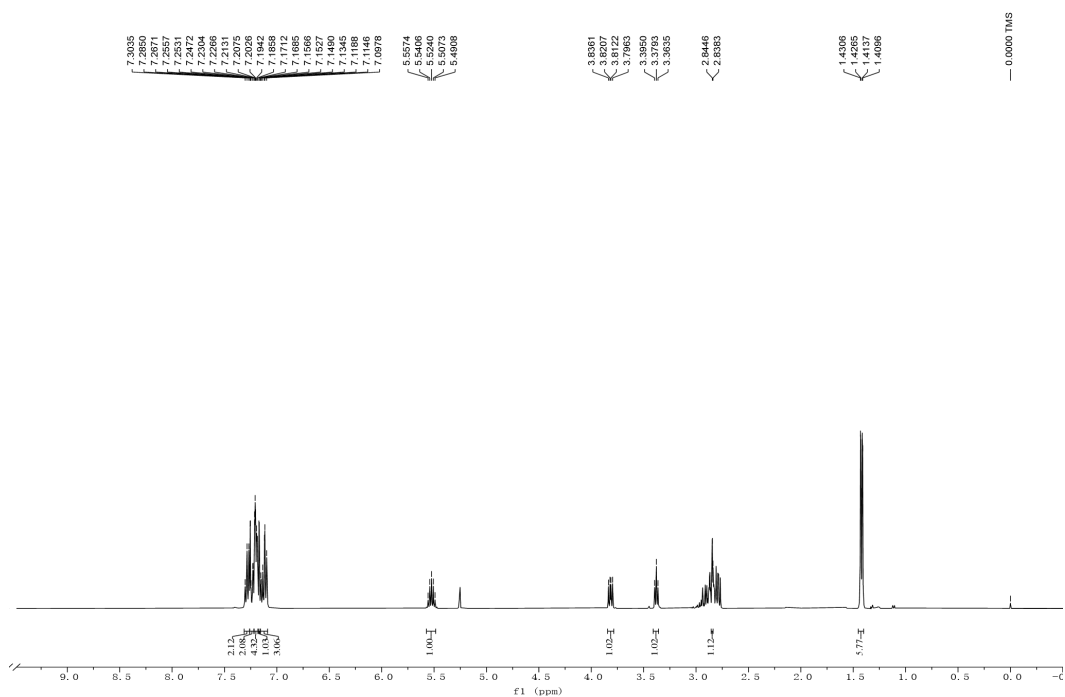

### <sup>13</sup>C NMR-3a (101 MHz, CDCl<sub>3</sub>)

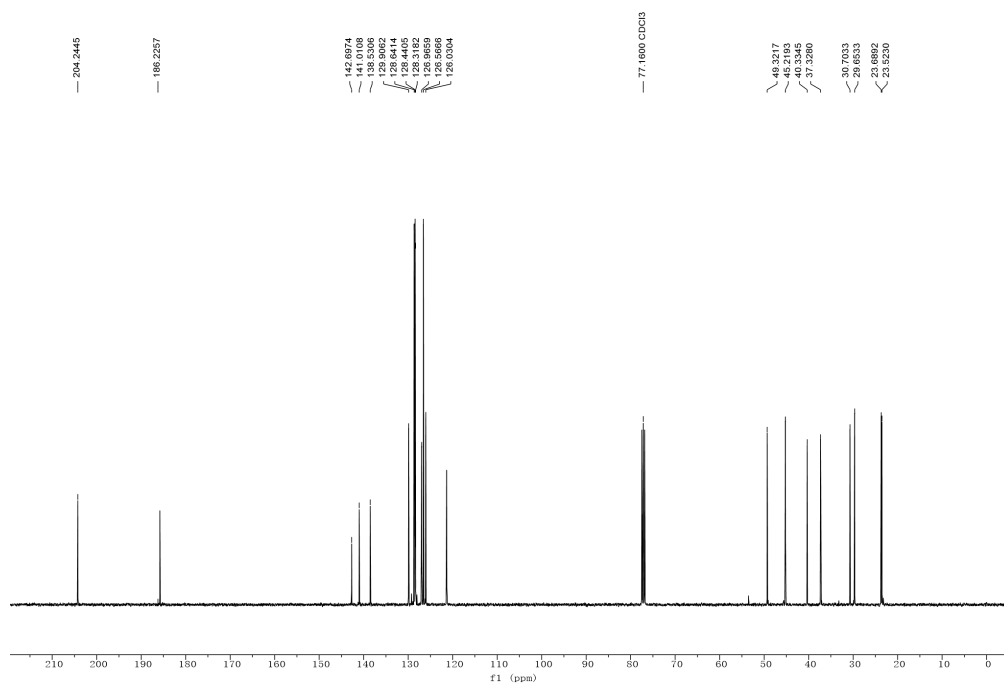

### <sup>1</sup>H NMR-3b (400 MHz, CDCl<sub>3</sub>)

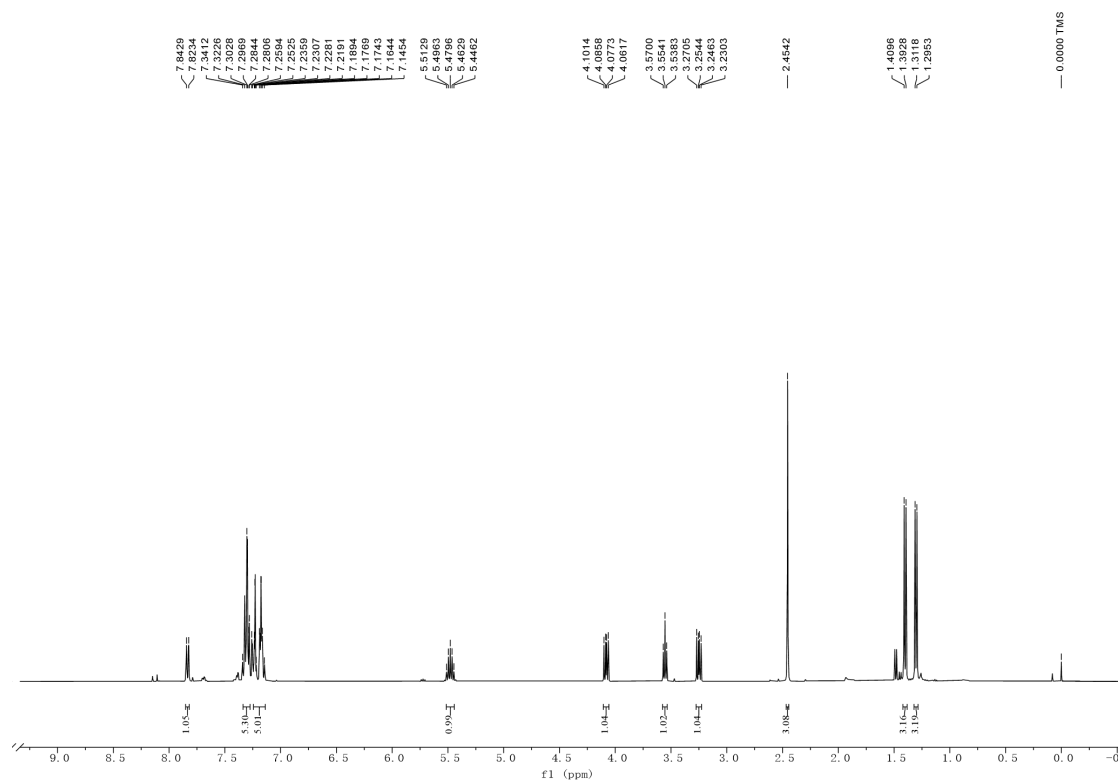

### <sup>13</sup>C NMR-3b (101 MHz, CDCl<sub>3</sub>)

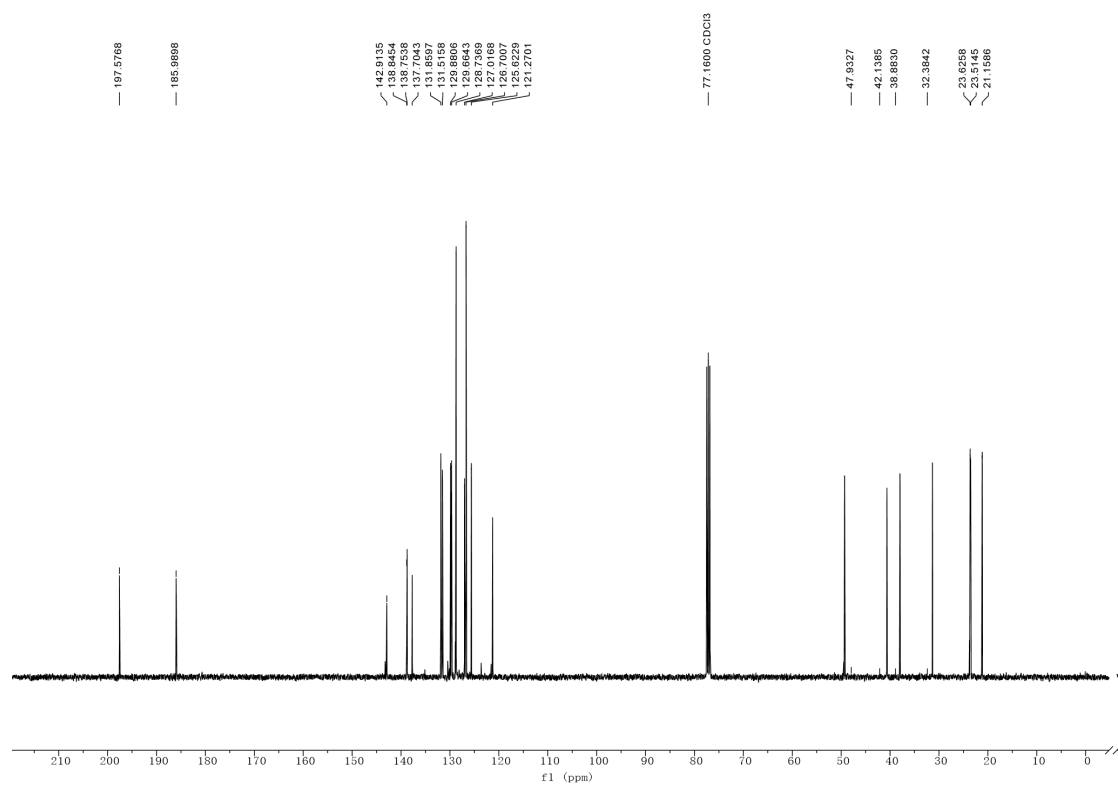

### <sup>1</sup>H NMR-3c (400 MHz, CDCl<sub>3</sub>)

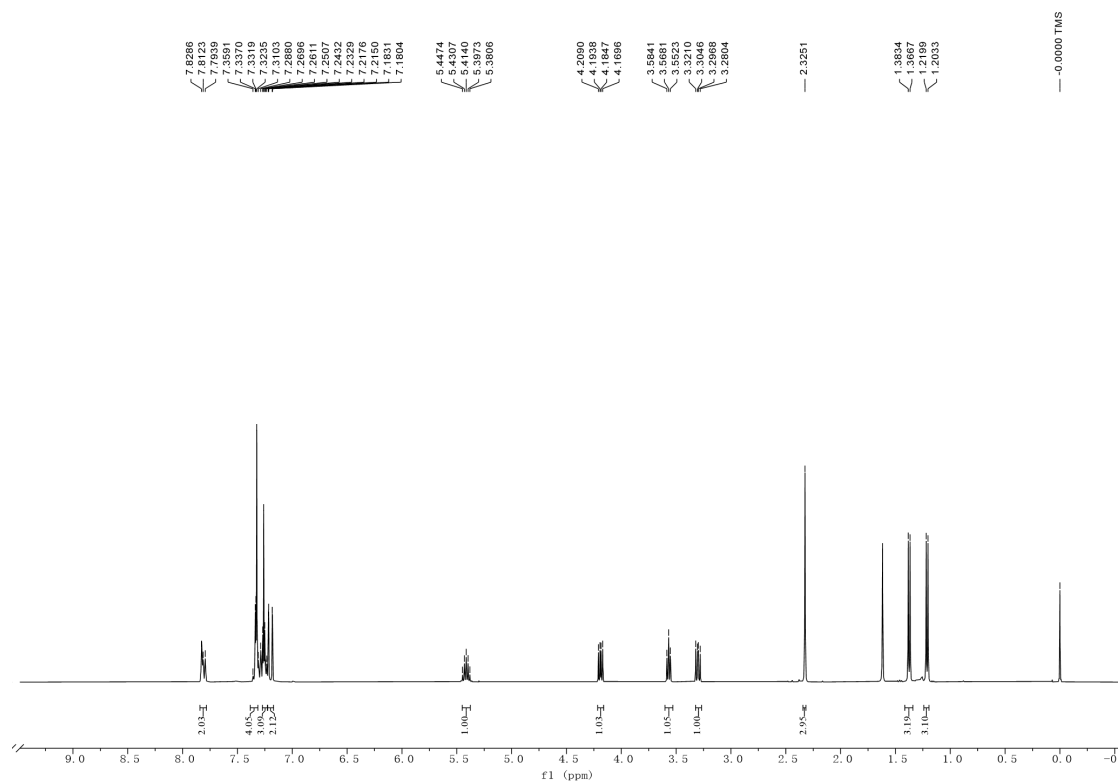

### <sup>13</sup>C NMR-3c (101 MHz, CDCl<sub>3</sub>)

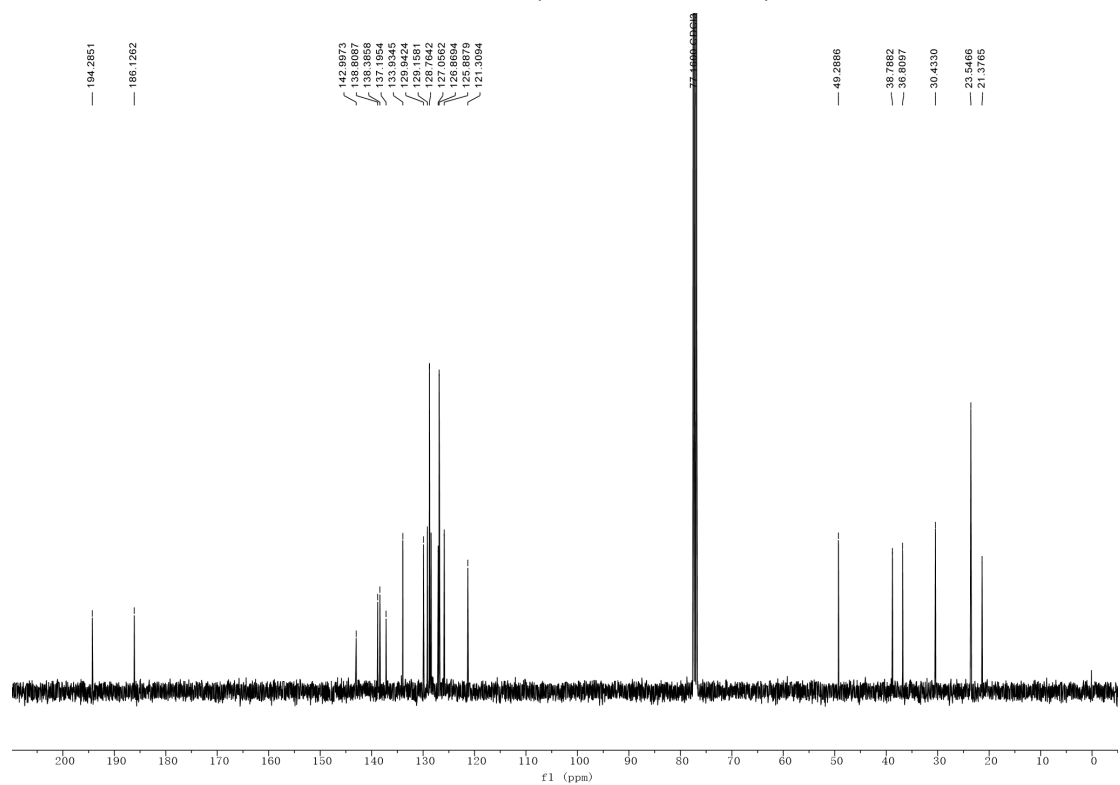



# <sup>1</sup>H NMR-3d (400 MHz, CDCl<sub>3</sub>)

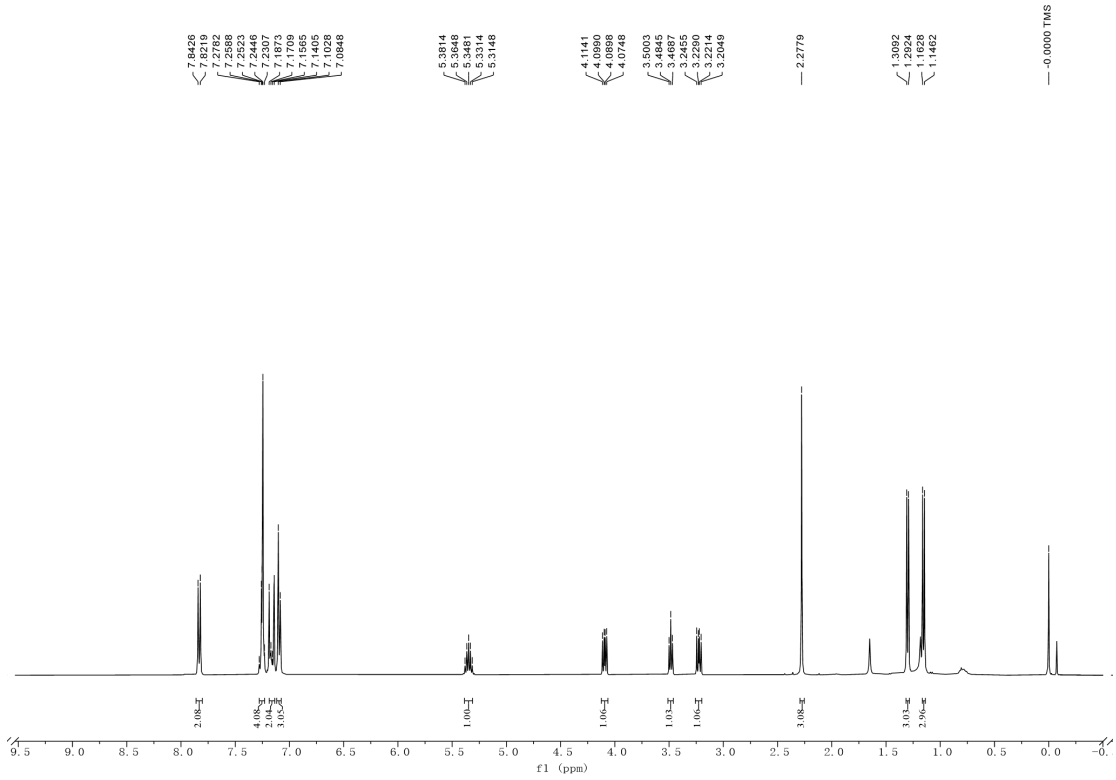

# <sup>13</sup>C NMR-3d (101 MHz, CDCl<sub>3</sub>)

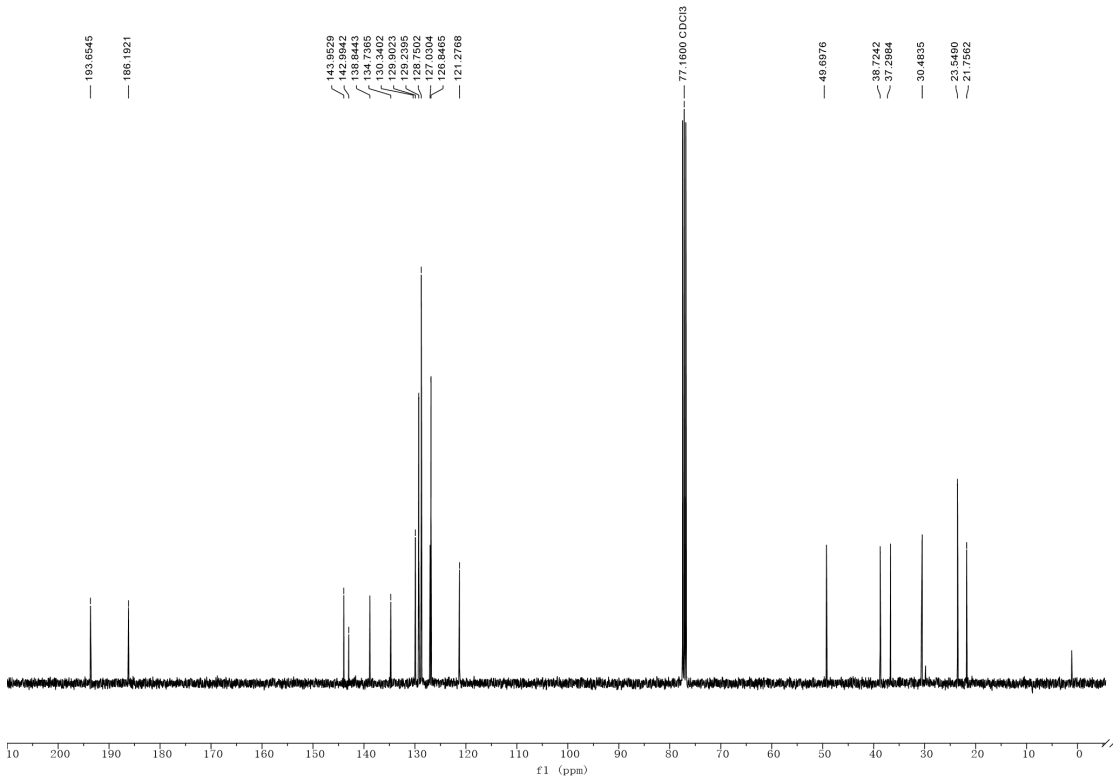

### <sup>1</sup>H NMR-3e (400 MHz, CDCl<sub>3</sub>)

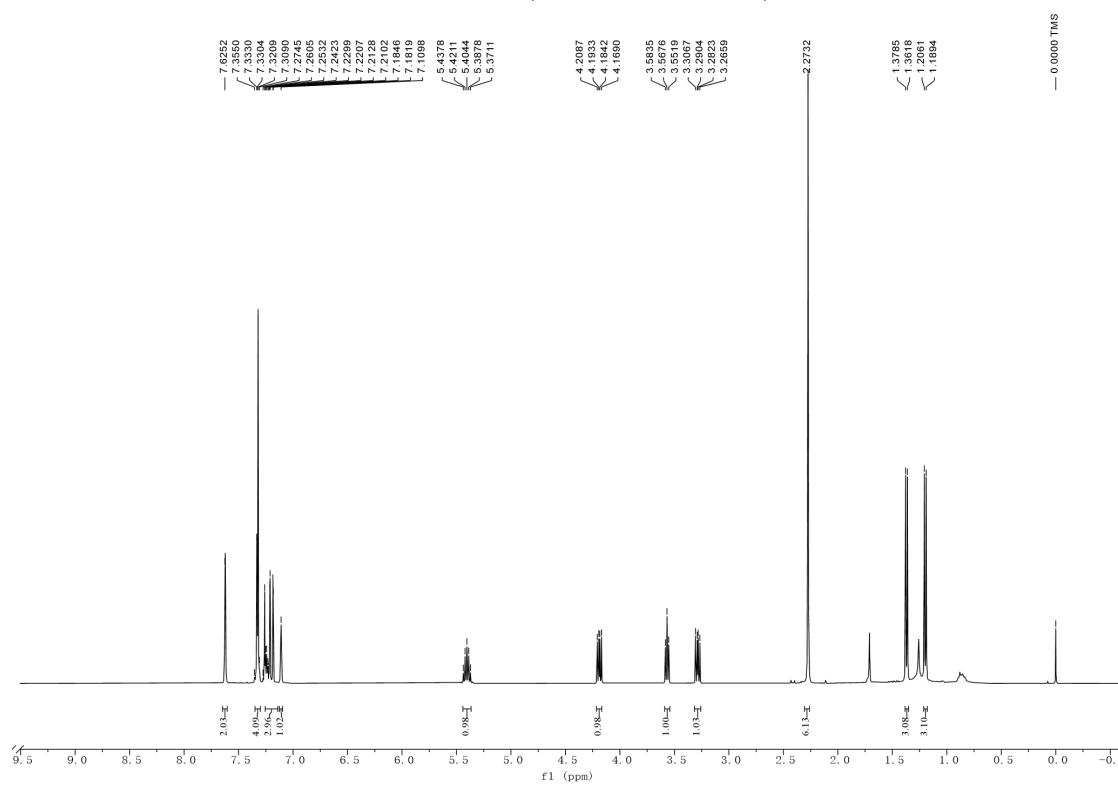

### <sup>13</sup>C NMR-3e (101MHz, CDCl<sub>3</sub>)

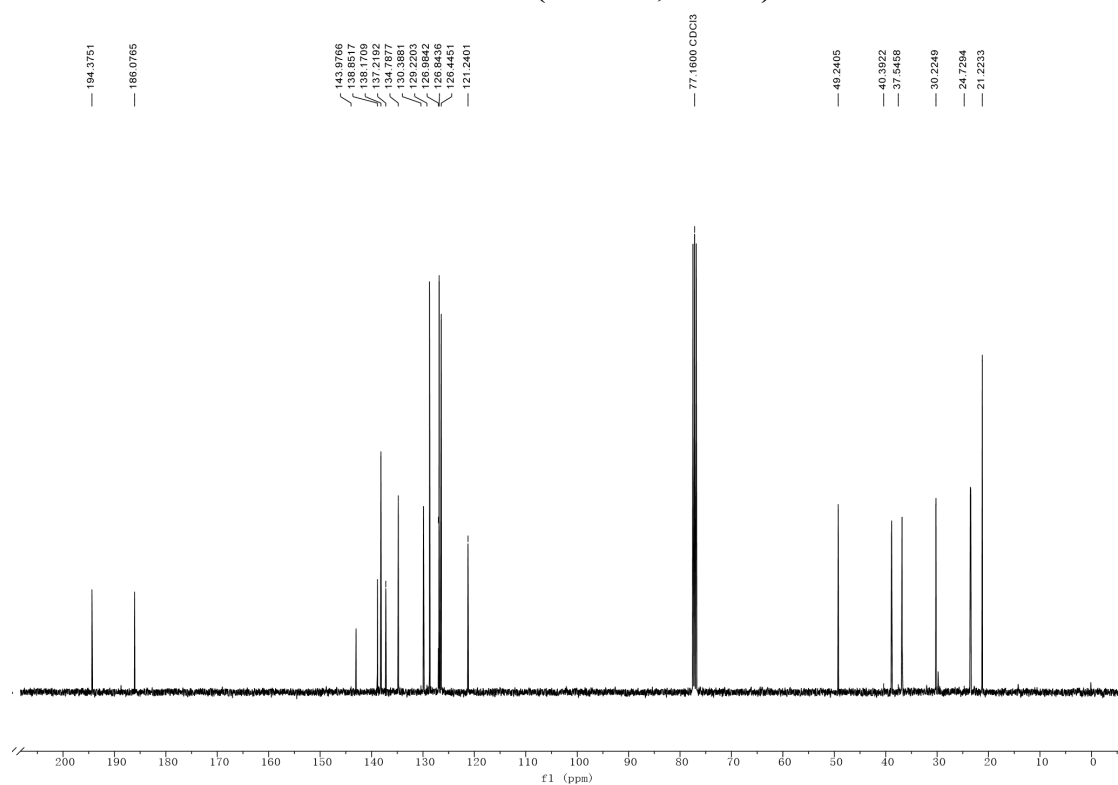

# <sup>1</sup>H NMR-3f (400 MHz, CDCl<sub>3</sub>)

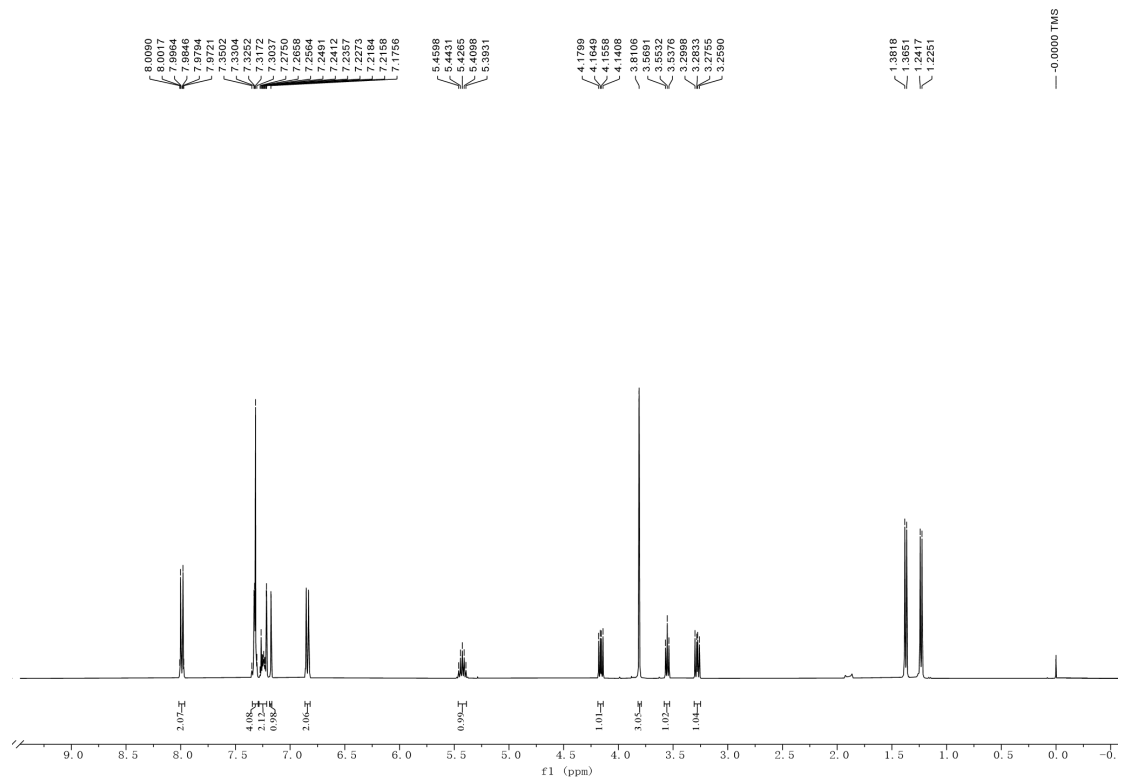

# <sup>13</sup>C NMR-3f (101 MHz, CDCl<sub>3</sub>)

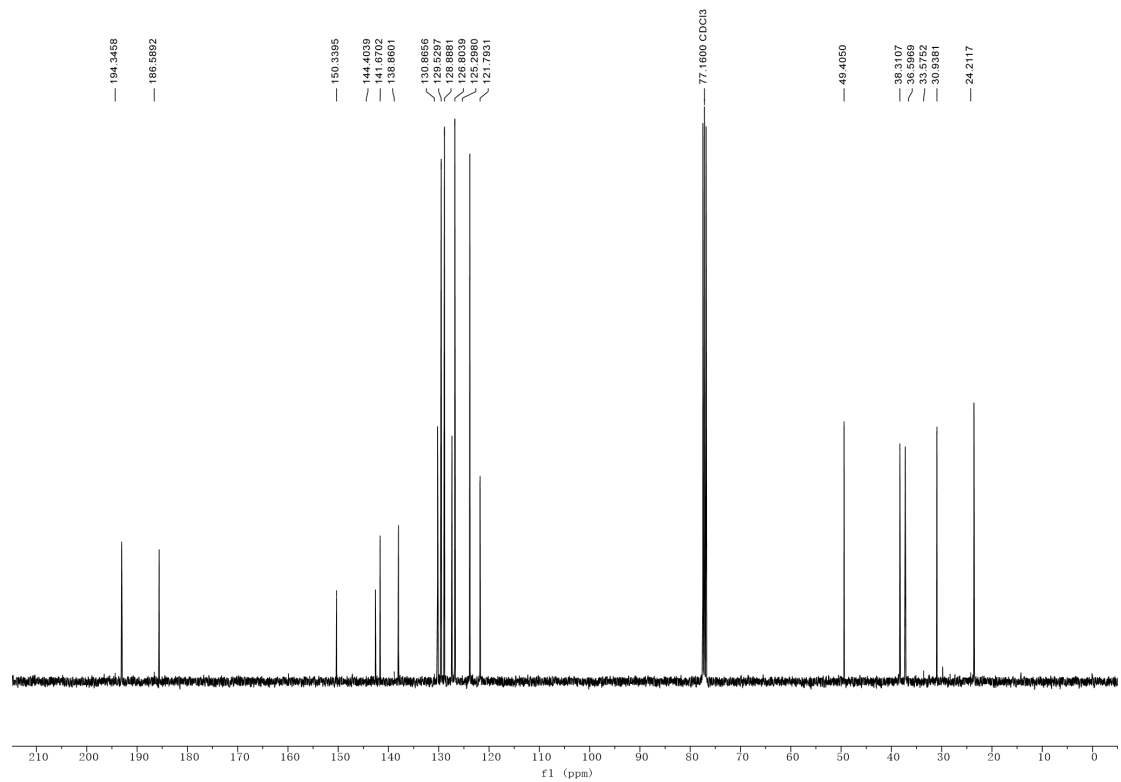

# <sup>1</sup>H NMR-3g (400 MHz, CDCl<sub>3</sub>)

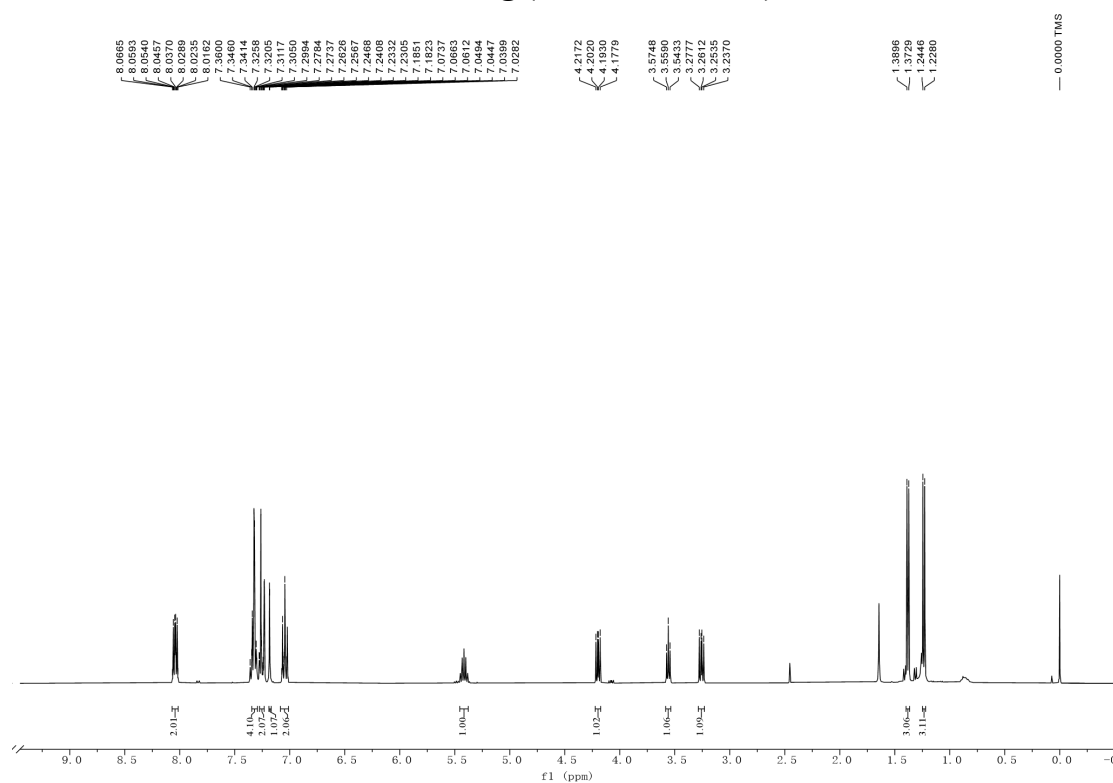

# <sup>13</sup>C NMR-3g (101 MHz, CDCl<sub>3</sub>)

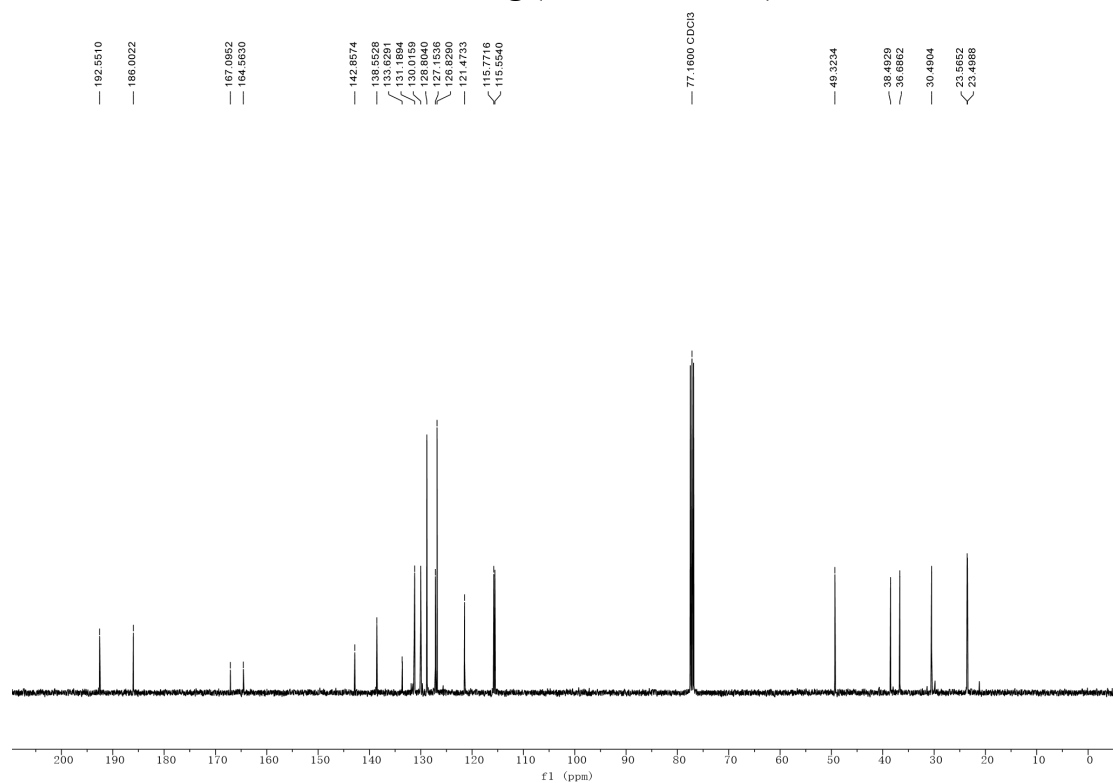

**$^{19}\text{F}$  NMR-3g (376 MHz,  $\text{CDCl}_3$ )**

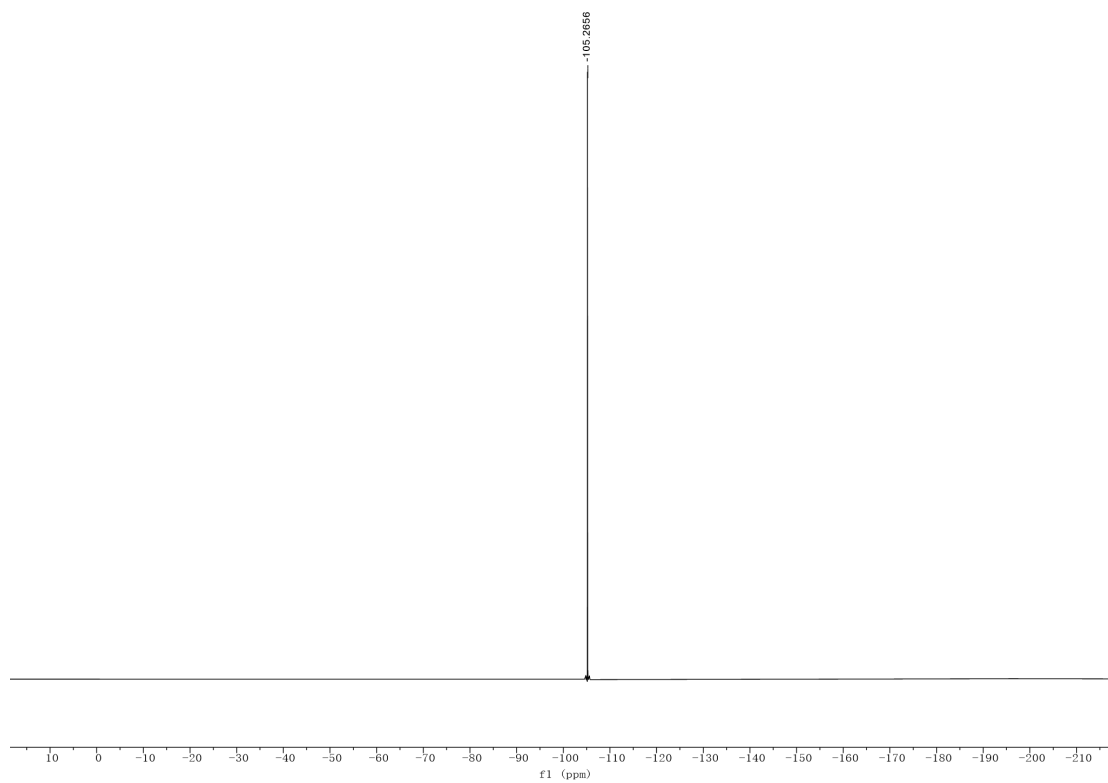

**<sup>1</sup>H NMR-3h (400 MHz, CDCl<sub>3</sub>)**

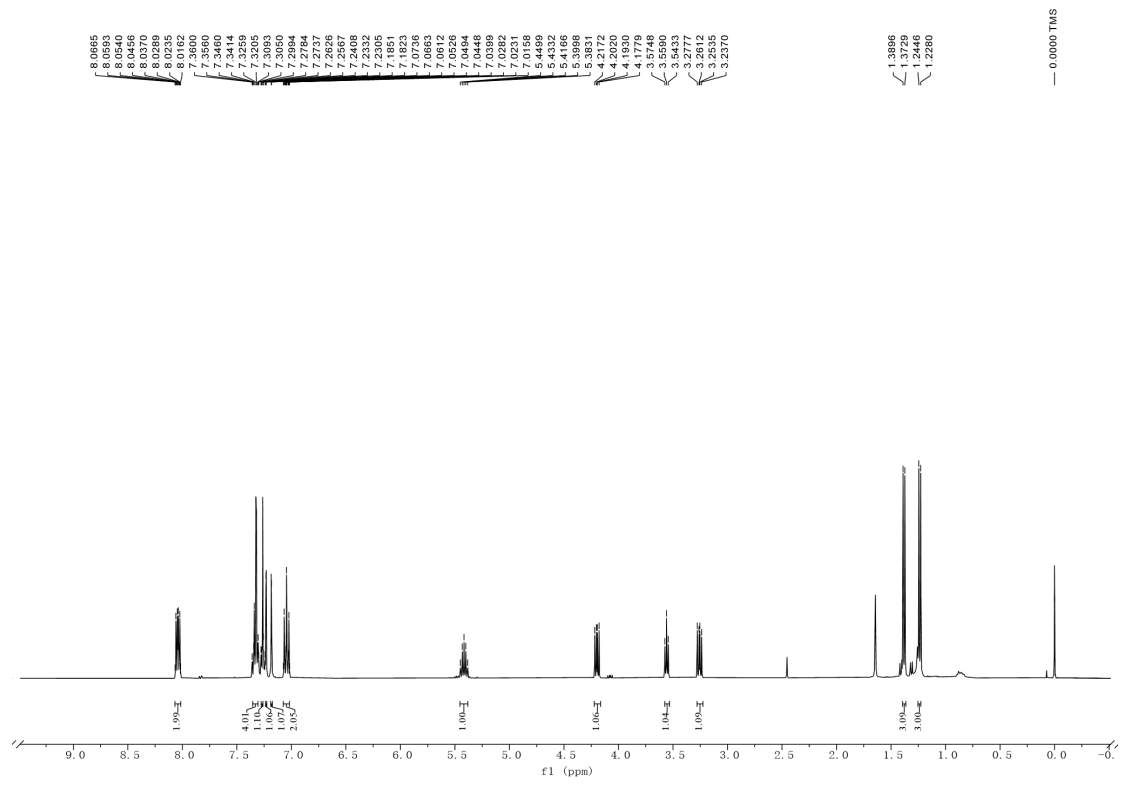

**<sup>13</sup>C NMR-3h (101 MHz, CDCl<sub>3</sub>)**

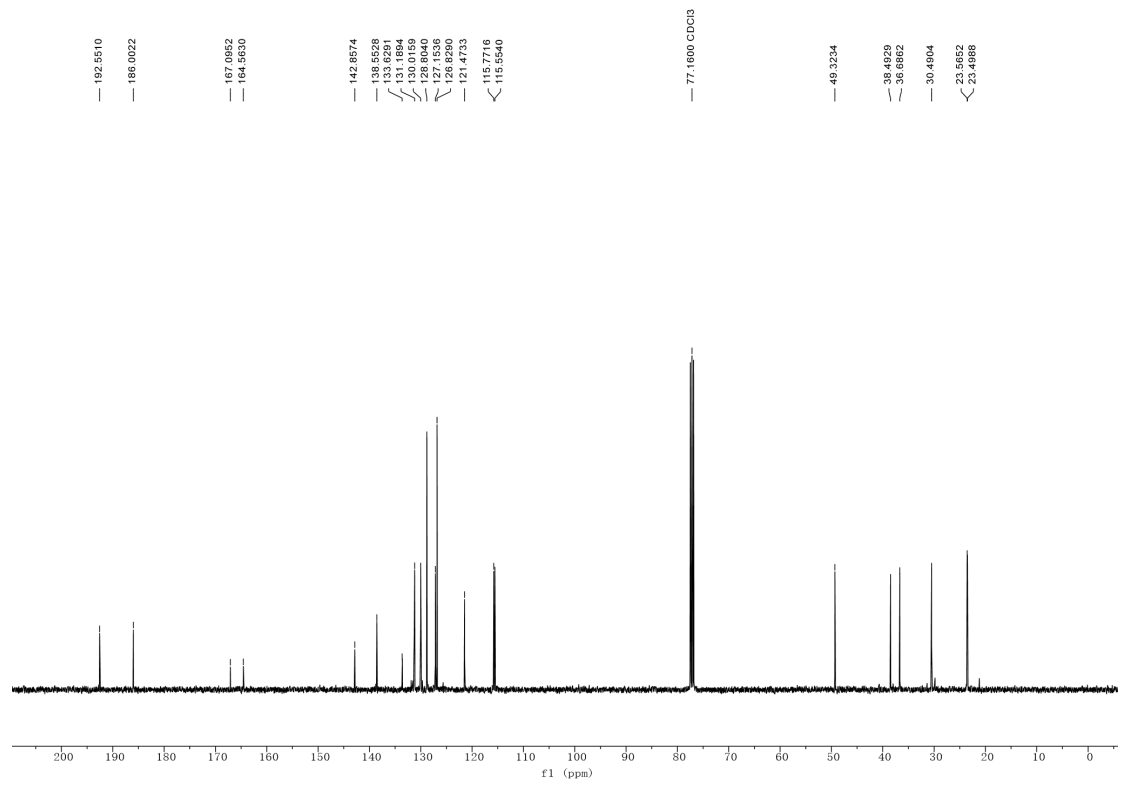

**$^{19}\text{F}$  NMR-3h (376 MHz,  $\text{CDCl}_3$ )**

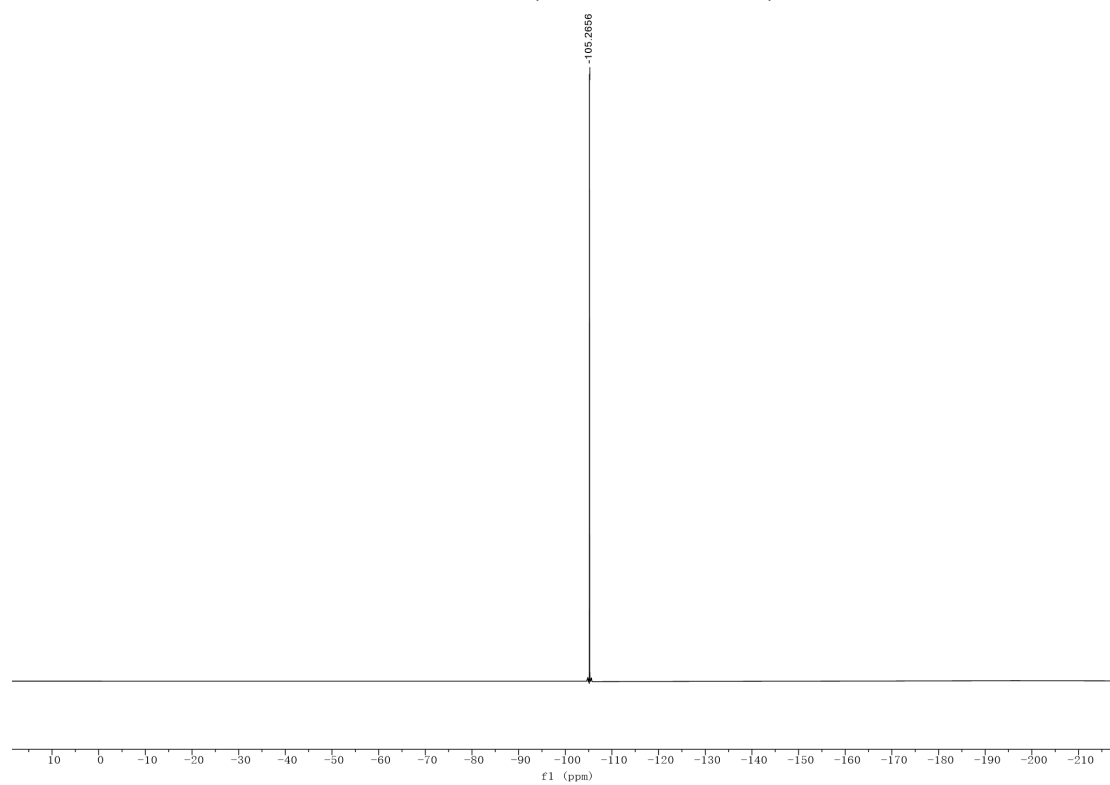

# <sup>1</sup>H NMR-3i (400 MHz, CDCl<sub>3</sub>)

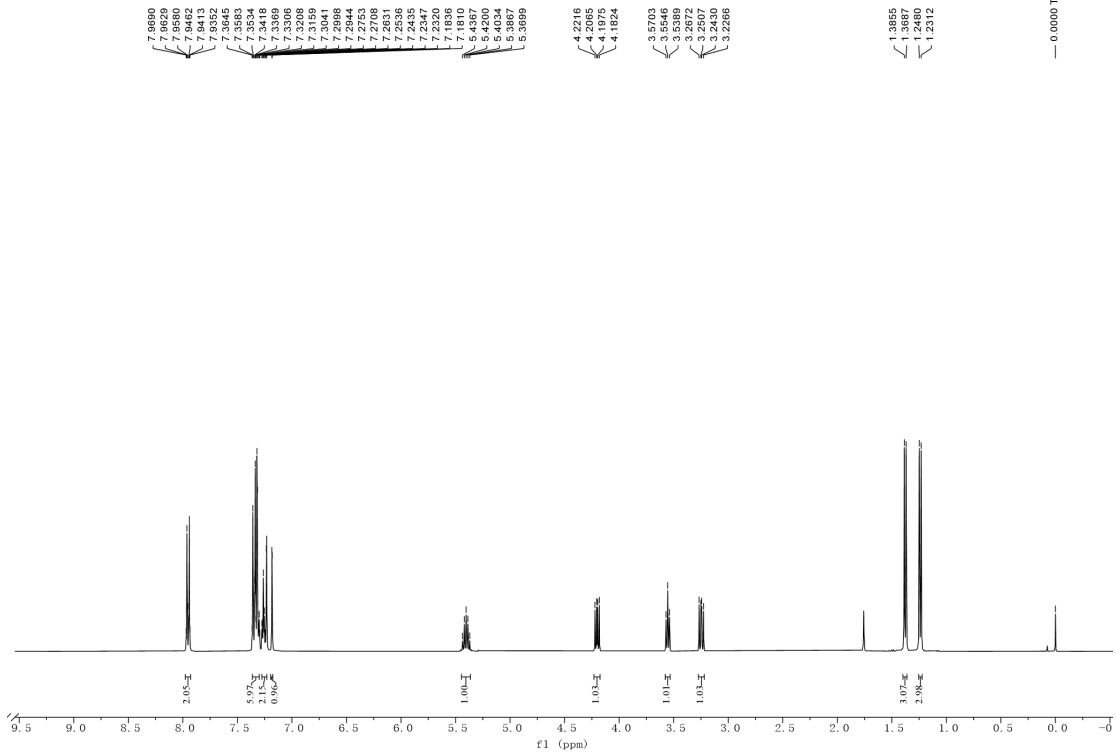

# <sup>13</sup>C NMR-3i (101 MHz, CDCl<sub>3</sub>)

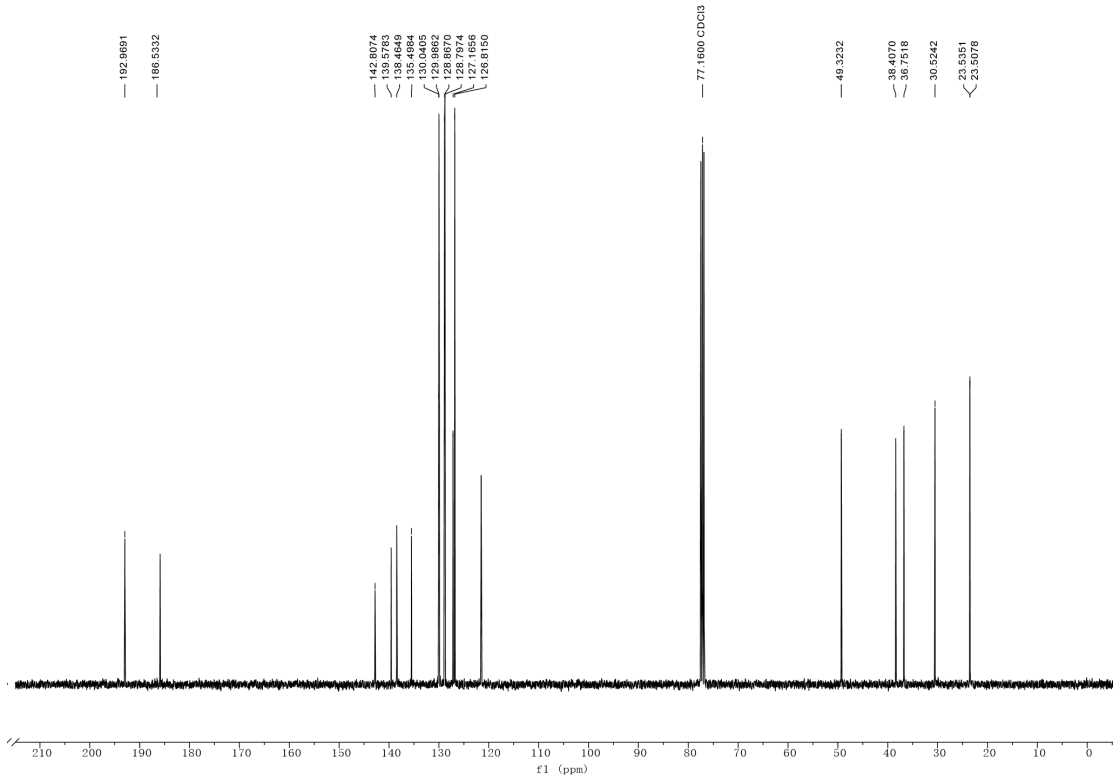



### <sup>1</sup>H NMR-3j (400 MHz, CDCl<sub>3</sub>)

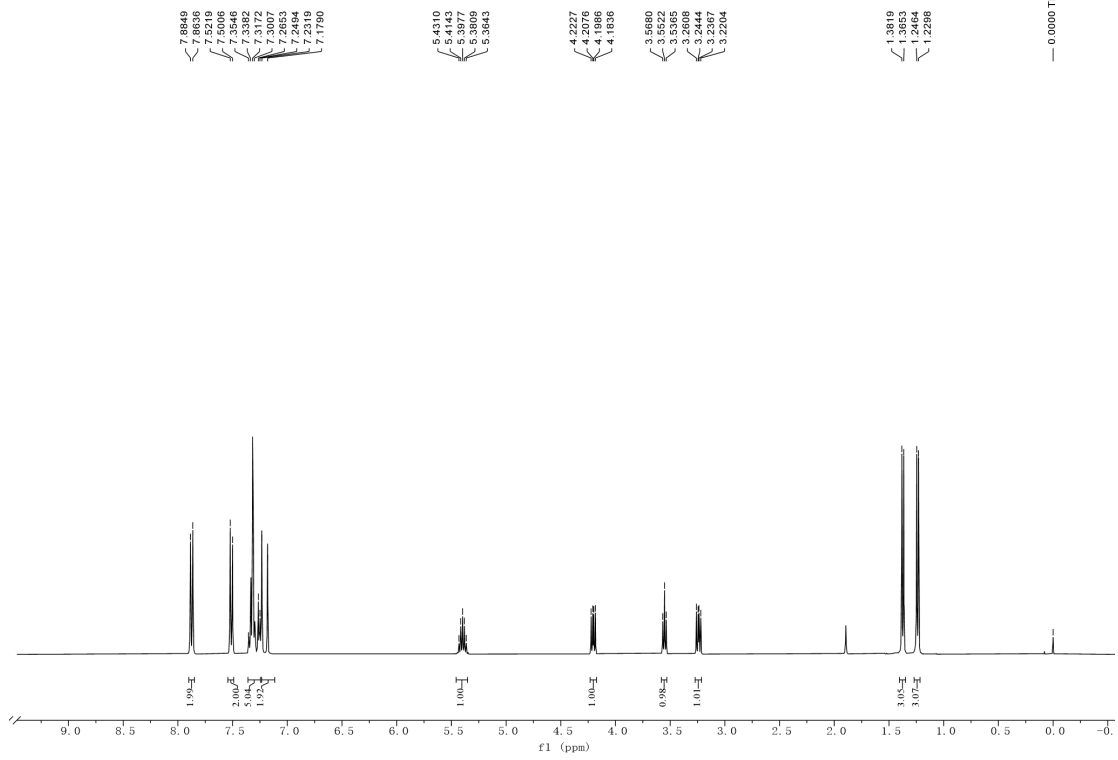

### <sup>13</sup>C NMR-3j (101 MHz, CDCl<sub>3</sub>)

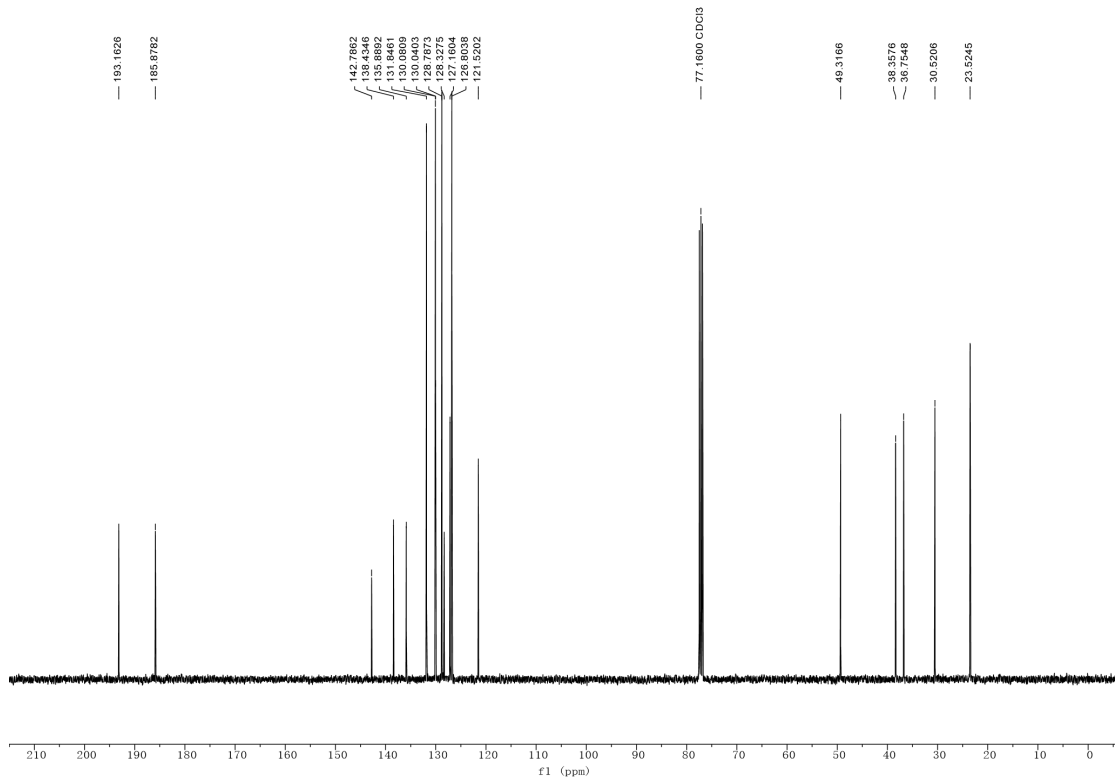

# <sup>1</sup>H NMR-3k (400 MHz, CDCl<sub>3</sub>)

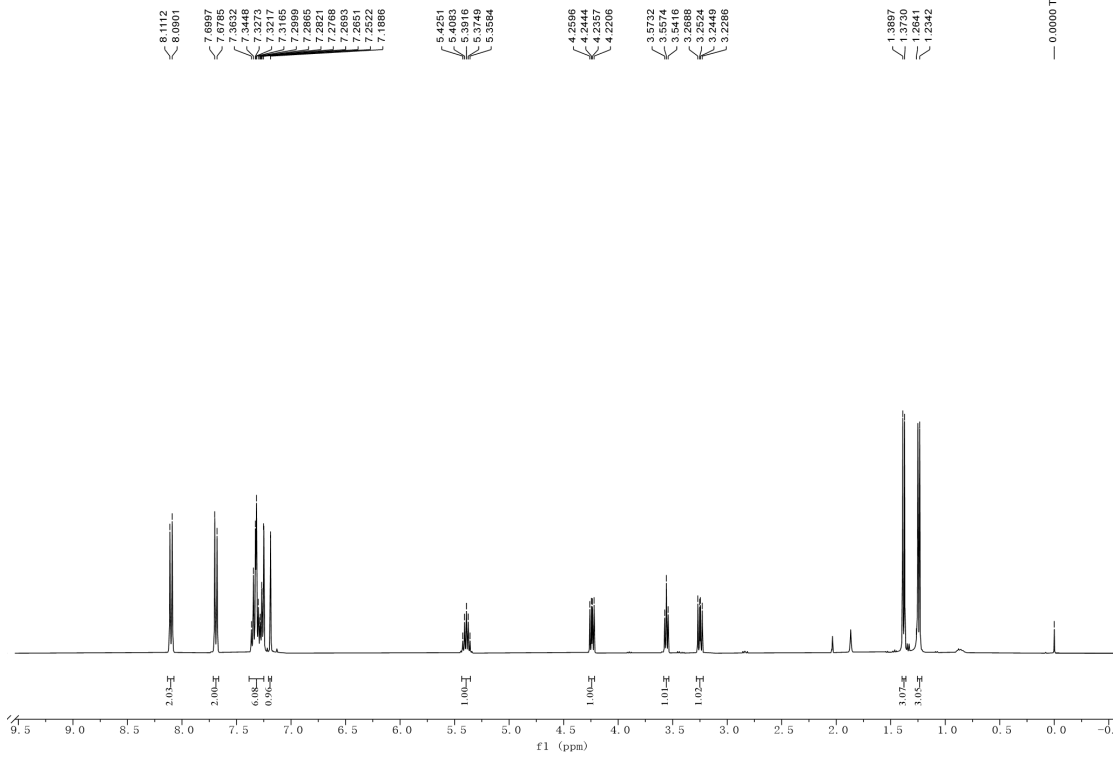

# <sup>13</sup>C NMR-3k (101 MHz, CDCl<sub>3</sub>)

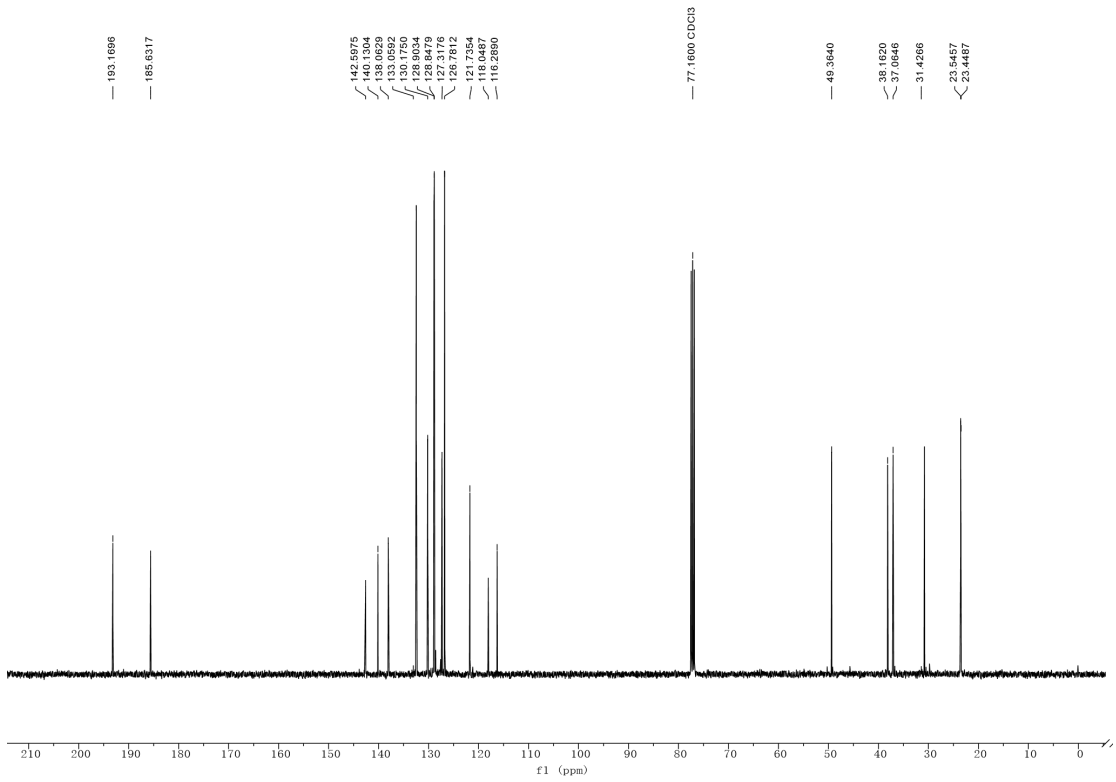

# <sup>1</sup>H NMR-31 (400 MHz, CDCl<sub>3</sub>)

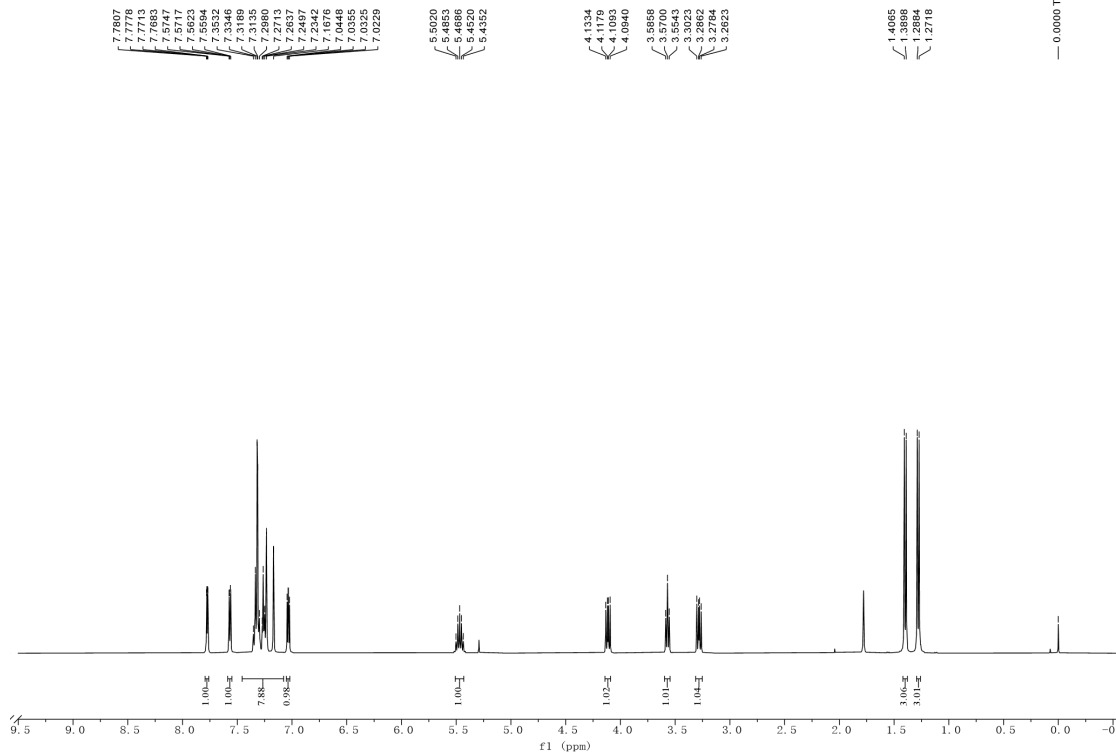

# <sup>13</sup>C NMR-31 (101 MHz, CDCl<sub>3</sub>)

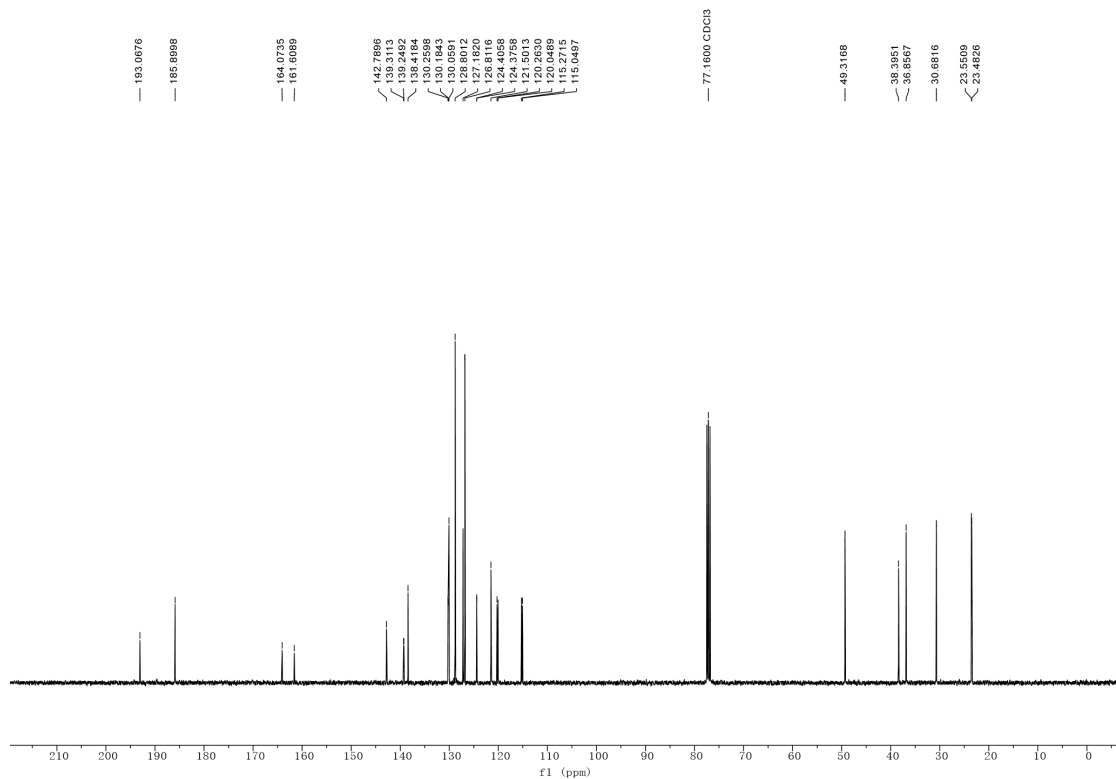

# <sup>1</sup>H NMR-3m (400 MHz, CDCl<sub>3</sub>)

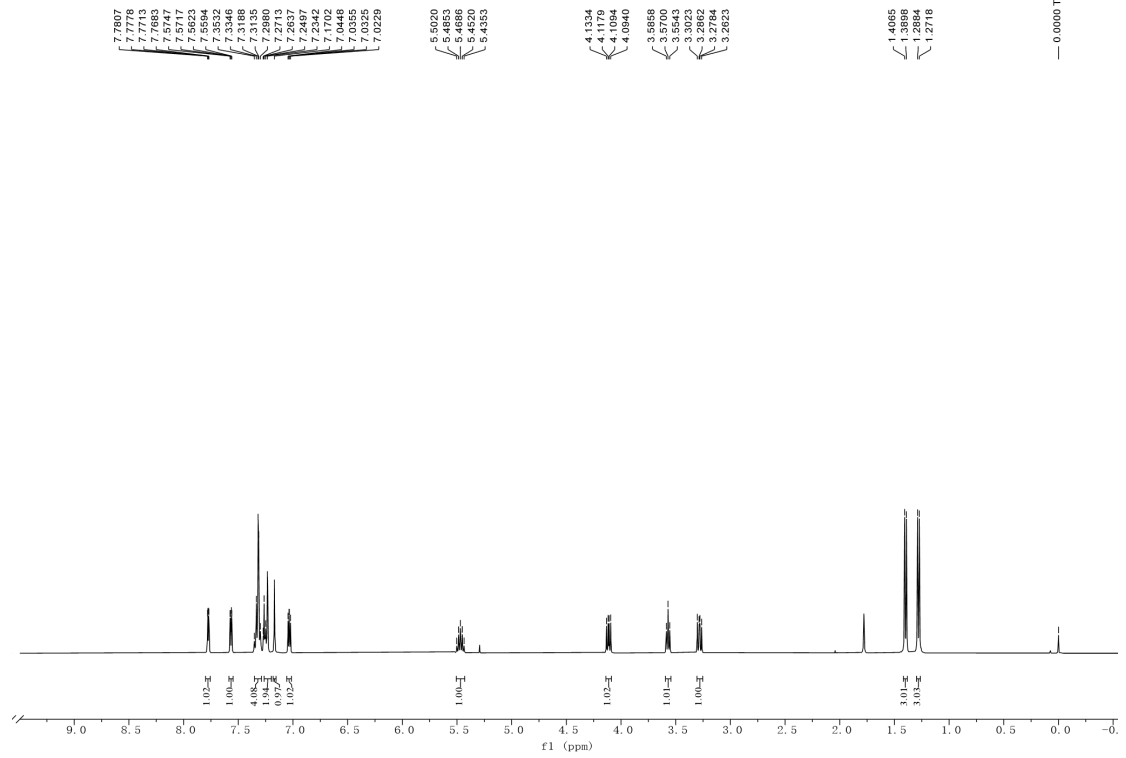

# <sup>13</sup>C NMR-3m (101 MHz, CDCl<sub>3</sub>)

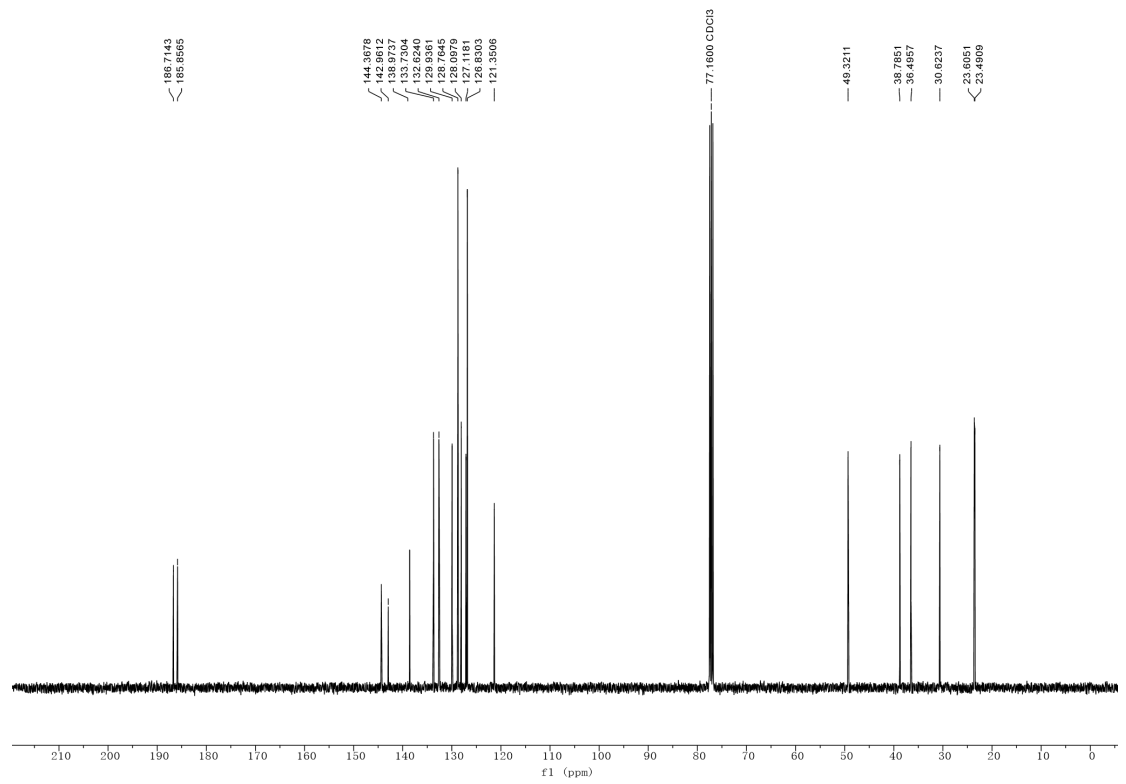

# <sup>1</sup>H NMR-3n (400 MHz, CDCl<sub>3</sub>)

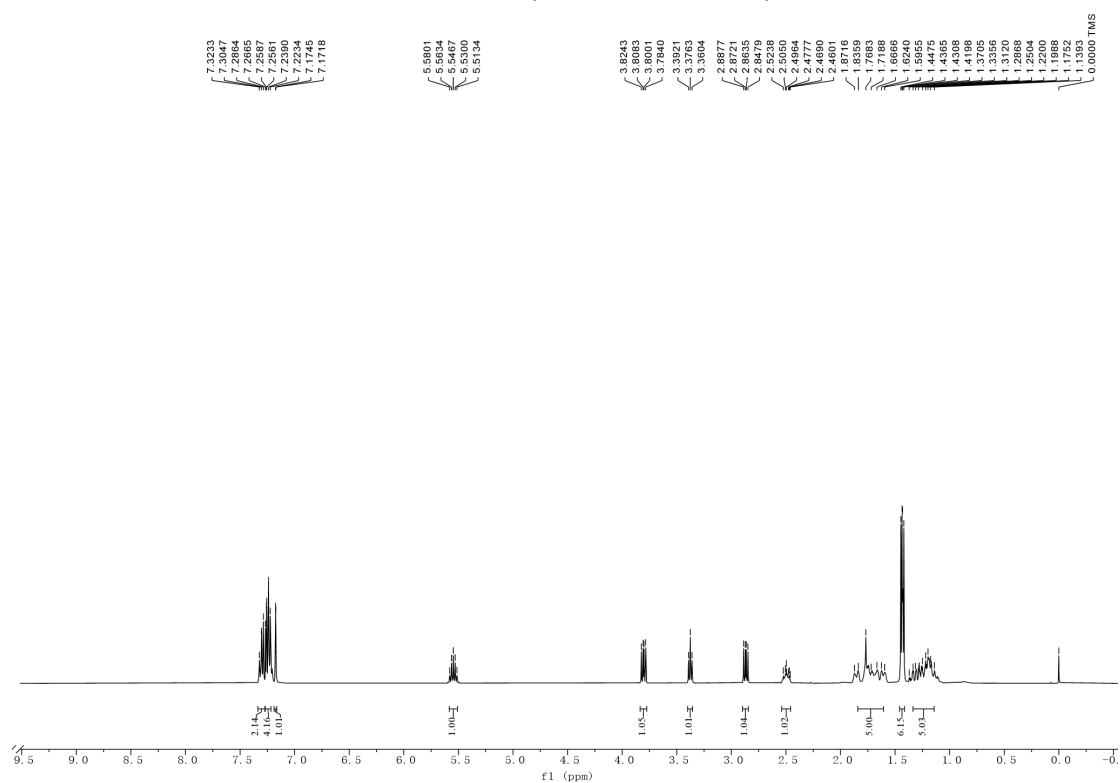

# <sup>13</sup>C NMR-3n (101 MHz, CDCl<sub>3</sub>)

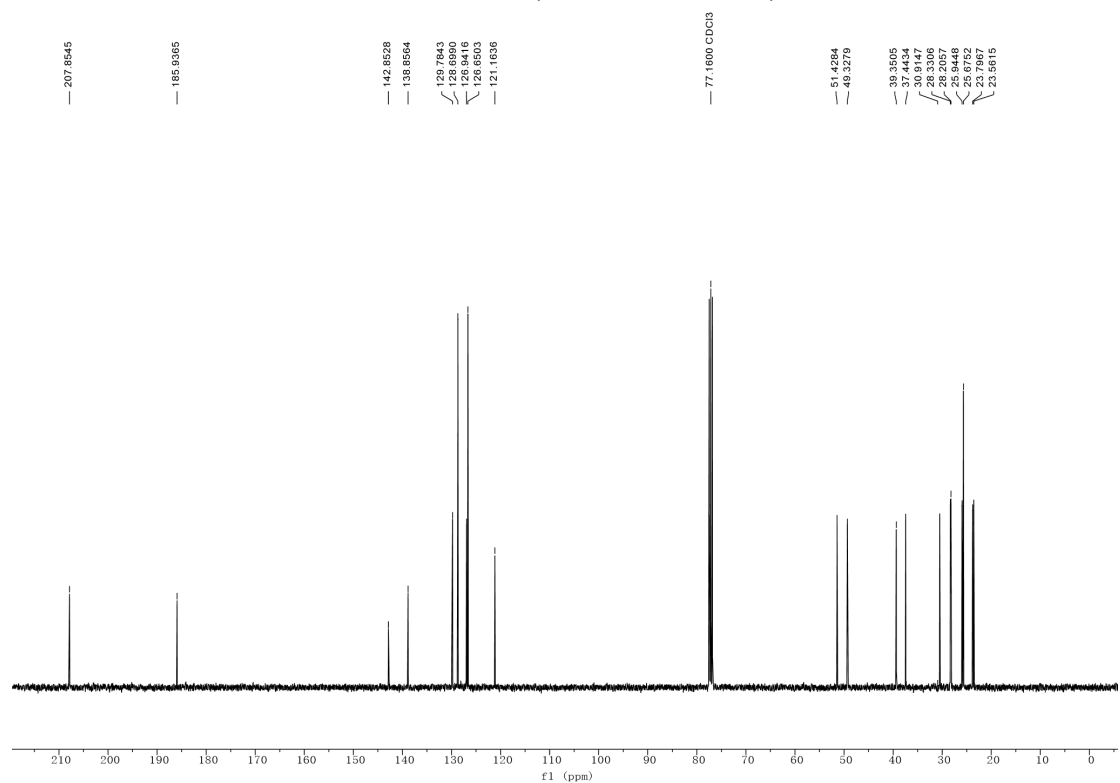

# <sup>1</sup>H NMR-4a (400 MHz, CDCl<sub>3</sub>)

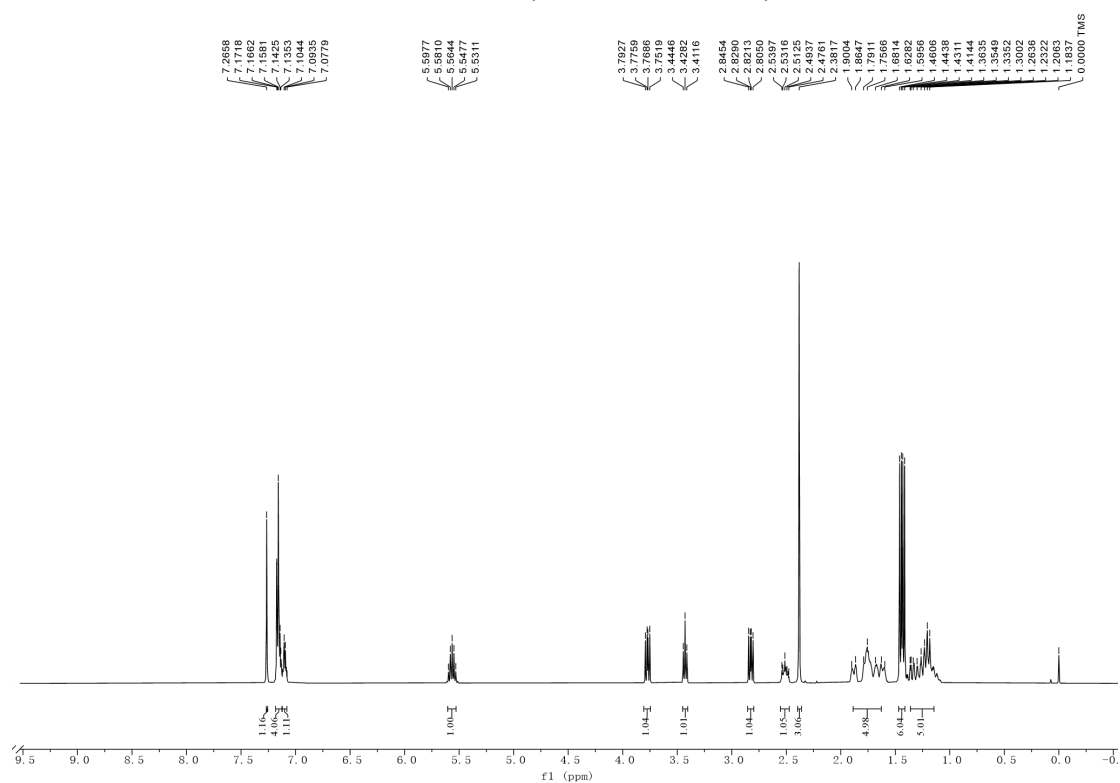

# <sup>13</sup>C NMR-4a (101 MHz, CDCl<sub>3</sub>)

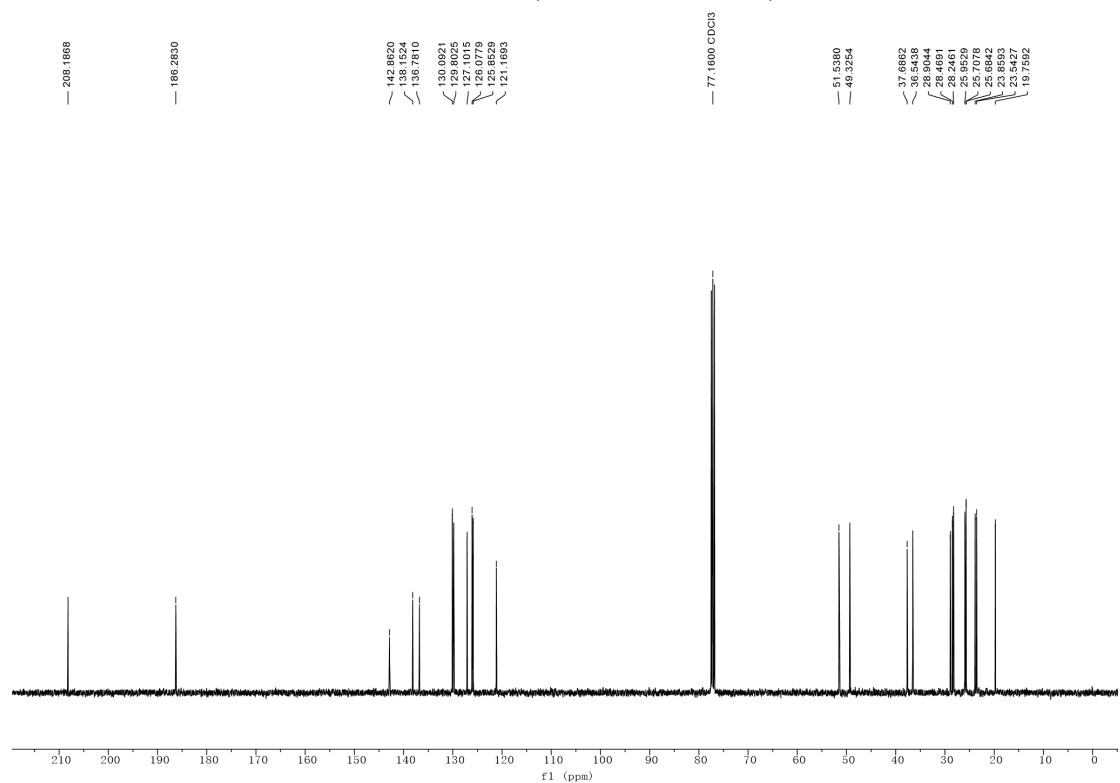

# <sup>1</sup>H NMR-4b (400 MHz, CDCl<sub>3</sub>)

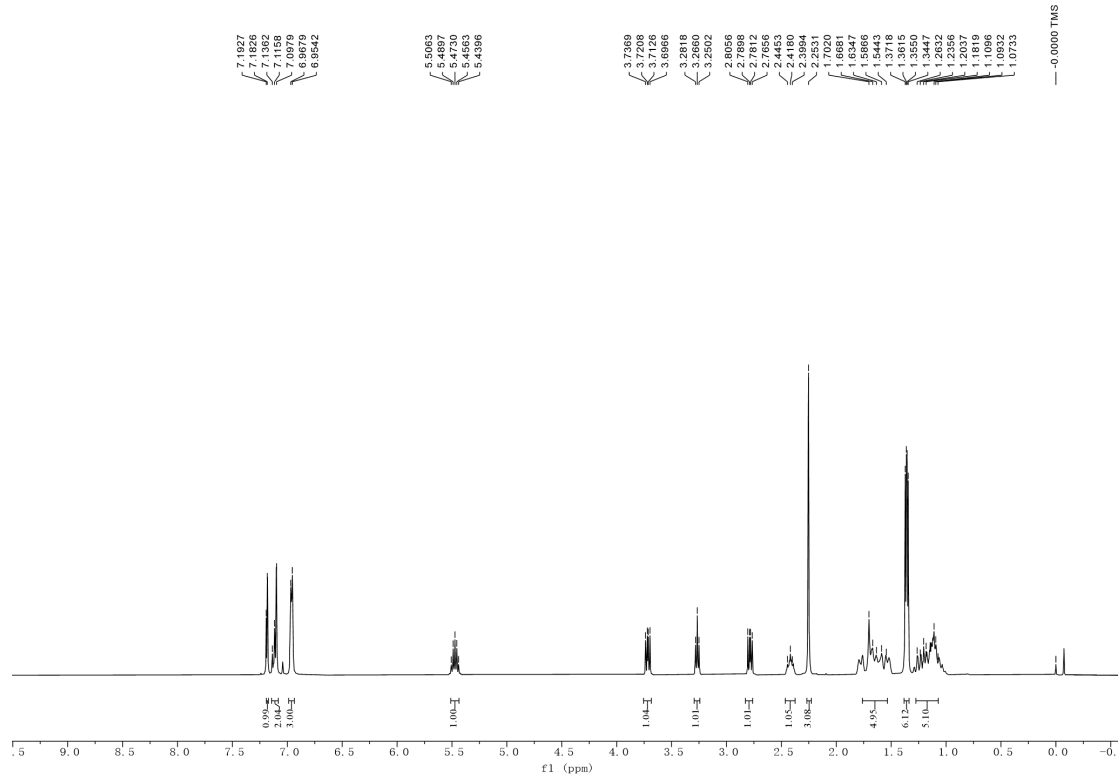

# <sup>13</sup>C NMR-4b (101 MHz, CDCl<sub>3</sub>)

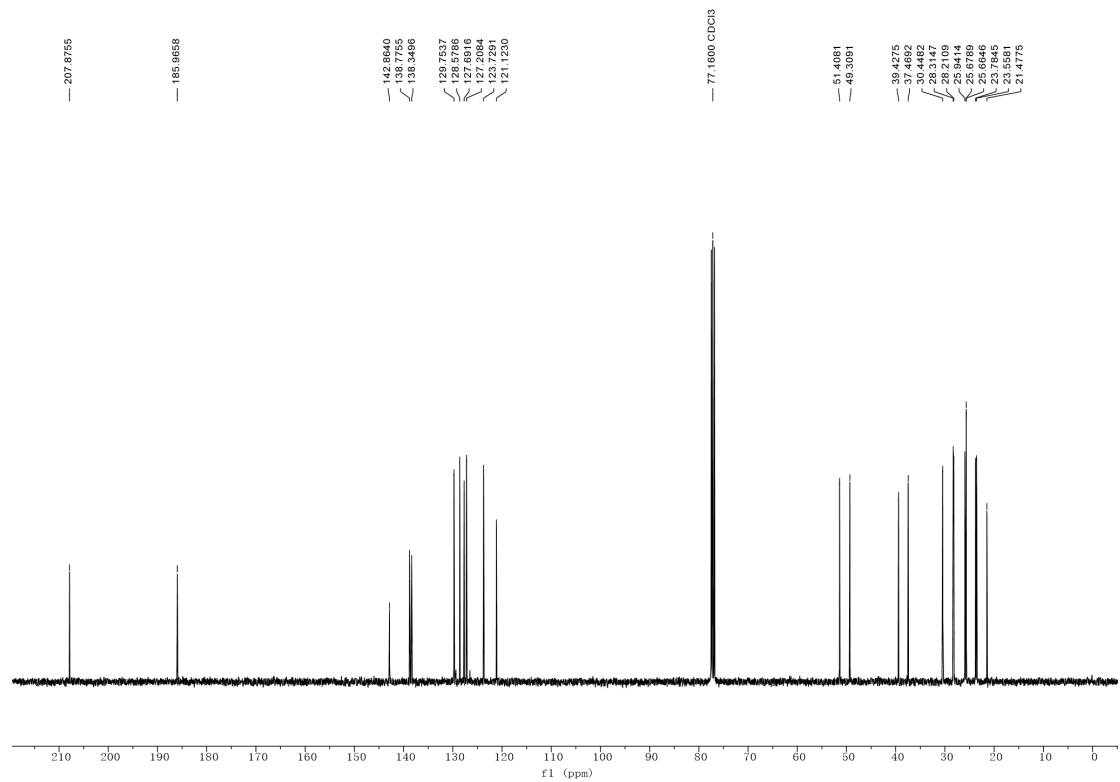

### <sup>1</sup>H NMR-4c (400 MHz, CDCl<sub>3</sub>)

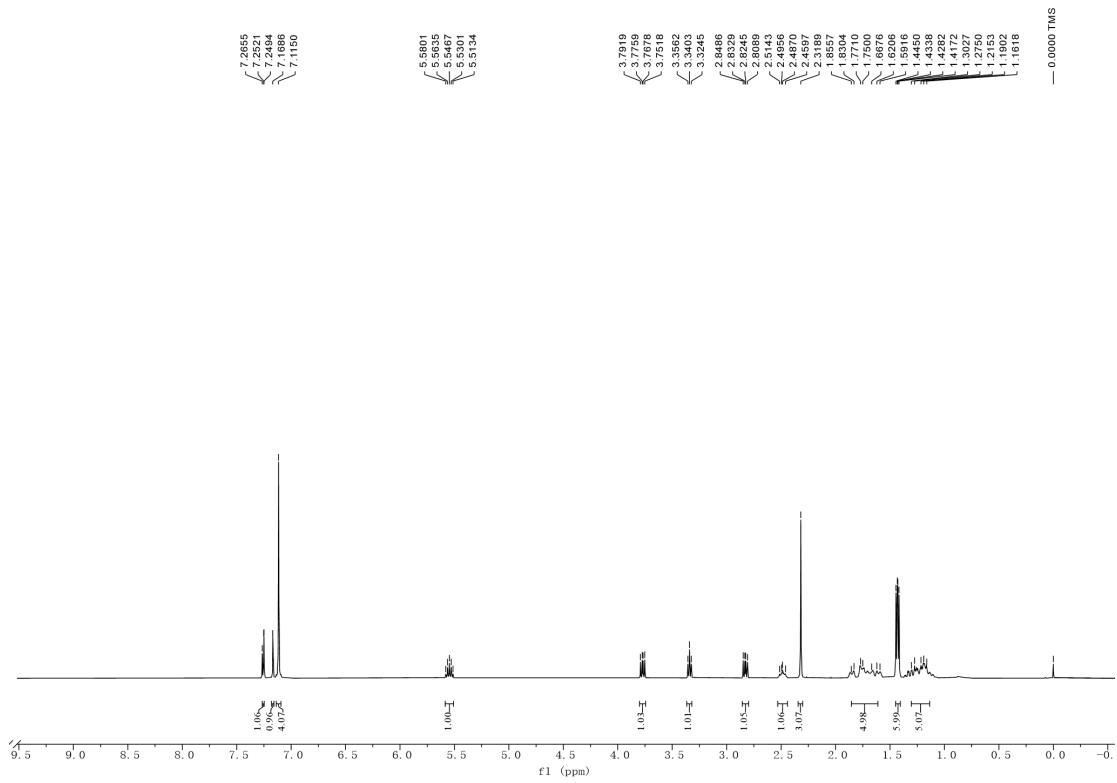

### <sup>13</sup>C NMR-4c (101 MHz, CDCl<sub>3</sub>)

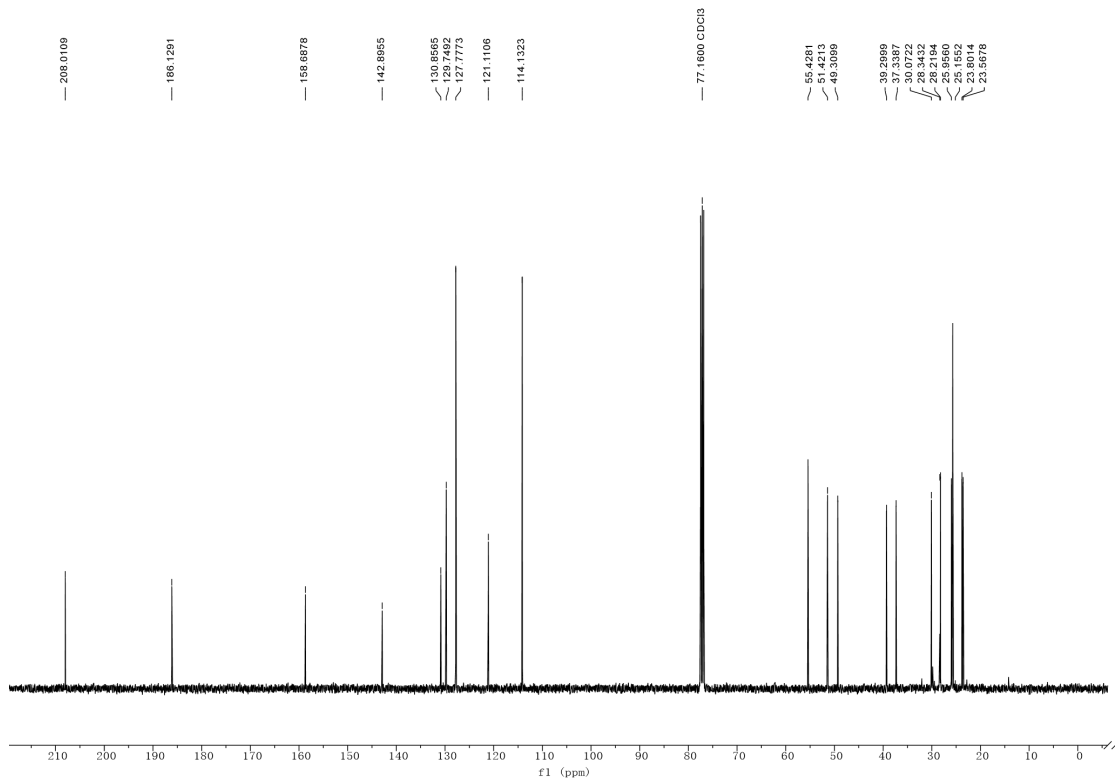



**<sup>1</sup>H NMR-4d (400 MHz, CDCl<sub>3</sub>)**

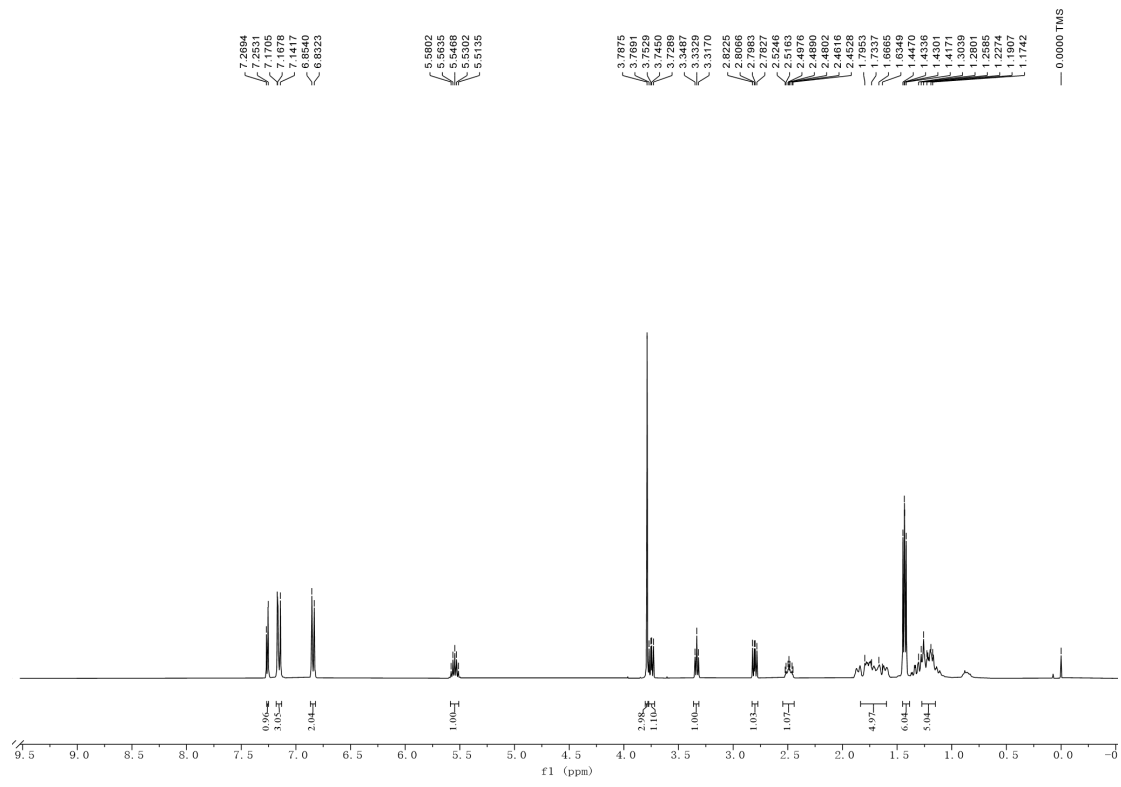

**<sup>13</sup>C NMR-4d (101 MHz, CDCl<sub>3</sub>)**

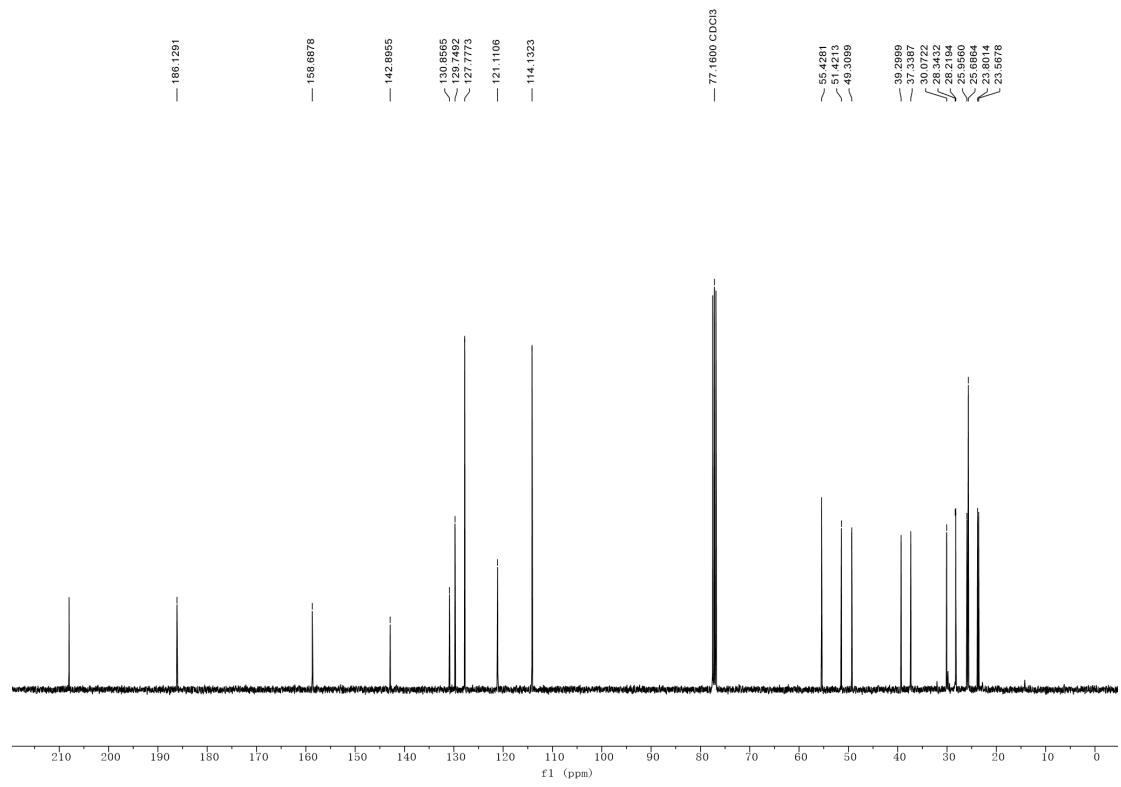

# <sup>1</sup>H NMR-4e (400 MHz, CDCl<sub>3</sub>)

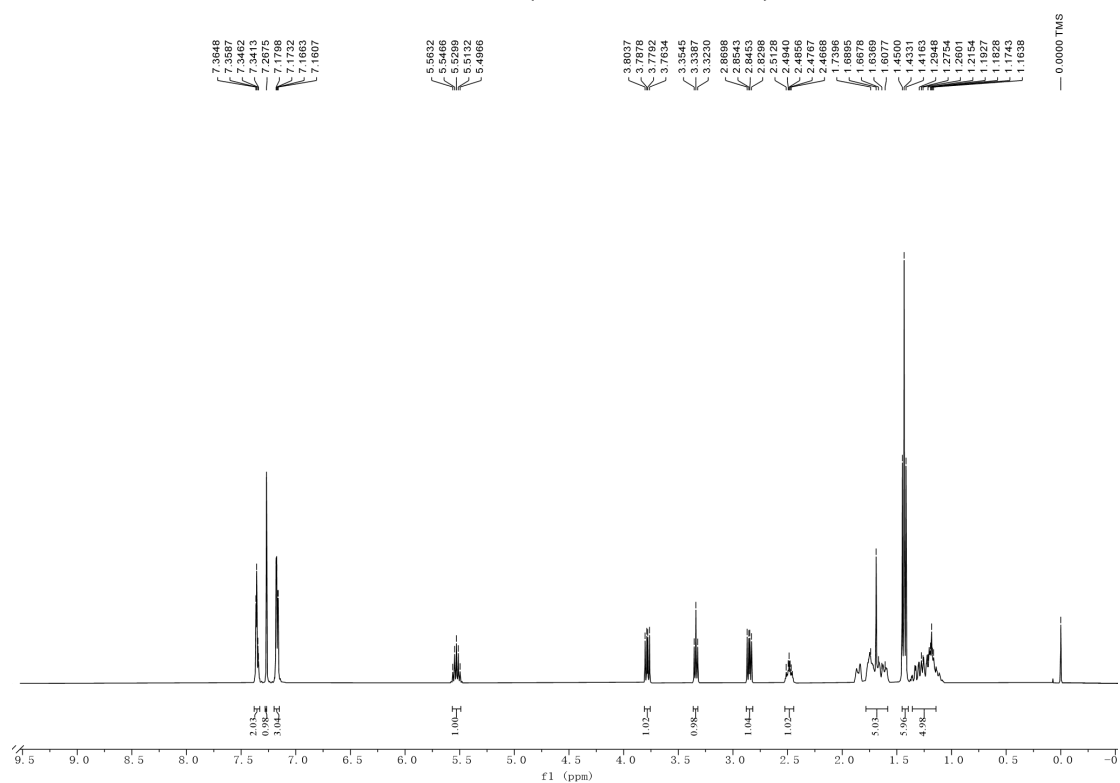

# <sup>13</sup>C NMR-4e (101 MHz, CDCl<sub>3</sub>)

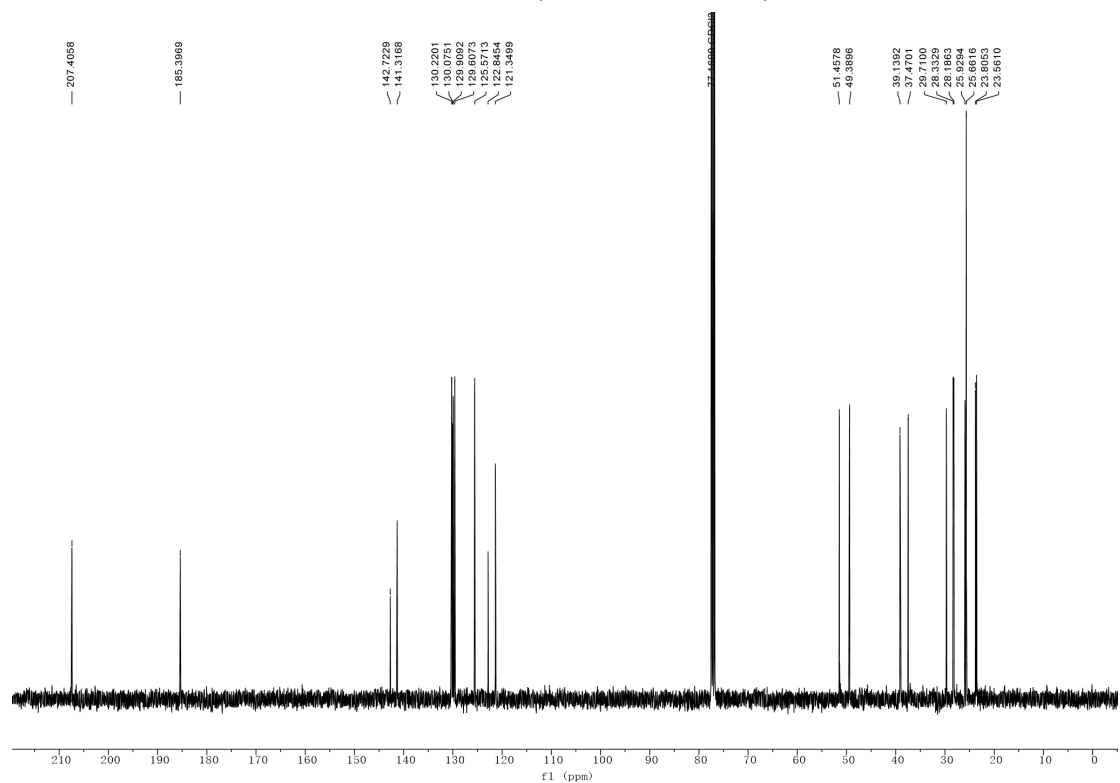

**$^{19}\text{F}$  NMR-4e (376 MHz,  $\text{CDCl}_3$ )**

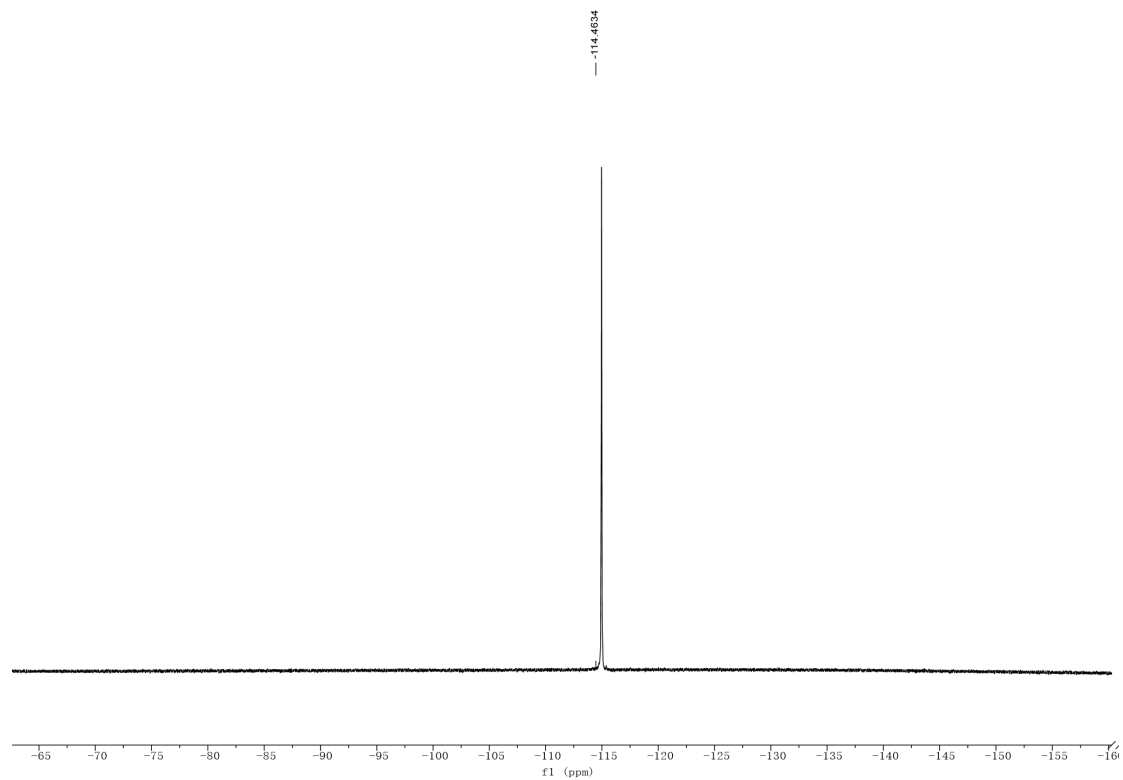

# <sup>1</sup>H NMR-4f (400 MHz, CDCl<sub>3</sub>)

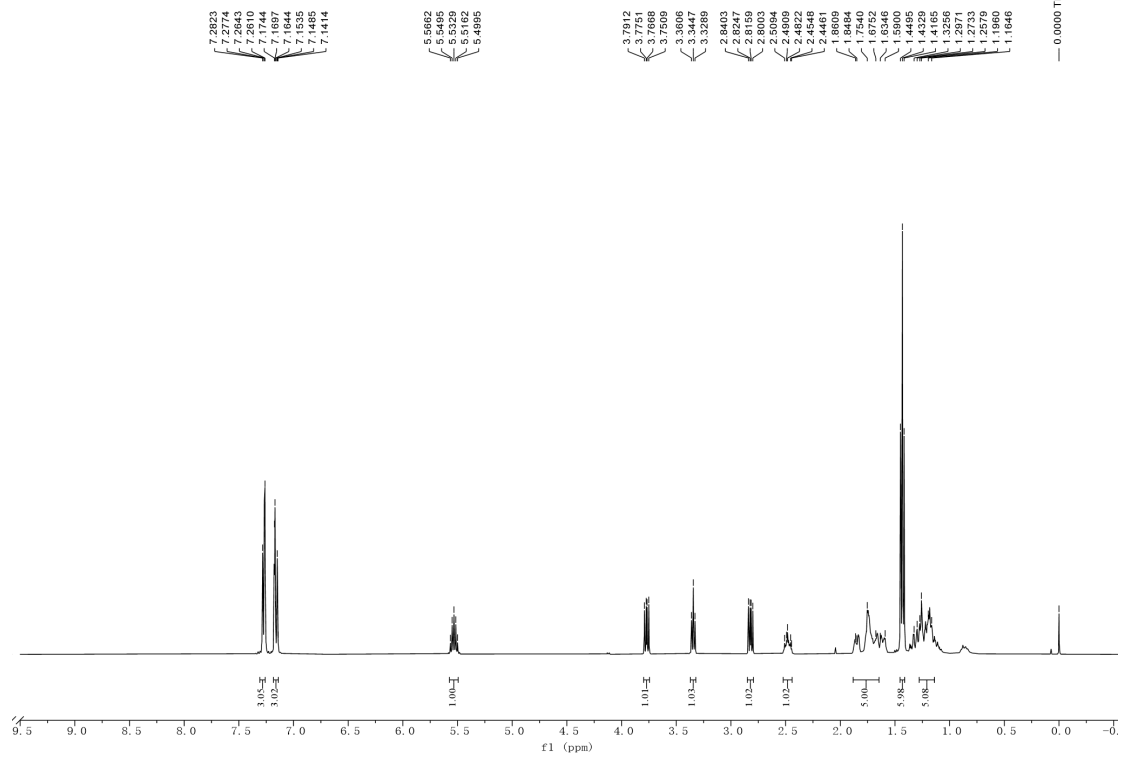

# <sup>13</sup>C NMR-4f (101 MHz, CDCl<sub>3</sub>)

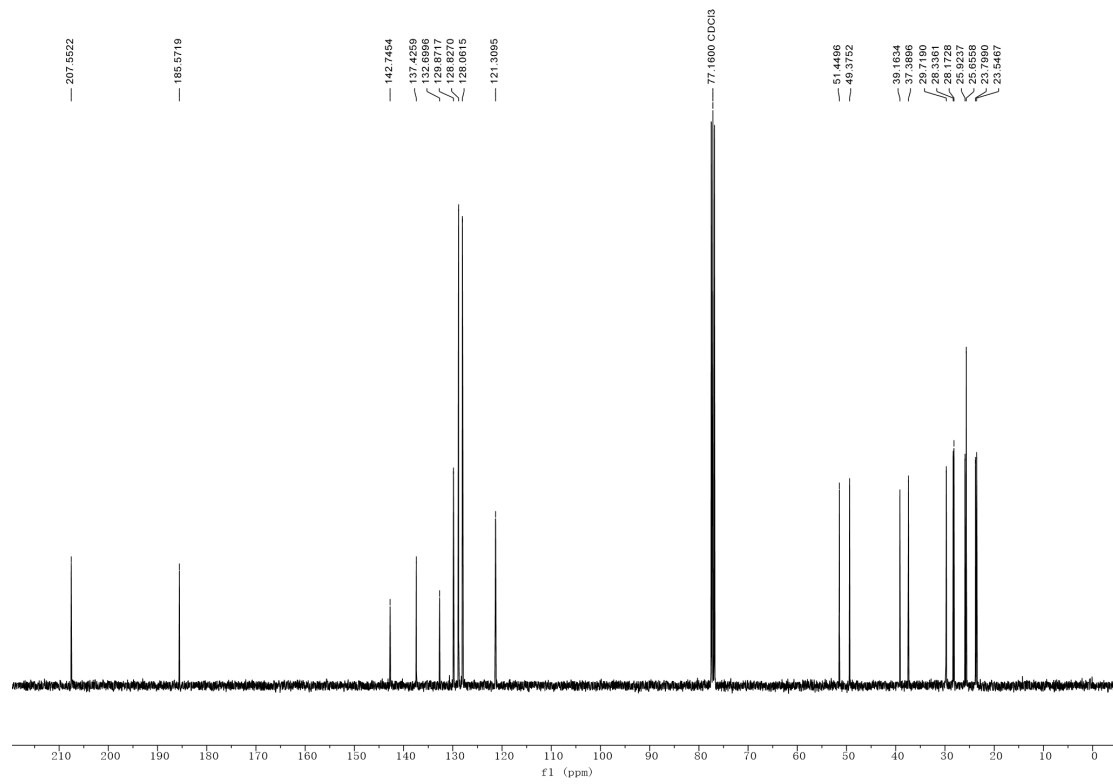

# <sup>1</sup>H NMR-4g (400 MHz, CDCl<sub>3</sub>)

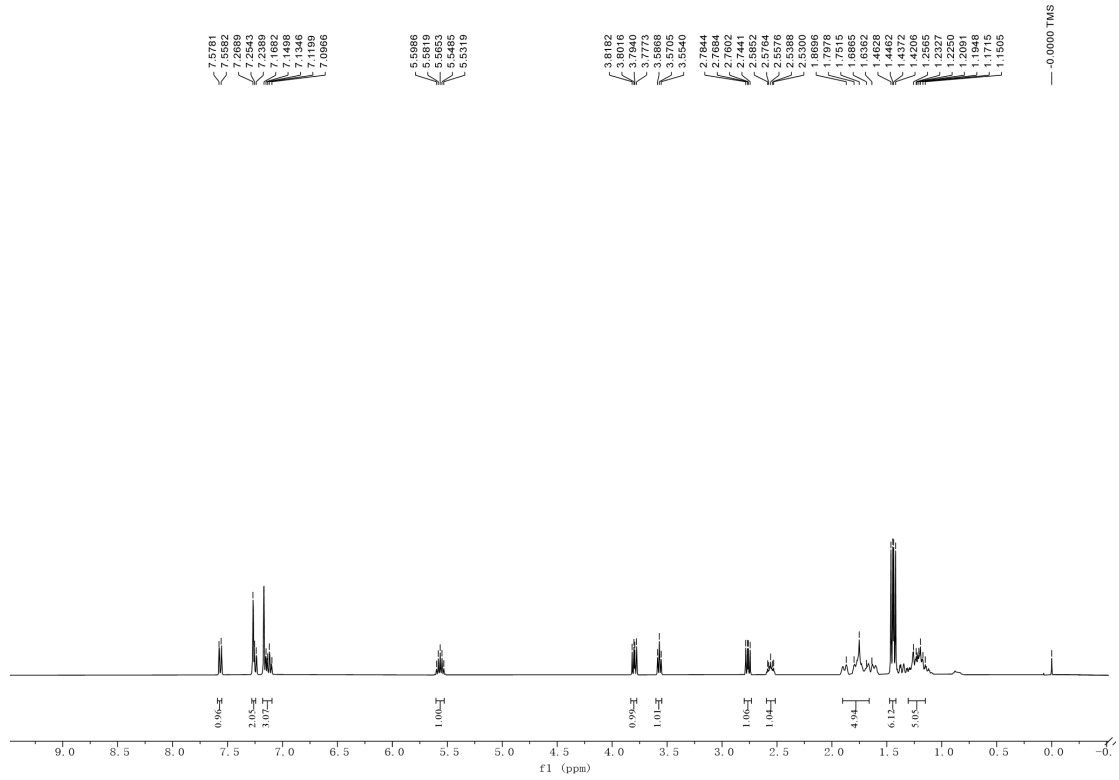

# <sup>13</sup>C NMR-4g (101 MHz, CDCl<sub>3</sub>)

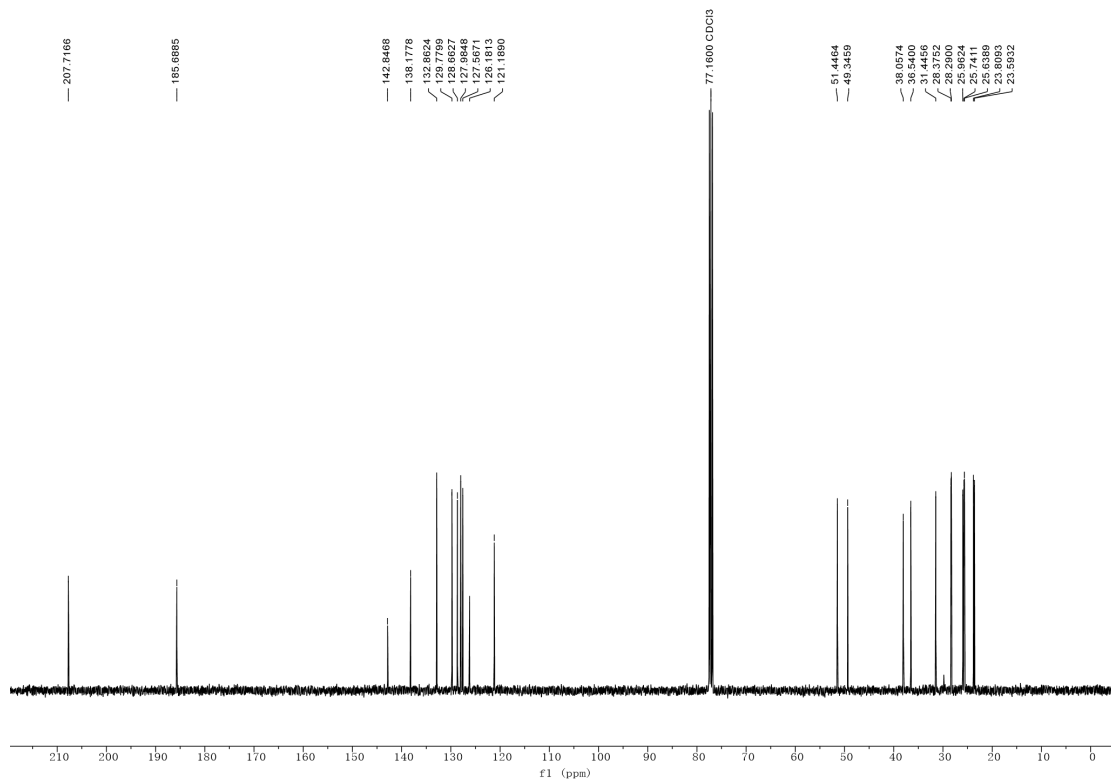

# <sup>1</sup>H NMR-4h (400 MHz, CDCl<sub>3</sub>)

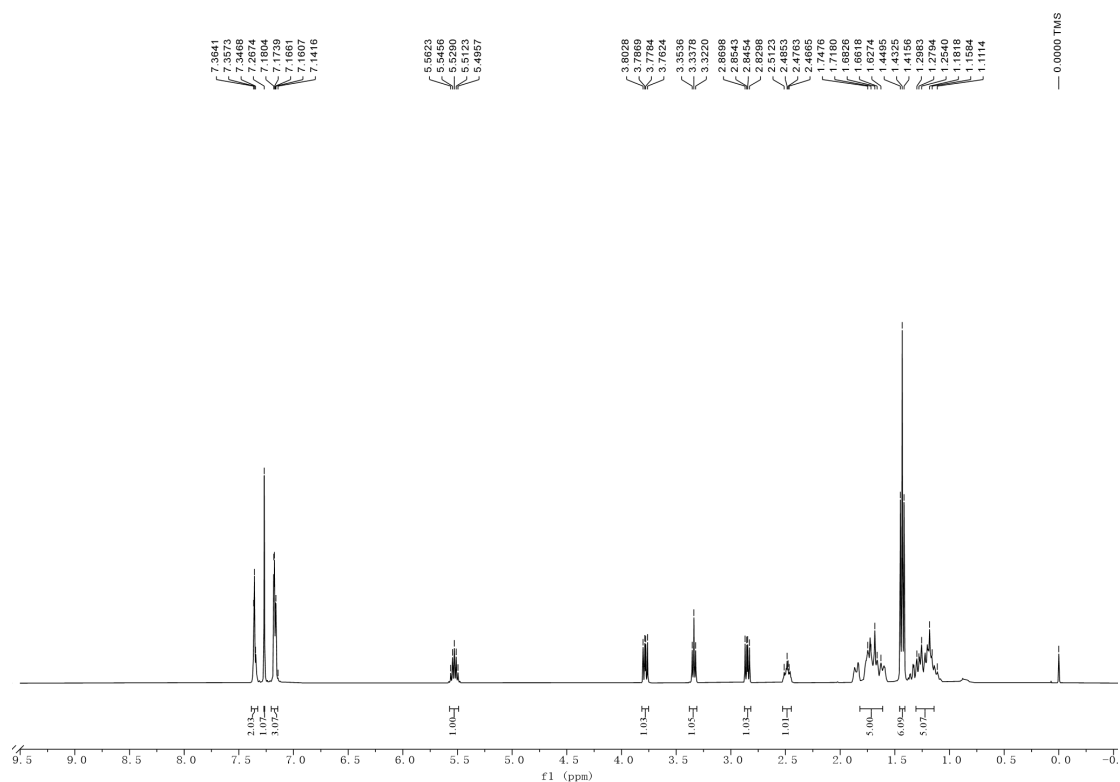

# <sup>13</sup>C NMR-4h (101 MHz, CDCl<sub>3</sub>)

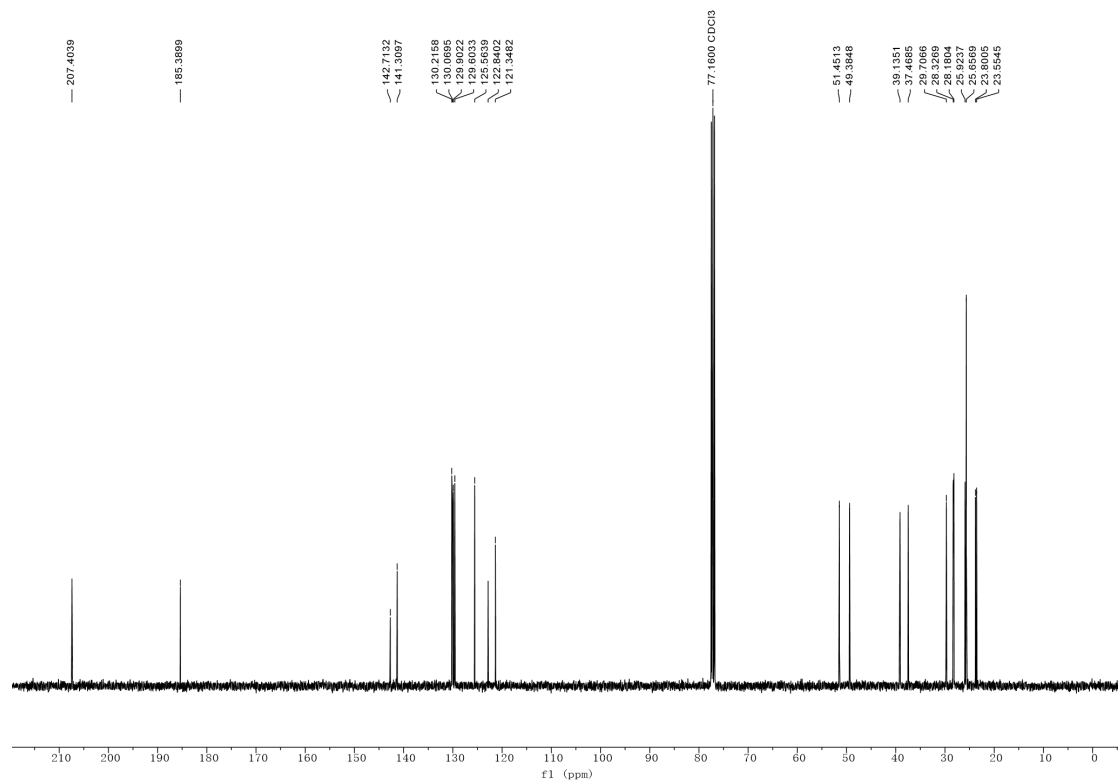

**<sup>1</sup>H NMR-4h (400 MHz, CDCl<sub>3</sub>)**

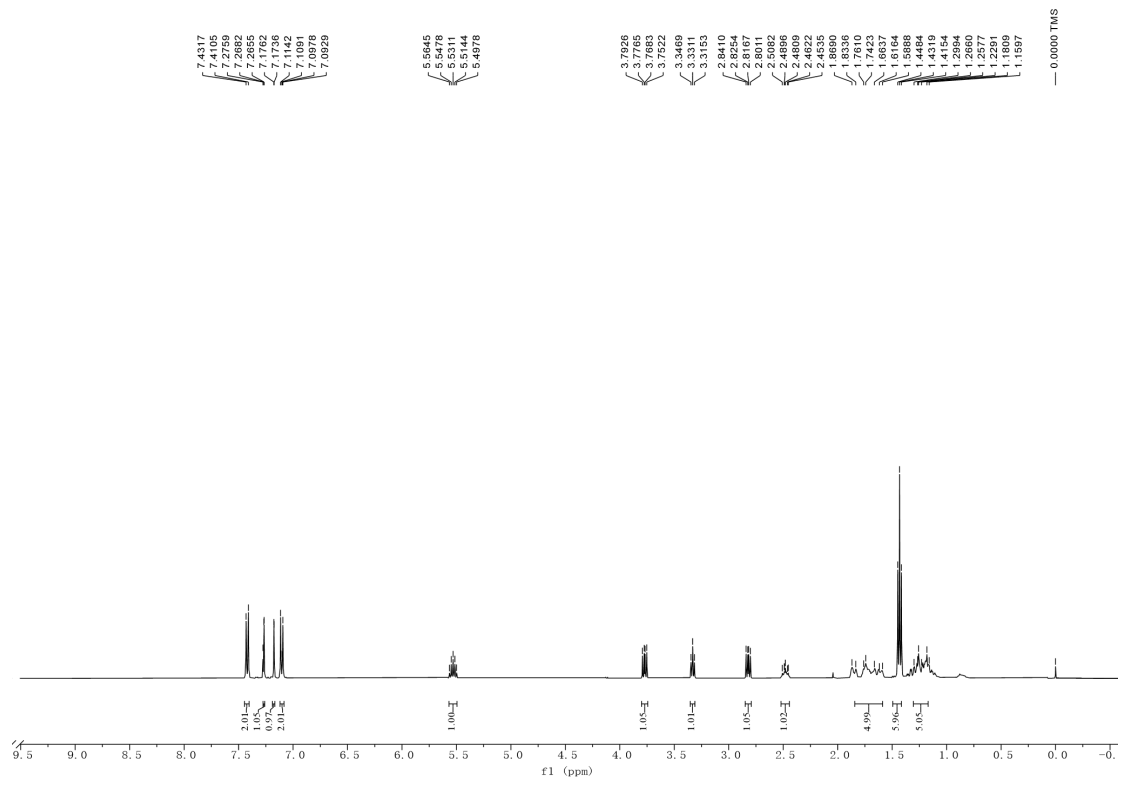

**<sup>13</sup>C NMR-4i (101 MHz, CDCl<sub>3</sub>)**

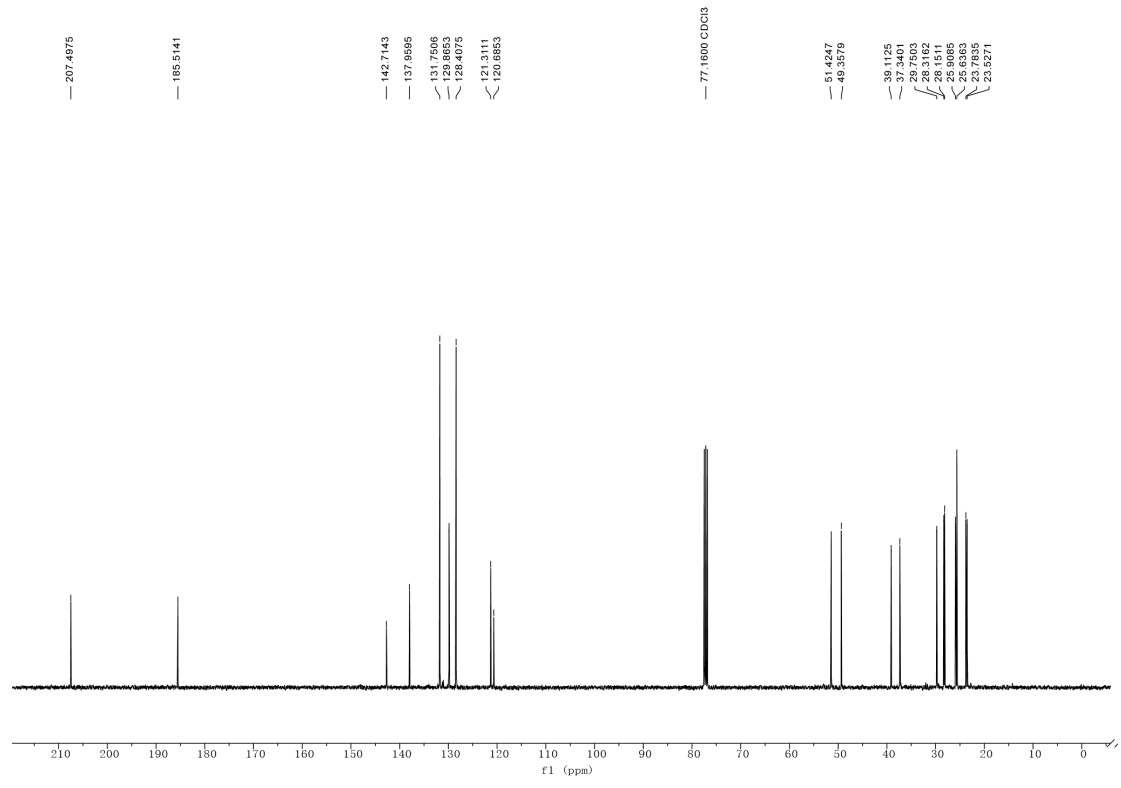

# <sup>1</sup>H NMR-4j (400 MHz, CDCl<sub>3</sub>)

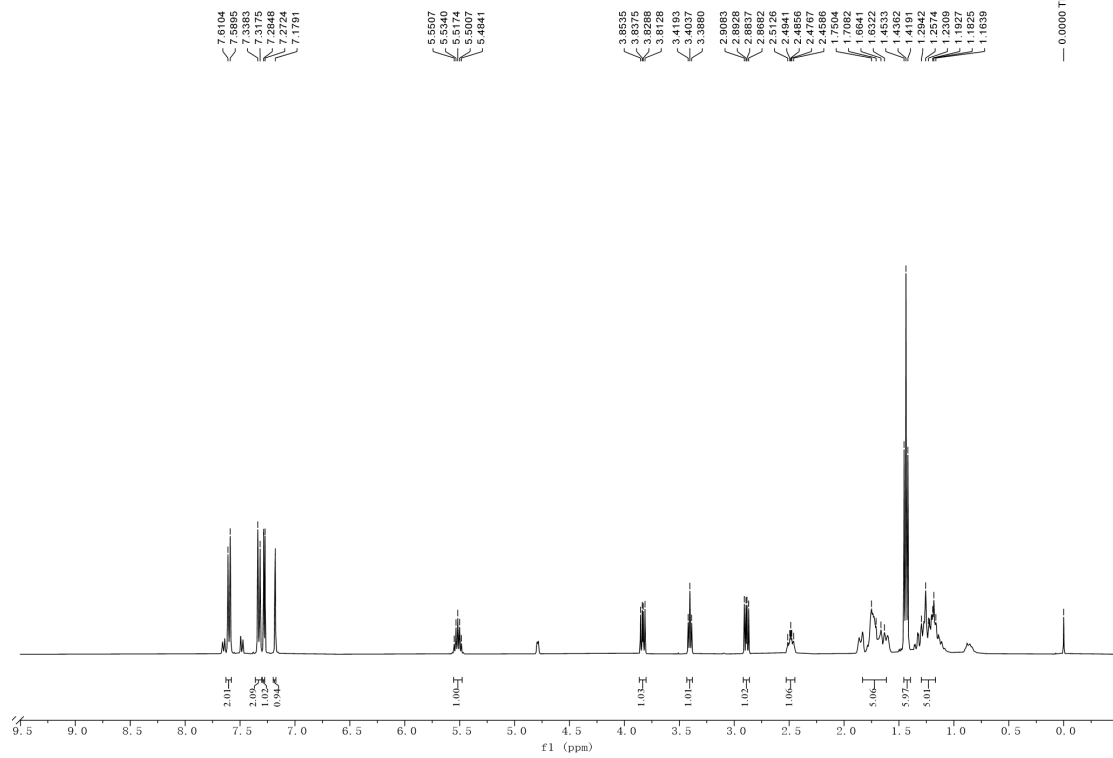

# <sup>13</sup>C NMR-4j (101 MHz, CDCl<sub>3</sub>)

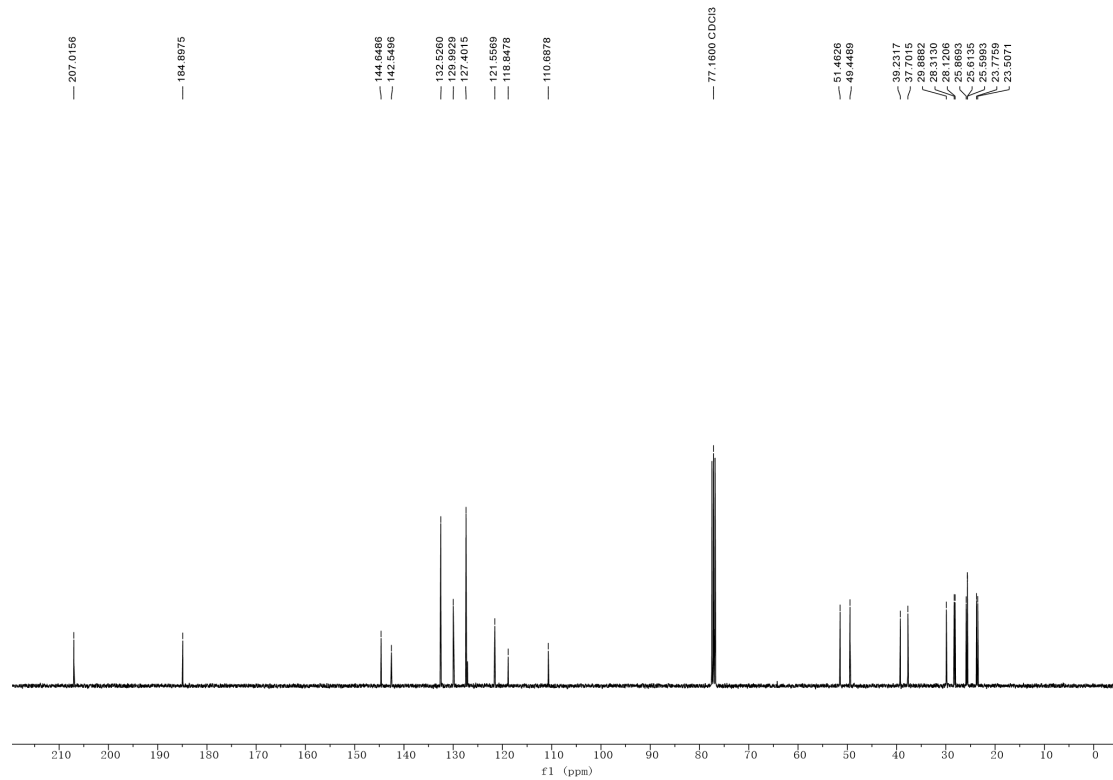



# <sup>1</sup>H NMR-4k (400 MHz, CDCl<sub>3</sub>)

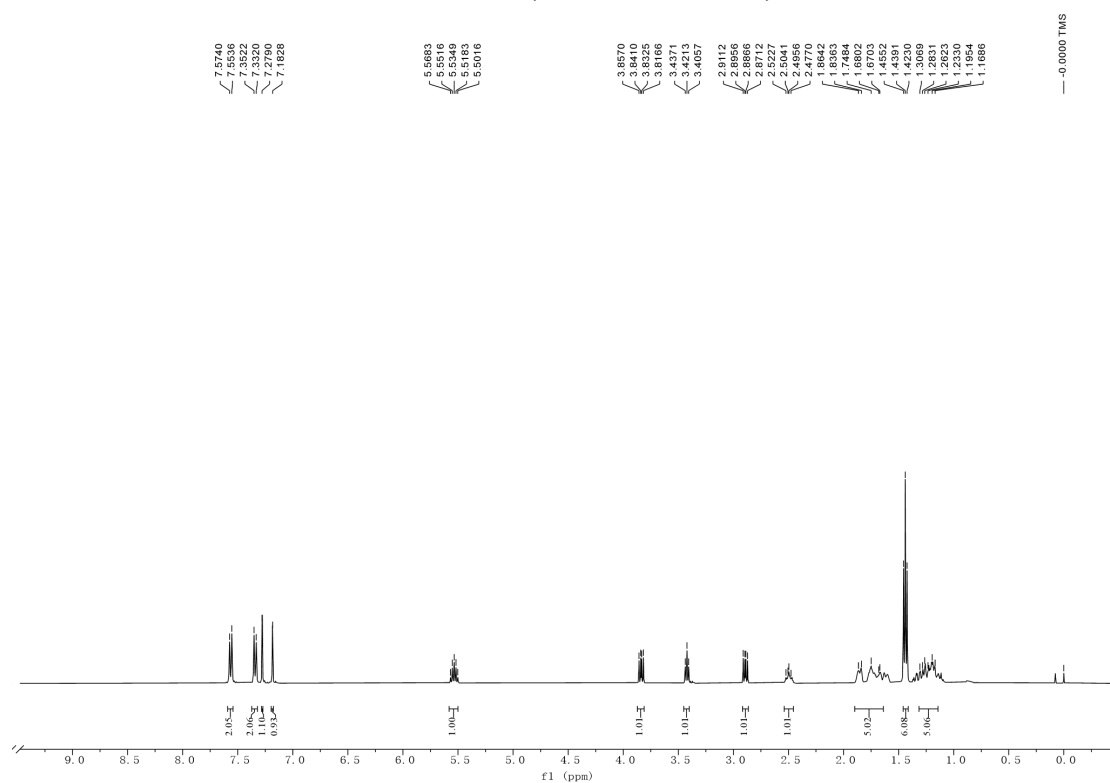

# <sup>13</sup>C NMR-4k (101 MHz, CDCl<sub>3</sub>)

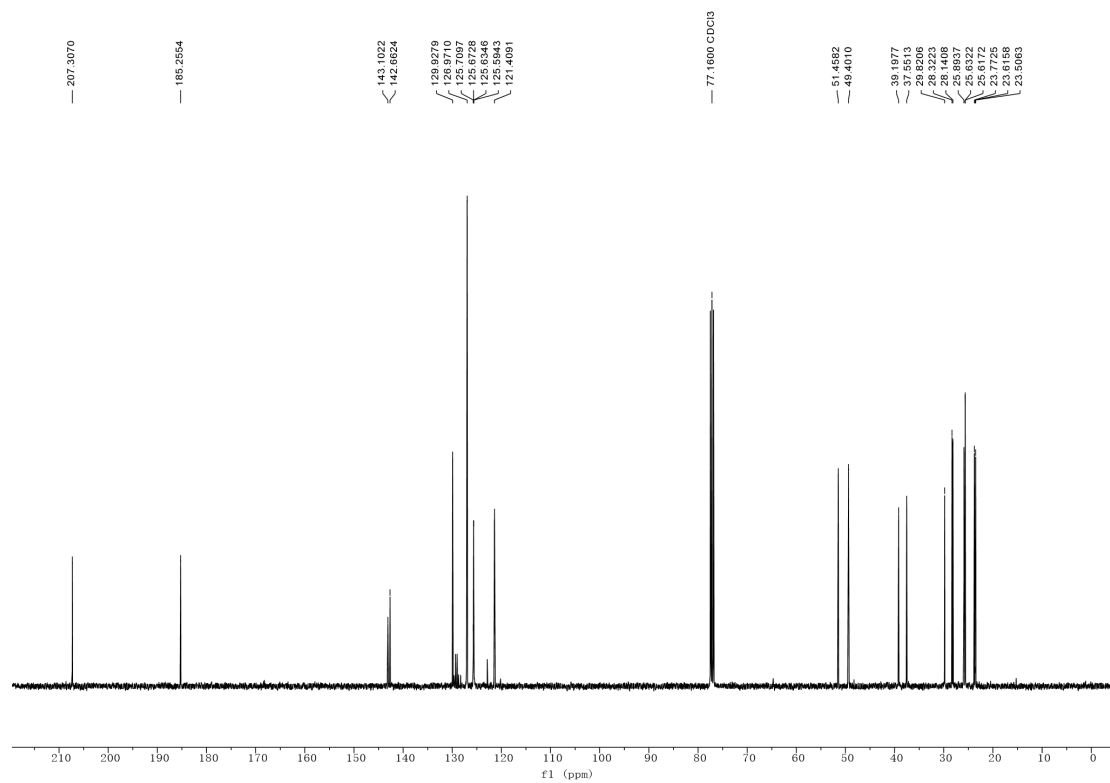

**$^{19}\text{F}$  NMR-4k (376 MHz,  $\text{CDCl}_3$ )**

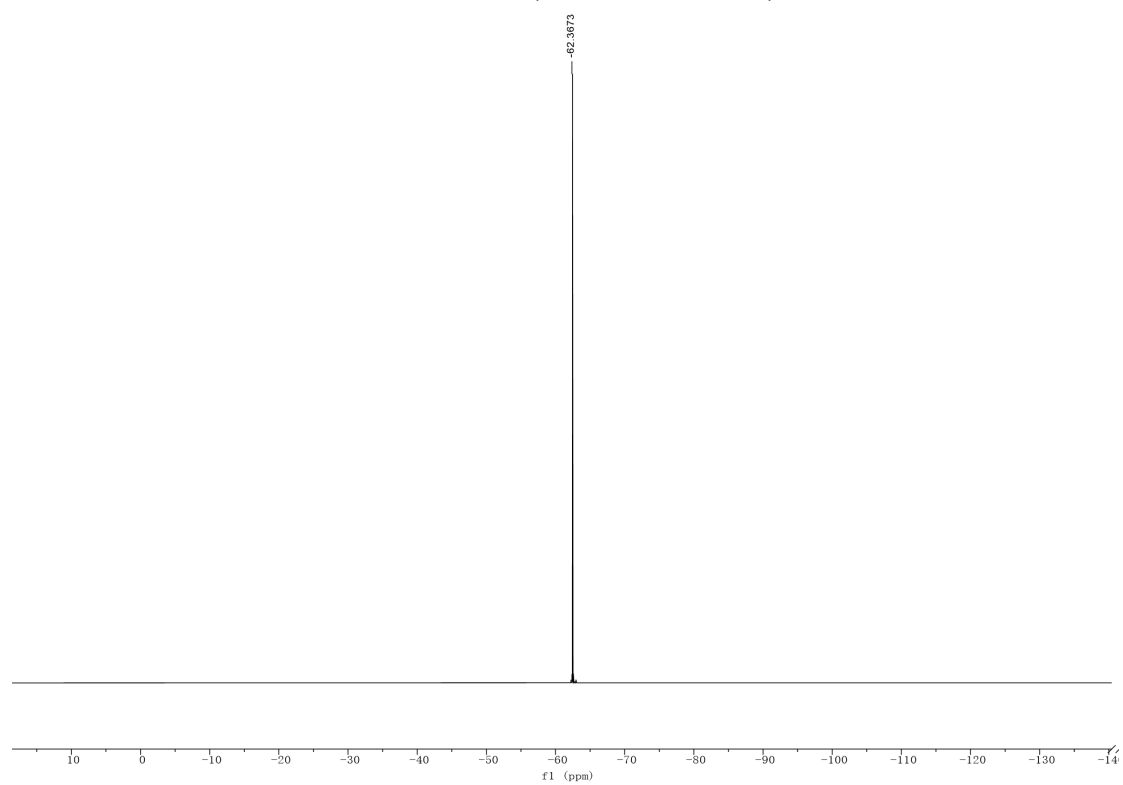

# <sup>1</sup>H NMR-4l (400 MHz, CDCl<sub>3</sub>)

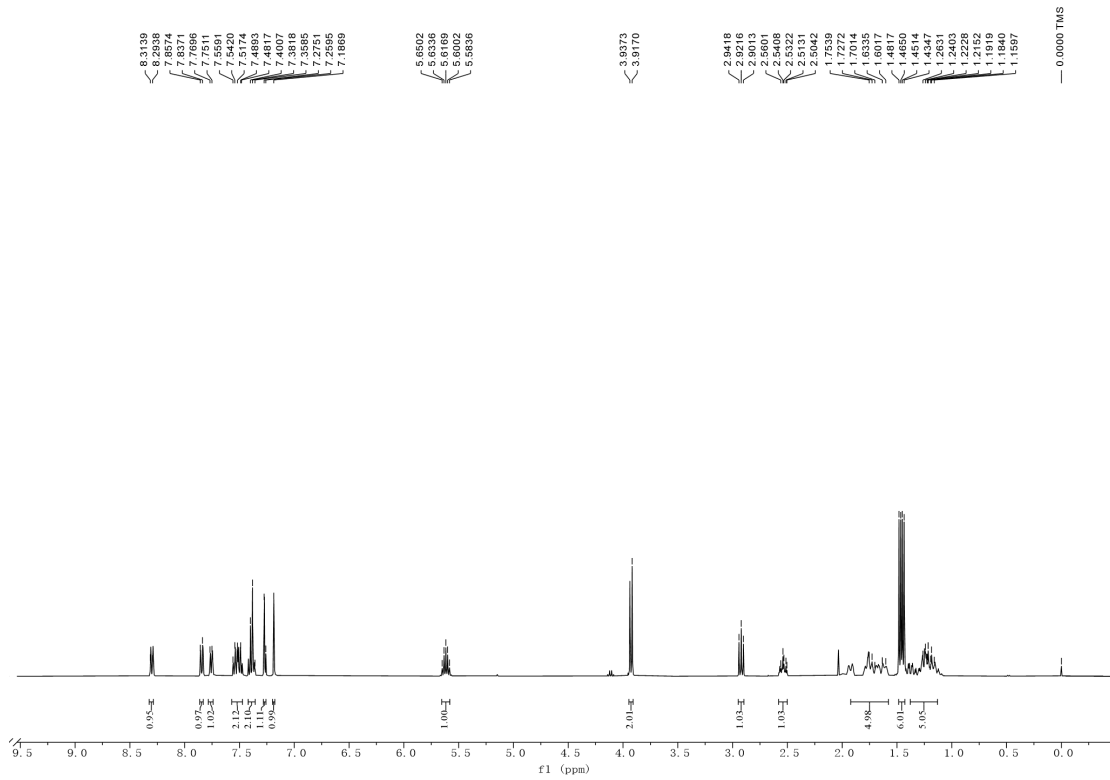

# <sup>13</sup>C NMR-4l (101 MHz, CDCl<sub>3</sub>)

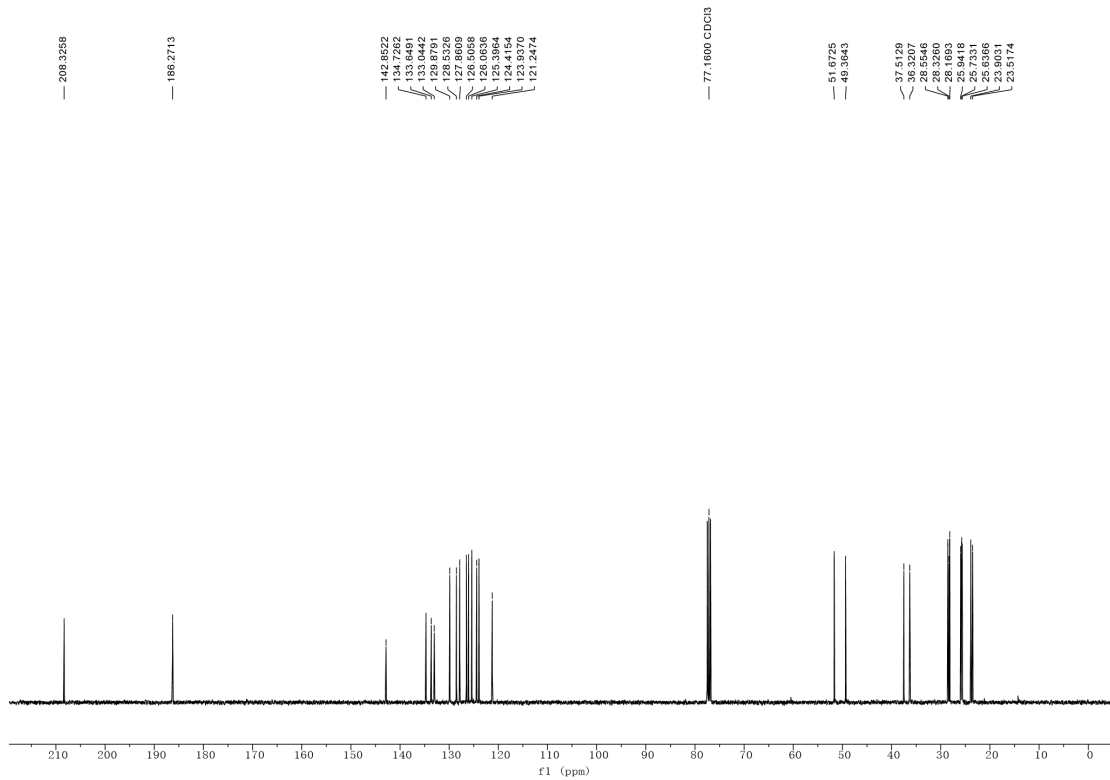

# <sup>1</sup>H NMR-4m (400 MHz, CDCl<sub>3</sub>)

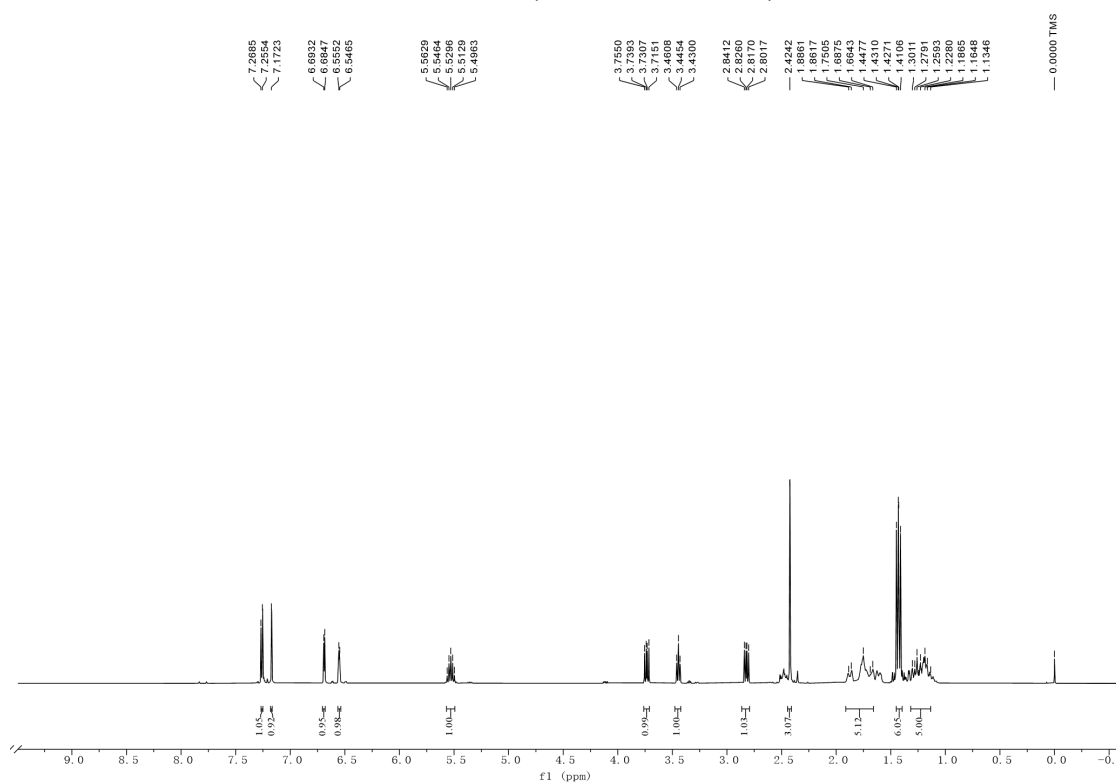

# <sup>13</sup>C NMR-4m (101 MHz, CDCl<sub>3</sub>)

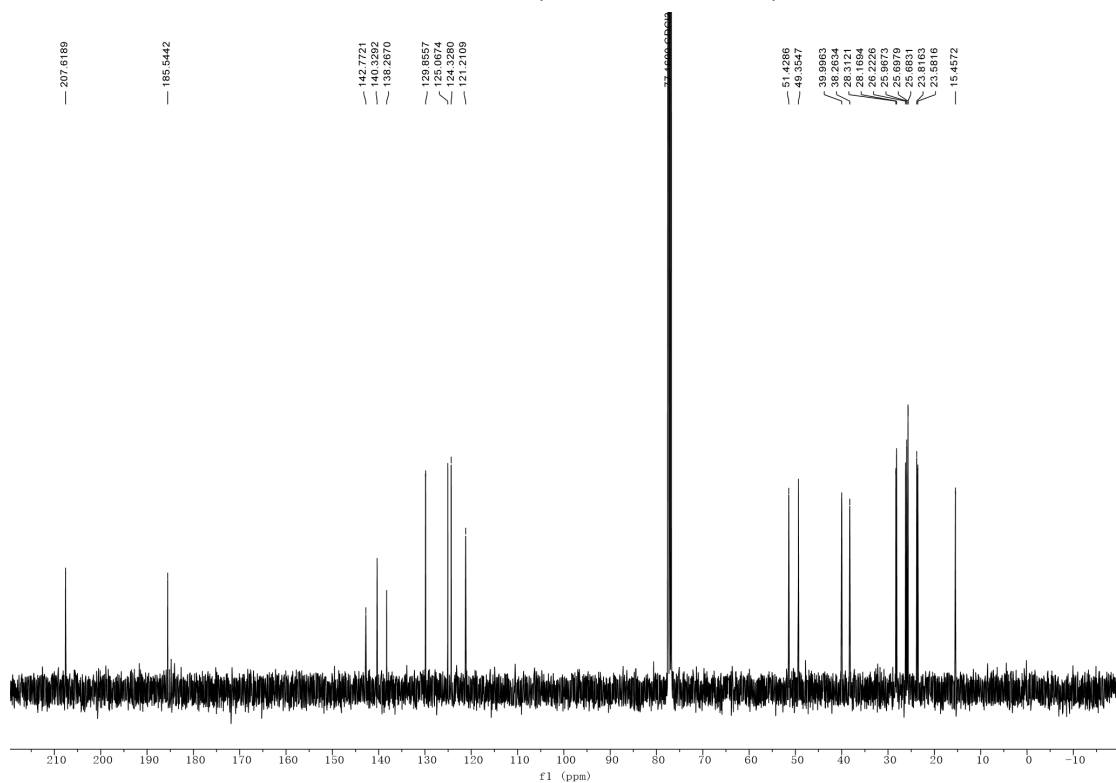

# <sup>1</sup>H NMR-4n (400 MHz, CDCl<sub>3</sub>)

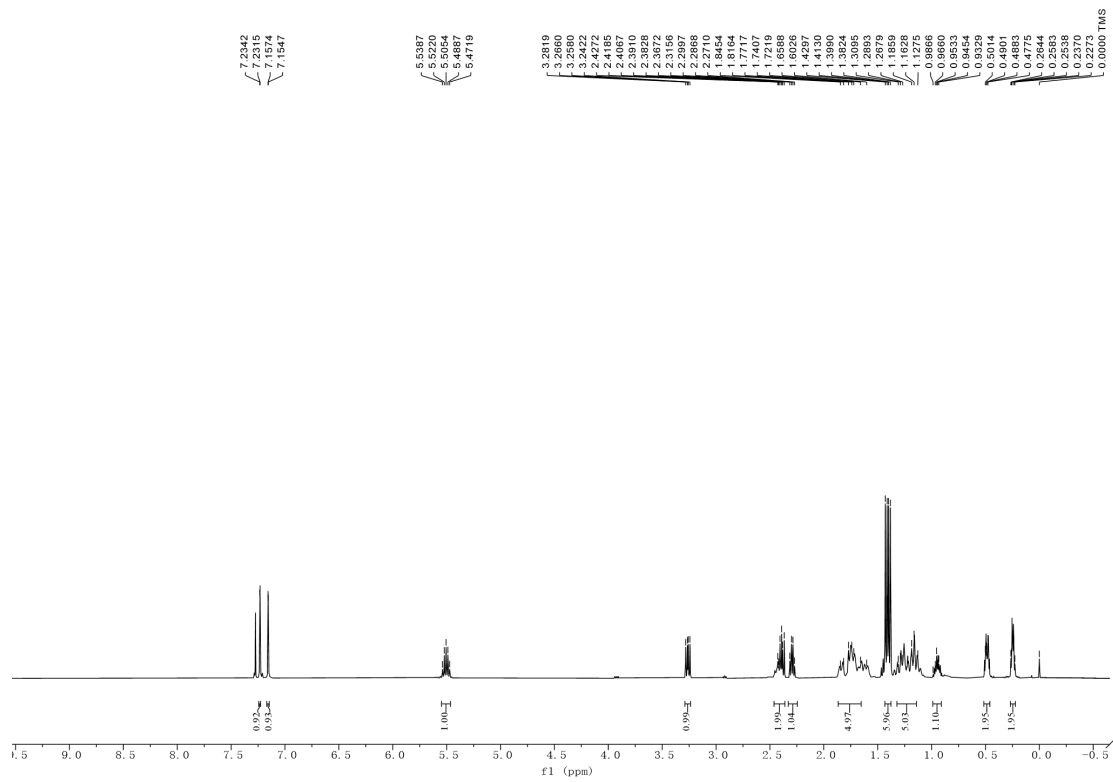

# <sup>13</sup>C NMR-4n (101 MHz, CDCl<sub>3</sub>)

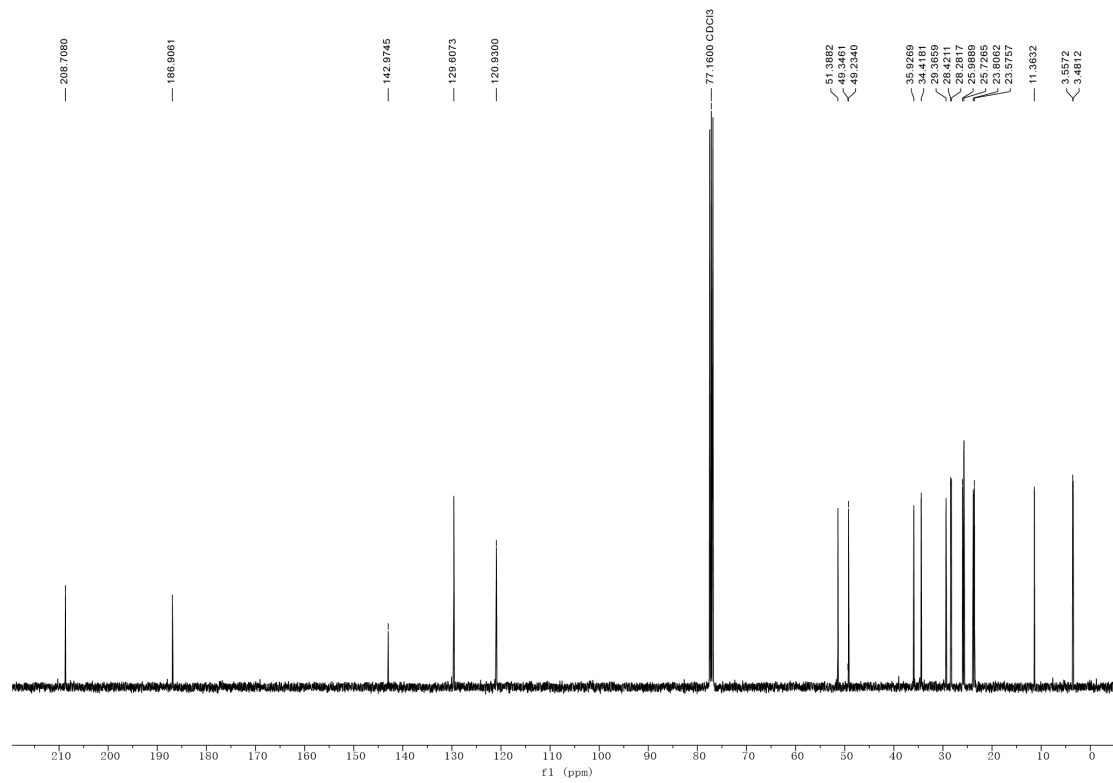

# <sup>1</sup>H NMR-4o (400 MHz, CDCl<sub>3</sub>)

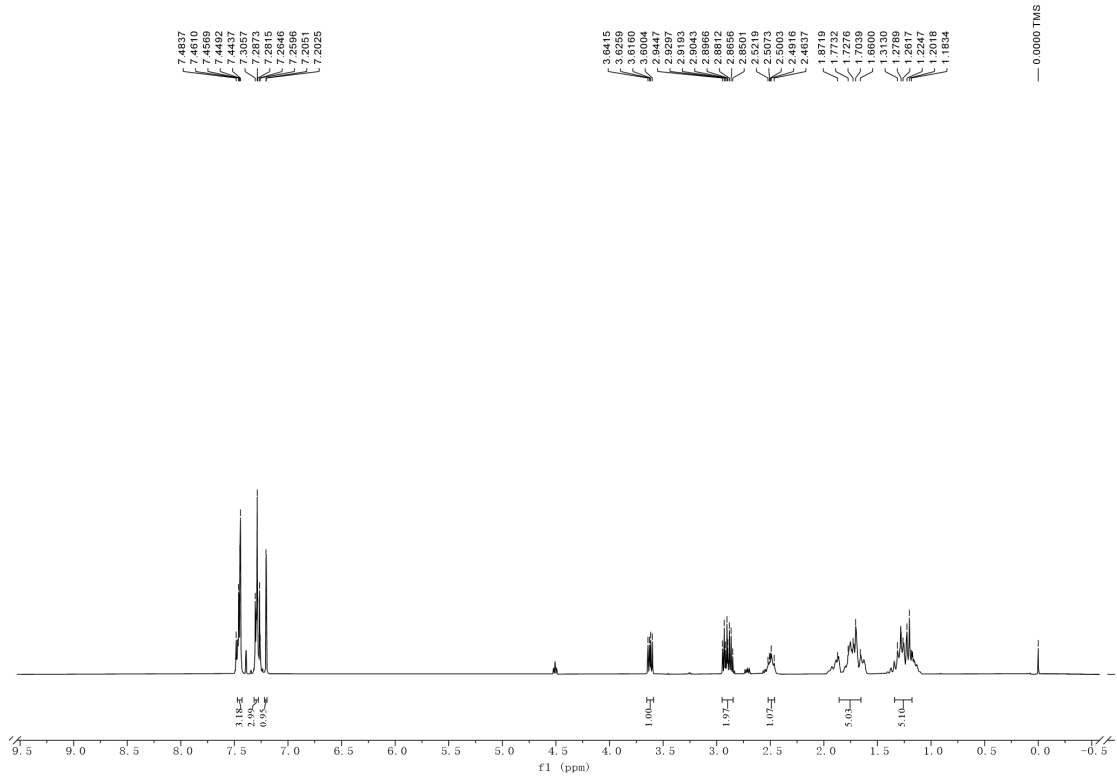

# <sup>13</sup>C NMR-4o (101 MHz, CDCl<sub>3</sub>)

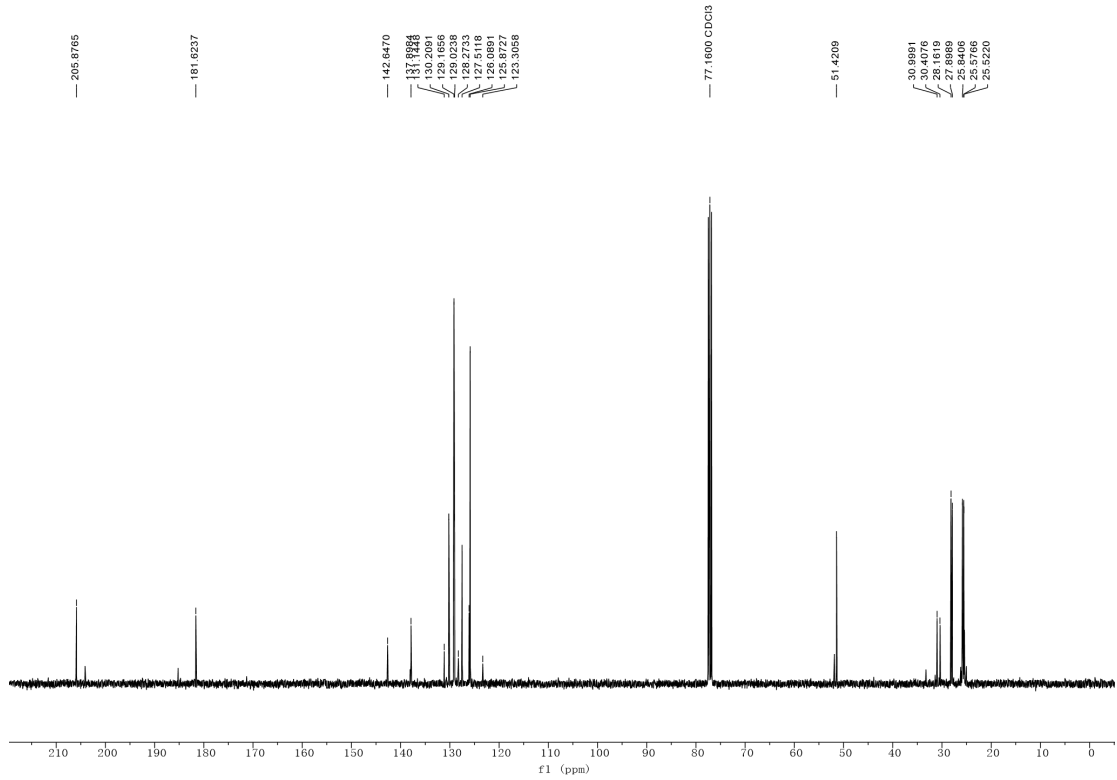

**<sup>19</sup>F NMR-4o (376 MHz, CDCl<sub>3</sub>)**

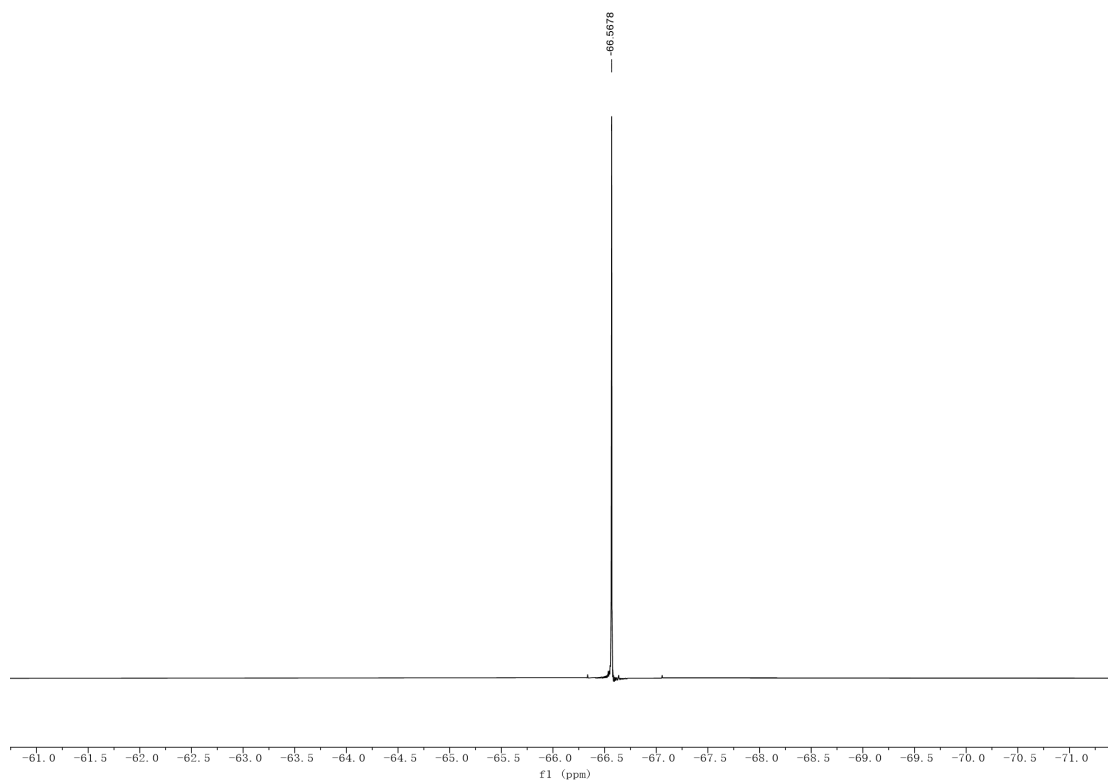

# <sup>1</sup>H NMR-4p (400 MHz, CDCl<sub>3</sub>)

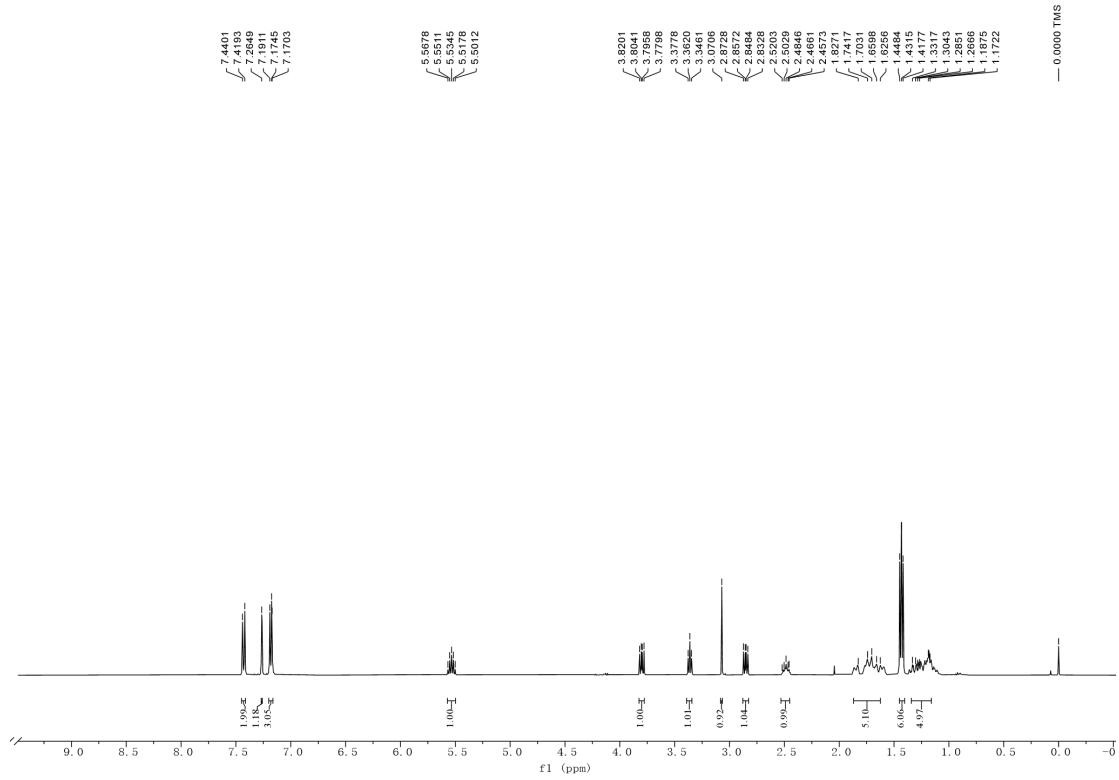

# <sup>13</sup>C NMR-4p (101 MHz, CDCl<sub>3</sub>)

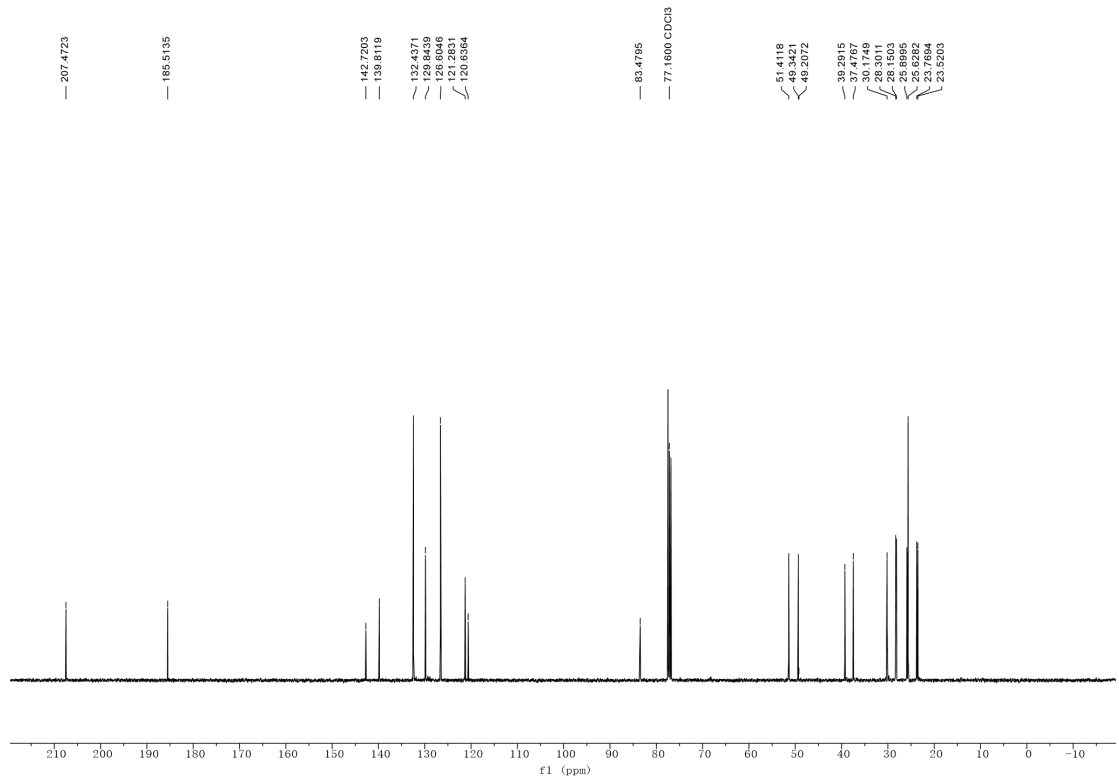



# <sup>1</sup>H NMR-5a (400 MHz, CDCl<sub>3</sub>)

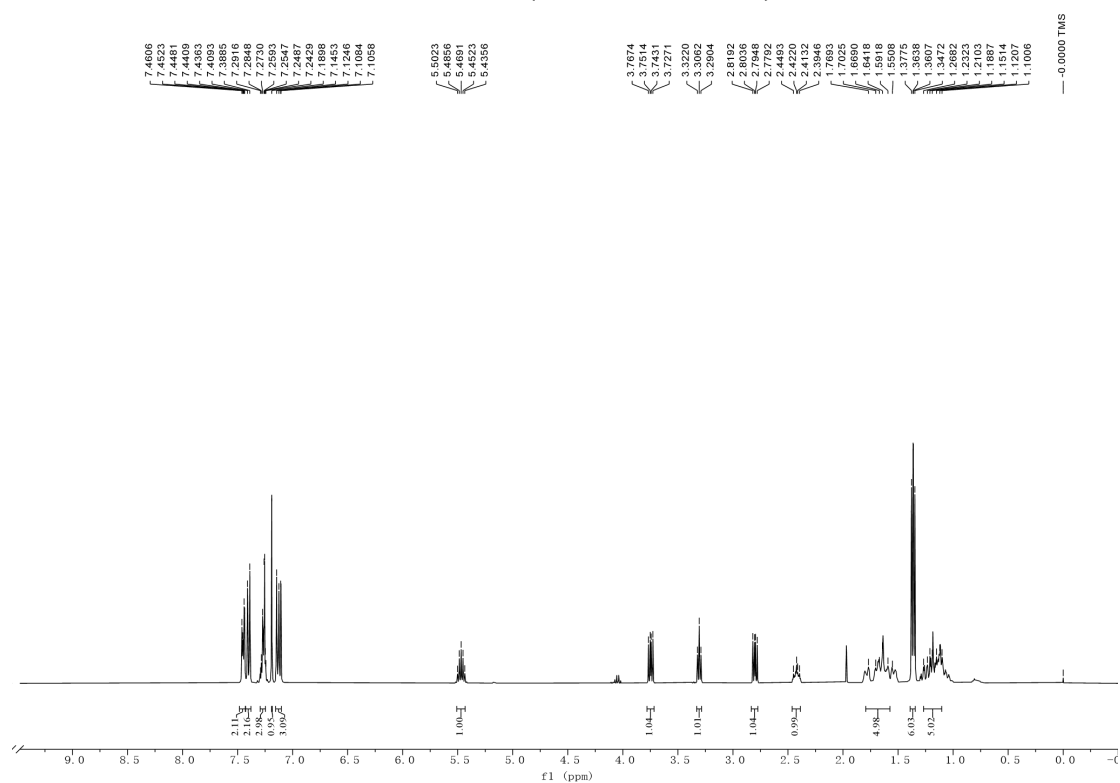

# <sup>13</sup>C NMR-5a (101 MHz, CDCl<sub>3</sub>)

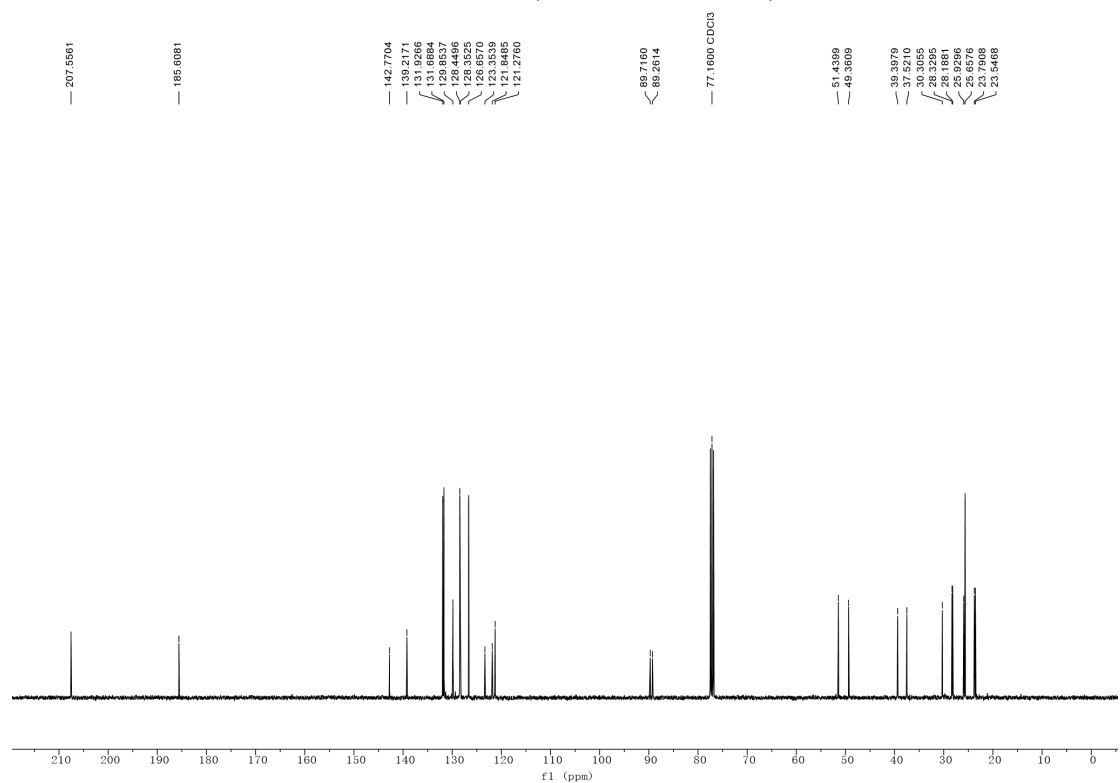

# <sup>1</sup>H NMR-6a (400 MHz, CDCl<sub>3</sub>)

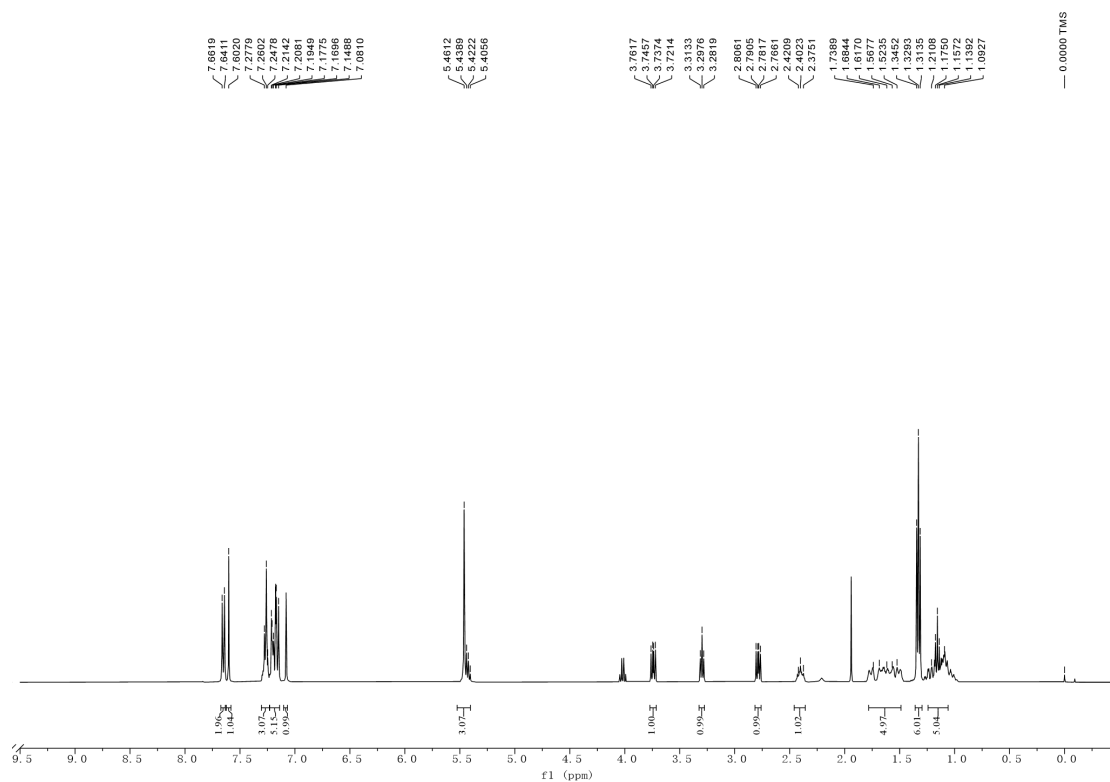

# <sup>13</sup>C NMR-6a (101 MHz, CDCl<sub>3</sub>)

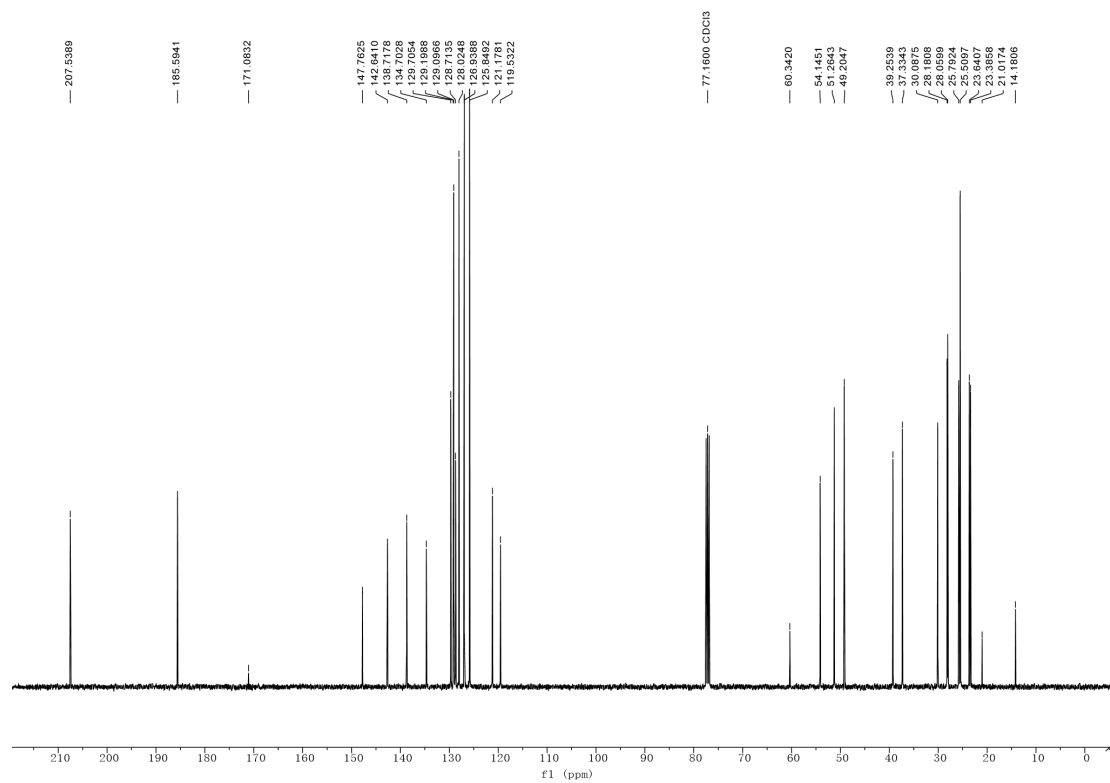

## VIII HPLC Traces on Chiral Stationary Phase

### racemic-3a

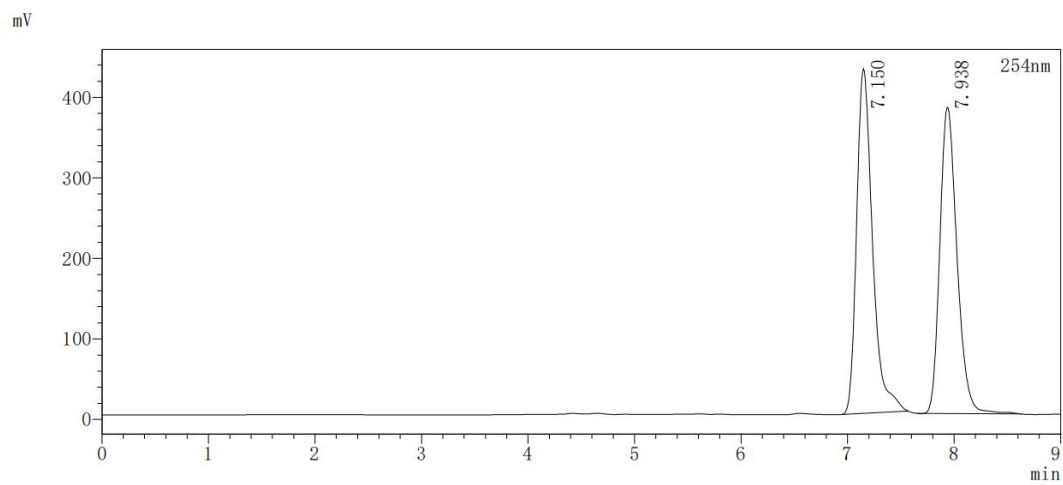

254nm

| Peak# | Ret. Time | Area    | Height | Area%   |
|-------|-----------|---------|--------|---------|
| 1     | 7.150     | 4431199 | 427891 | 50.978  |
| 2     | 7.938     | 4261187 | 380437 | 49.022  |
| Total |           | 8692385 | 808327 | 100.000 |

### chiral-3a

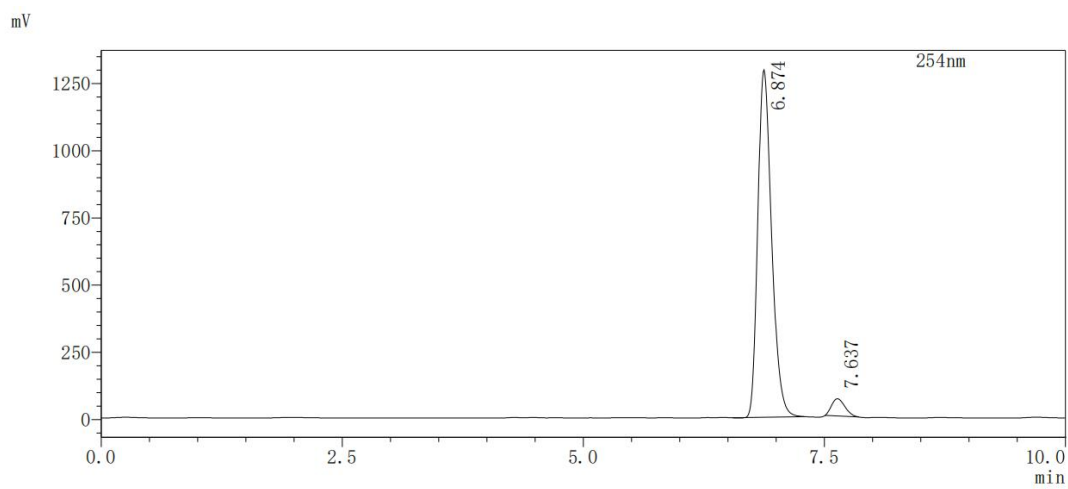

254nm

| Peak# | Ret. Time | Area     | Height  | Area%   |
|-------|-----------|----------|---------|---------|
| 1     | 6.874     | 12882806 | 1293020 | 95.458  |
| 2     | 7.637     | 613032   | 64071   | 4.542   |
| Total |           | 13495838 | 1357091 | 100.000 |

### racemic-3b

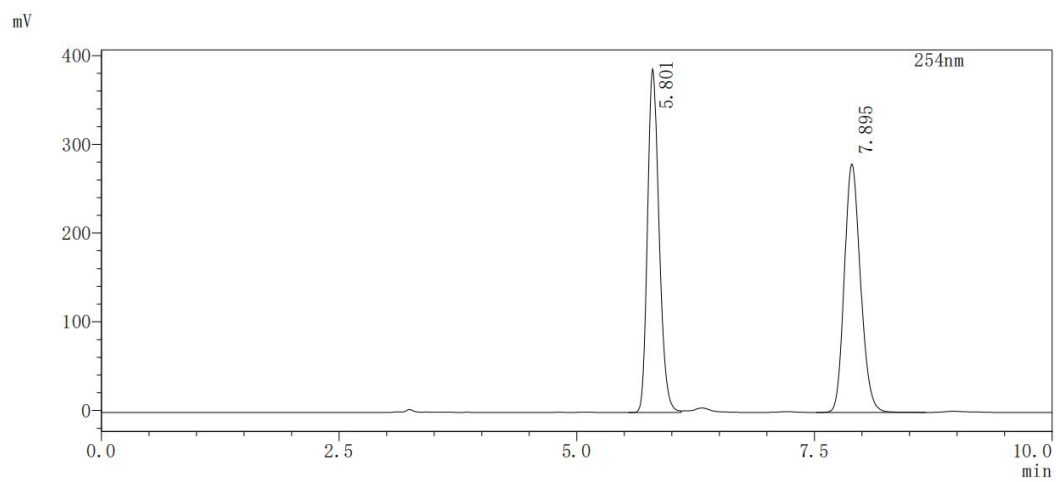

| Peak# | Ret. Time | Area    | Height | Area%   |
|-------|-----------|---------|--------|---------|
| 1     | 5.801     | 3287387 | 386969 | 49.724  |
| 2     | 7.895     | 3323894 | 279969 | 50.276  |
| Total |           | 6611281 | 666938 | 100.000 |

### chiral-3b

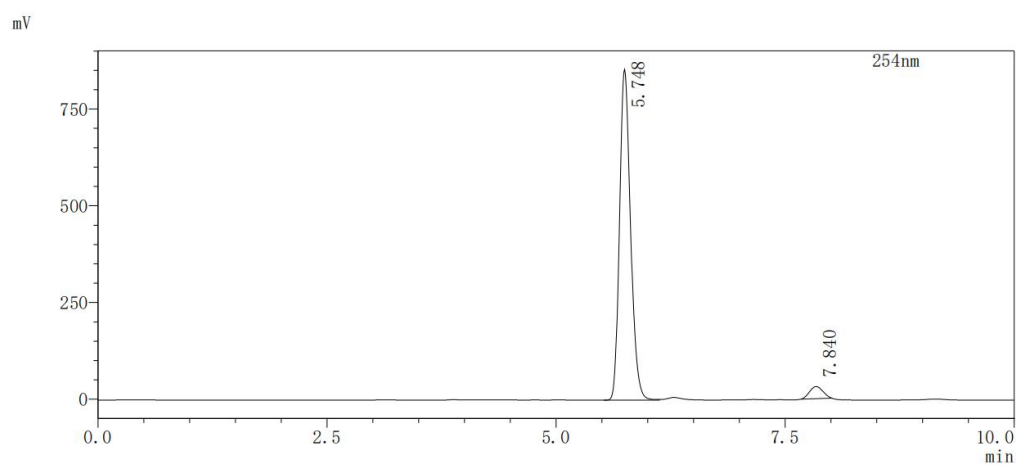

| Peak# | Ret. Time | Area    | Height | Area%   |
|-------|-----------|---------|--------|---------|
| 1     | 5.748     | 7154201 | 854720 | 95.814  |
| 2     | 7.840     | 312541  | 30885  | 4.186   |
| Total |           | 7466742 | 885605 | 100.000 |

### racemic-3c

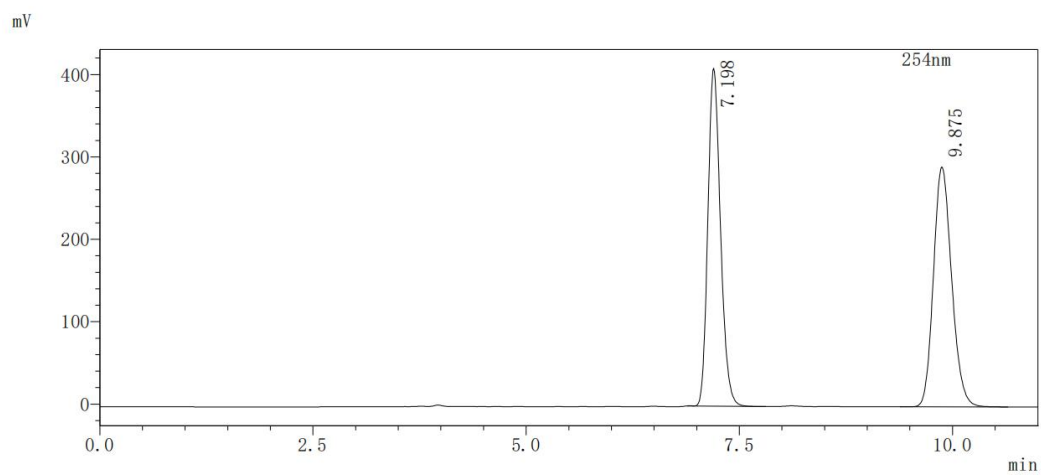

| Peak# | Ret. Time | Area    | Height | Area%   |
|-------|-----------|---------|--------|---------|
| 1     | 7.198     | 4217333 | 409764 | 49.379  |
| 2     | 9.875     | 4323440 | 291164 | 50.621  |
| Total |           | 8540773 | 700927 | 100.000 |

### chiral-3c

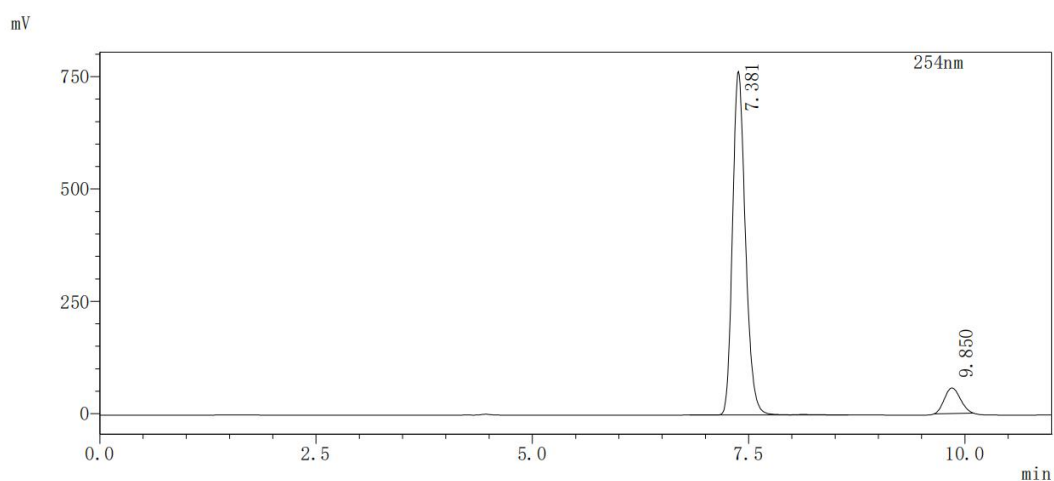

| Peak# | Ret. Time | Area    | Height | Area%   |
|-------|-----------|---------|--------|---------|
| 1     | 7.381     | 7915016 | 764406 | 91.509  |
| 2     | 9.850     | 734464  | 57231  | 8.491   |
| Total |           | 8649480 | 821637 | 100.000 |

### racemic-3d

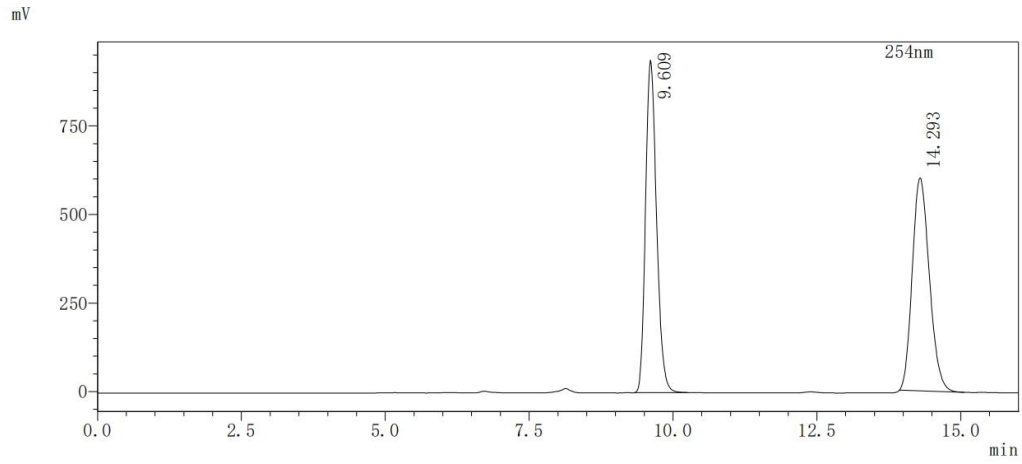

| Peak# | Ret. Time | Area     | Height  | Area%   |
|-------|-----------|----------|---------|---------|
| 1     | 9.609     | 12474531 | 937230  | 50.092  |
| 2     | 14.293    | 12428629 | 600893  | 49.908  |
| Total |           | 24903160 | 1538123 | 100.000 |

### chiral-3d

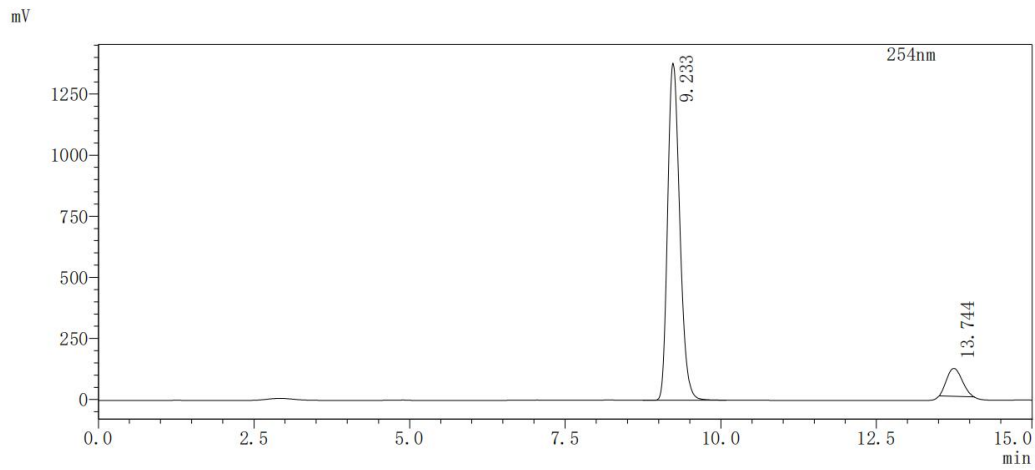

| Peak# | Ret. Time | Area     | Height  | Area%   |
|-------|-----------|----------|---------|---------|
| 1     | 9.233     | 18584314 | 1378770 | 90.472  |
| 2     | 13.744    | 1957295  | 113781  | 9.528   |
| Total |           | 20541609 | 1492551 | 100.000 |

### racemic-3e

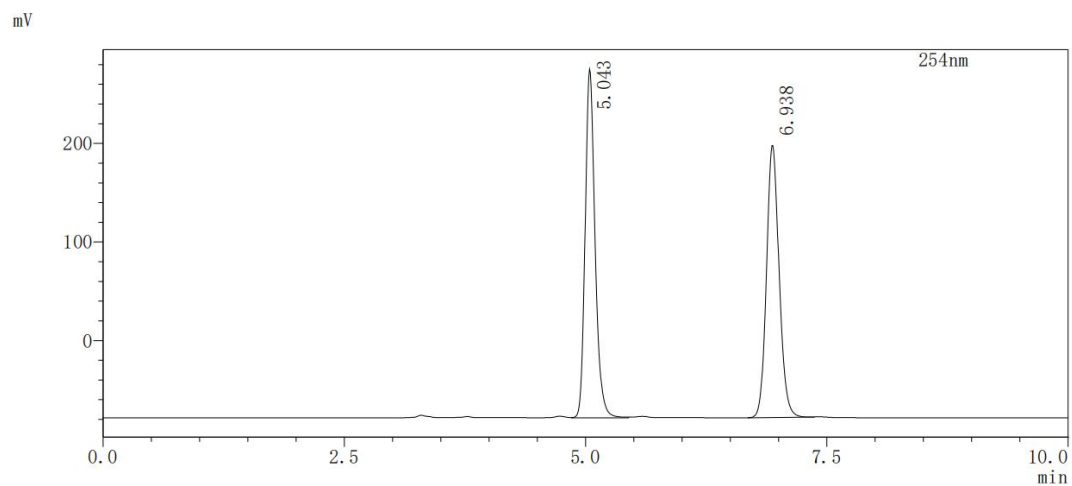

| Peak# | Ret. Time | Area    | Height | Area%   |
|-------|-----------|---------|--------|---------|
| 1     | 5.043     | 2529123 | 353738 | 50.158  |
| 2     | 6.938     | 2513229 | 275788 | 49.842  |
| Total |           | 5042352 | 629526 | 100.000 |

### chiral-3e

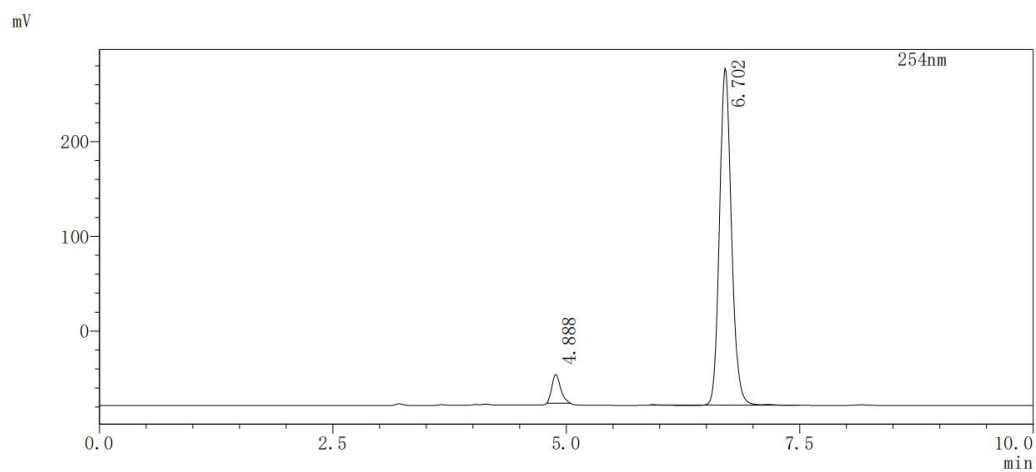

| Peak# | Ret. Time | Area    | Height | Area%   |
|-------|-----------|---------|--------|---------|
| 1     | 4.888     | 197790  | 30235  | 5.904   |
| 2     | 6.702     | 3152155 | 355368 | 94.096  |
| Total |           | 3349945 | 385603 | 100.000 |

### racemic-3f

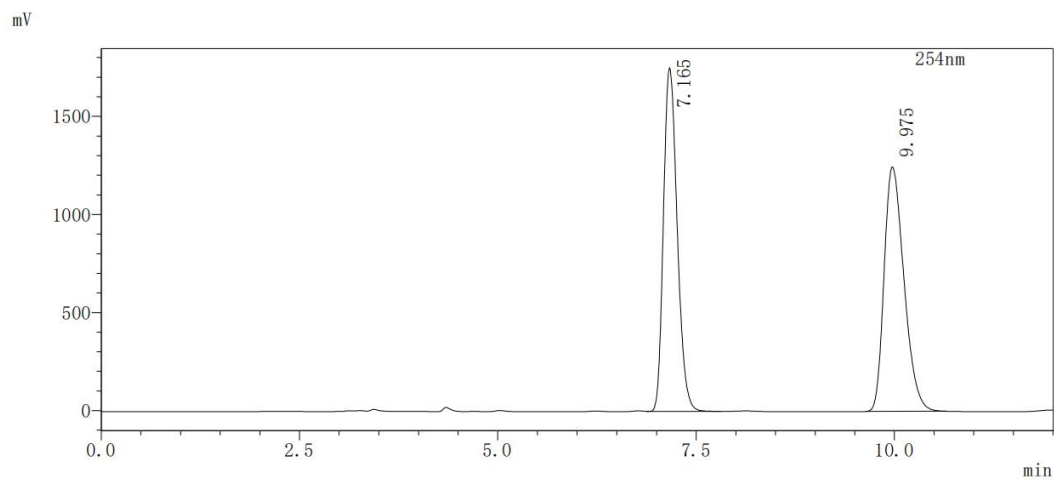

| Peak# | Ret. Time | Area     | Height  | Area%   |
|-------|-----------|----------|---------|---------|
| 1     | 7.165     | 21070958 | 1751103 | 49.218  |
| 2     | 9.975     | 21740420 | 1247047 | 50.782  |
| Total |           | 42811378 | 2998150 | 100.000 |

### chiral-3f

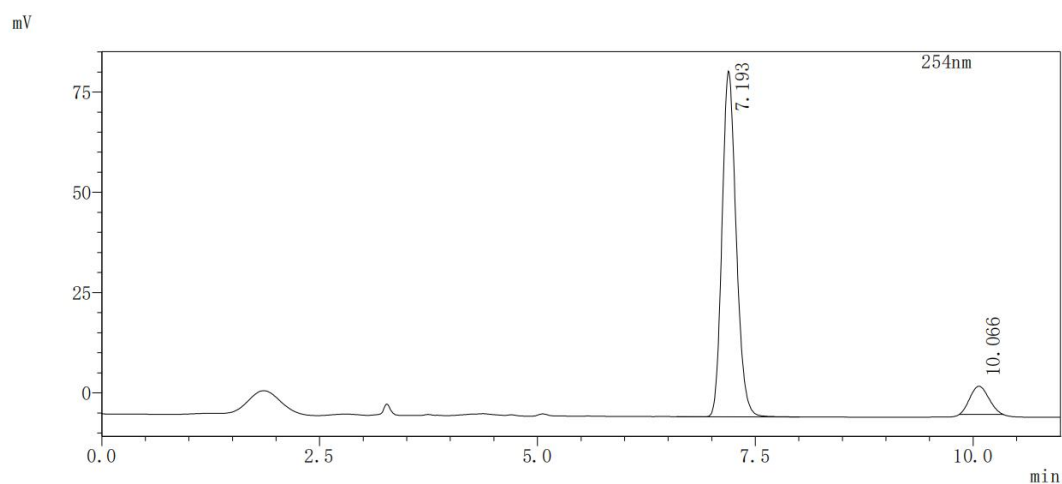

| Peak# | Ret. Time | Area    | Height | Area%   |
|-------|-----------|---------|--------|---------|
| 1     | 7.193     | 972408  | 86205  | 90.290  |
| 2     | 10.066    | 104577  | 7007   | 9.710   |
| Total |           | 1076985 | 93212  | 100.000 |



### racemic-3g

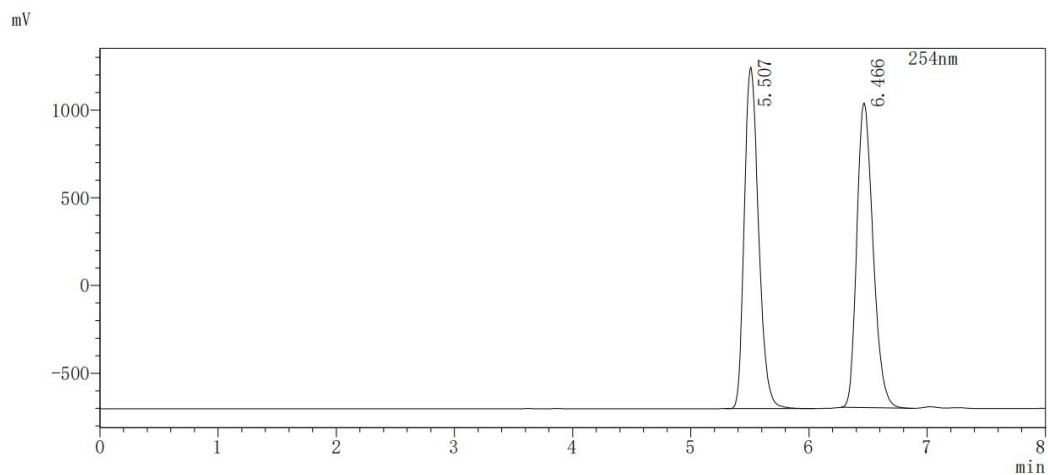

| Peak# | Ret. Time | Area     | Height  | Area%   |
|-------|-----------|----------|---------|---------|
| 1     | 5.507     | 16365731 | 1944008 | 49.673  |
| 2     | 6.466     | 16581254 | 1734591 | 50.327  |
| Total |           | 32946985 | 3678599 | 100.000 |

### chiral-3g

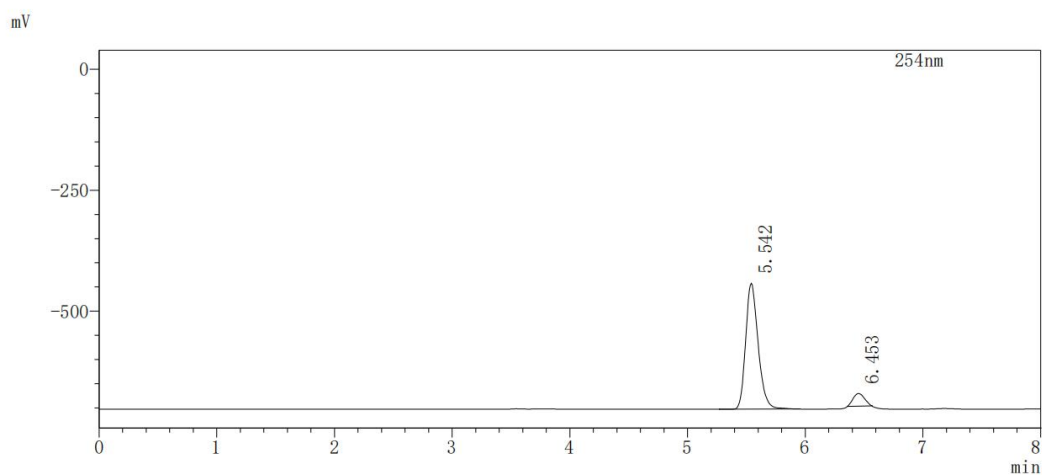

| Peak# | Ret. Time | Area    | Height | Area%   |
|-------|-----------|---------|--------|---------|
| 1     | 5.542     | 1920565 | 260332 | 91.479  |
| 2     | 6.453     | 178905  | 26299  | 8.521   |
| Total |           | 2099470 | 286631 | 100.000 |

### racemic-3h

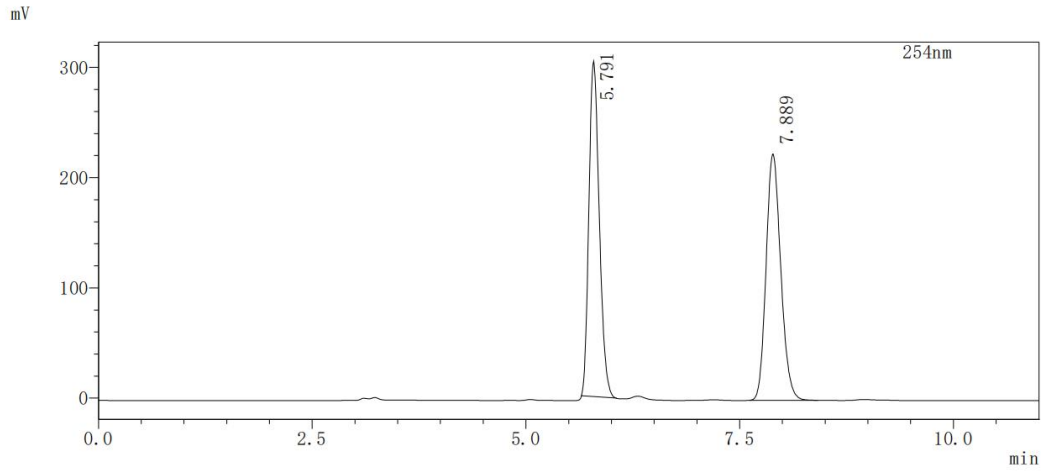

| Peak# | Ret. Time | Area    | Height | Area%   |
|-------|-----------|---------|--------|---------|
| 1     | 5.791     | 2573642 | 304342 | 49.107  |
| 2     | 7.889     | 2667254 | 223385 | 50.893  |
| Total |           | 5240895 | 527727 | 100.000 |

### chiral-3h

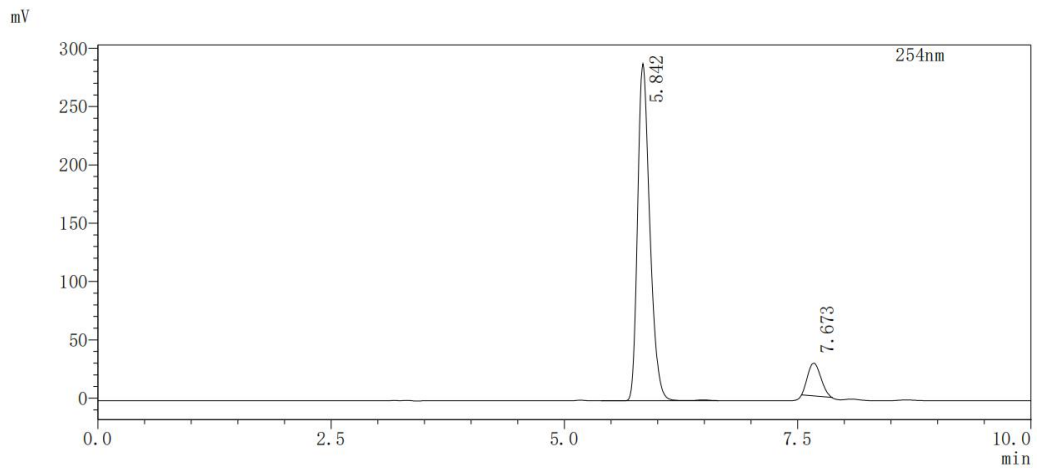

| Peak# | Ret. Time | Area    | Height | Area%   |
|-------|-----------|---------|--------|---------|
| 1     | 5.842     | 2623864 | 288844 | 90.542  |
| 2     | 7.673     | 274098  | 28034  | 9.458   |
| Total |           | 2897962 | 316878 | 100.000 |

### racemic-3i

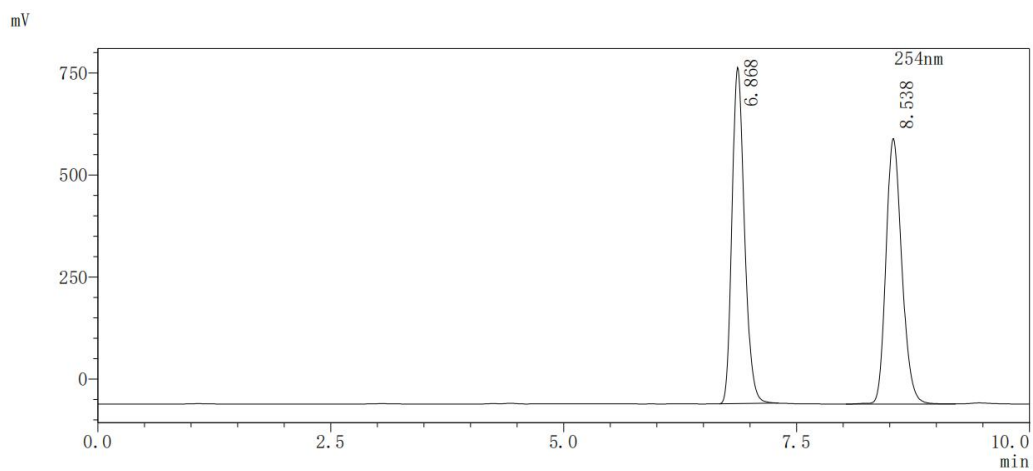

| Peak# | Ret. Time | Area     | Height  | Area%   |
|-------|-----------|----------|---------|---------|
| 1     | 6.868     | 7680333  | 823497  | 49.894  |
| 2     | 8.538     | 7712905  | 650235  | 50.106  |
| Total |           | 15393238 | 1473731 | 100.000 |

### chiral-3i

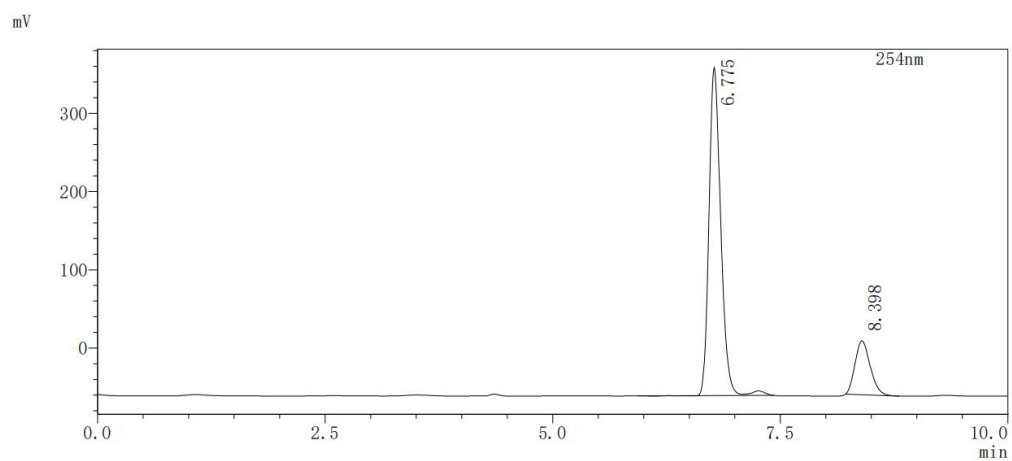

| Peak# | Ret. Time | Area    | Height | Area%   |
|-------|-----------|---------|--------|---------|
| 1     | 6.775     | 3802371 | 419131 | 82.643  |
| 2     | 8.398     | 798606  | 68891  | 17.357  |
| Total |           | 4600977 | 488021 | 100.000 |

### racemic-3j

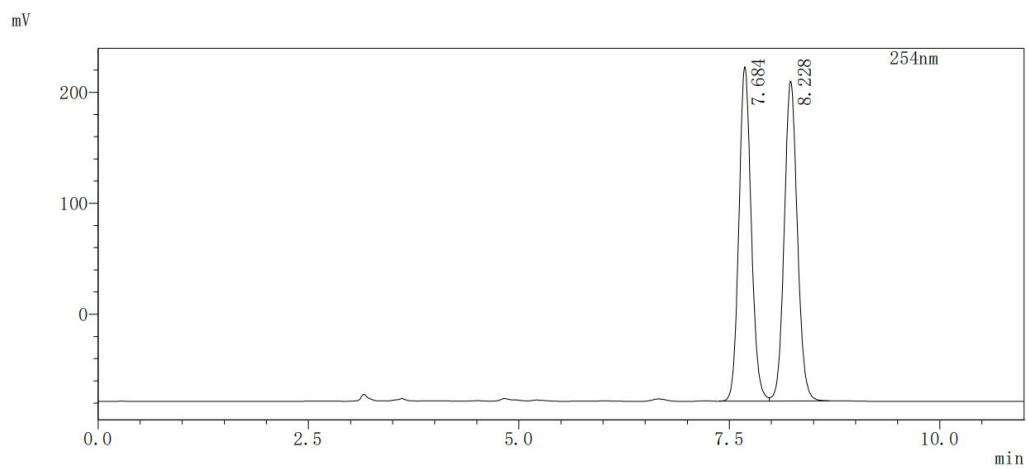

| Peak# | Ret. Time | Area    | Height | Area%   |
|-------|-----------|---------|--------|---------|
| 1     | 7.684     | 3072639 | 301156 | 49.583  |
| 2     | 8.228     | 3124363 | 288218 | 50.417  |
| Total |           | 6197002 | 589374 | 100.000 |

c

### hiral-3j

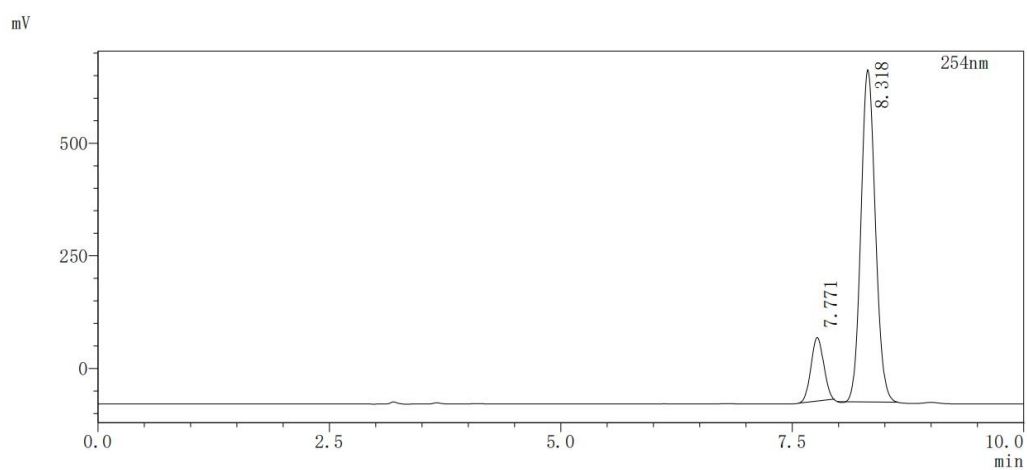

| Peak# | Ret. Time | Area    | Height | Area%   |
|-------|-----------|---------|--------|---------|
| 1     | 7.771     | 1353653 | 141061 | 14.495  |
| 2     | 8.318     | 7984896 | 737006 | 85.505  |
| Total |           | 9338548 | 878067 | 100.000 |

### racemic-3k

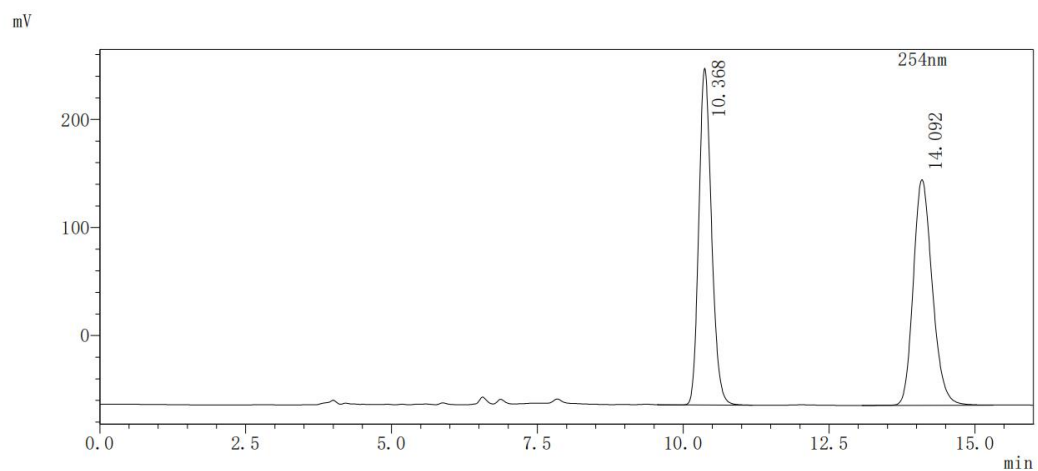

| Peak# | Ret. Time | Area    | Height | Area%   |
|-------|-----------|---------|--------|---------|
| 1     | 10.368    | 4710131 | 311569 | 49.809  |
| 2     | 14.092    | 4746338 | 208889 | 50.191  |
| Total |           | 9456469 | 520458 | 100.000 |

### chiral-3k

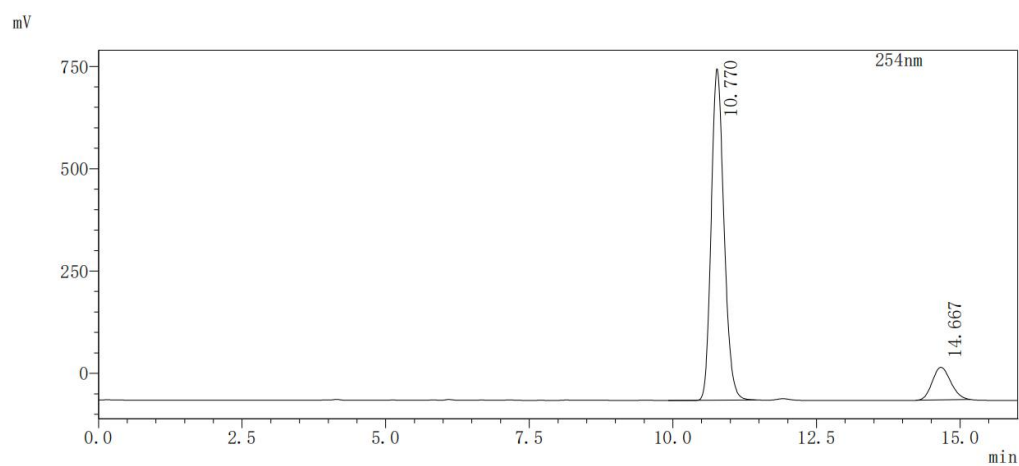

| Peak# | Ret. Time | Area     | Height | Area%   |
|-------|-----------|----------|--------|---------|
| 1     | 10.770    | 12522993 | 809713 | 87.571  |
| 2     | 14.667    | 1777358  | 79600  | 12.429  |
| Total |           | 14300351 | 889313 | 100.000 |

### racemic-3l

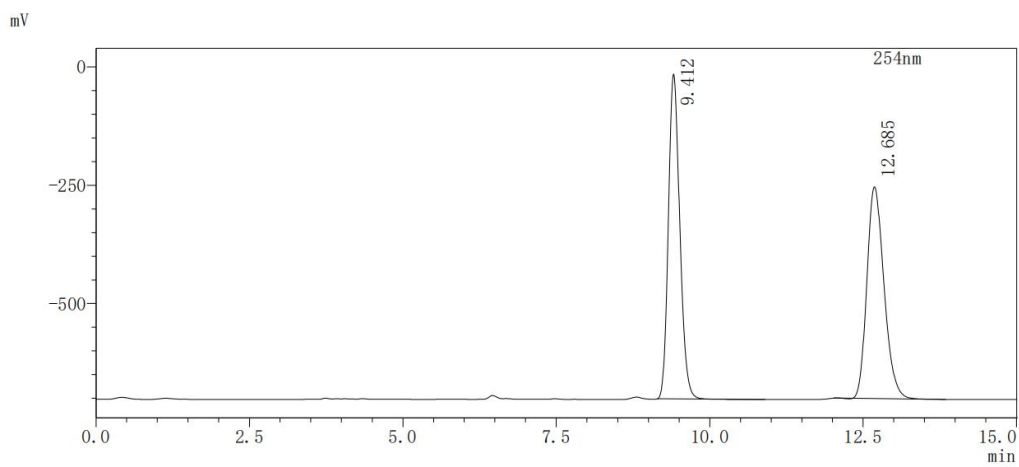

| Peak# | Ret. Time | Area     | Height  | Area%   |
|-------|-----------|----------|---------|---------|
| 1     | 9.412     | 8862778  | 685674  | 50.526  |
| 2     | 12.685    | 8678115  | 447209  | 49.474  |
| Total |           | 17540892 | 1132882 | 100.000 |

### chiral-3l

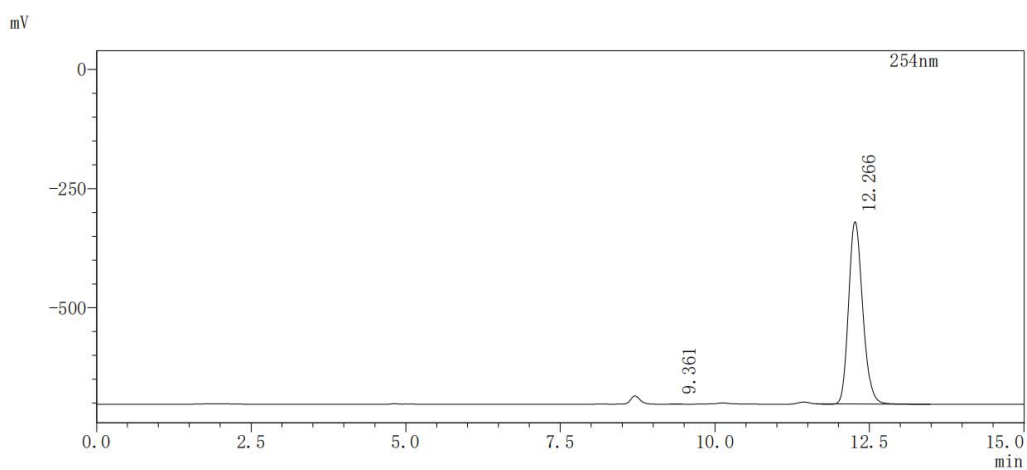

| Peak# | Ret. Time | Area    | Height | Area%   |
|-------|-----------|---------|--------|---------|
| 1     | 9.361     | 1625    | 266    | 0.027   |
| 2     | 12.266    | 6051896 | 382763 | 99.973  |
| Total |           | 6053521 | 383029 | 100.000 |

### racemic-3m

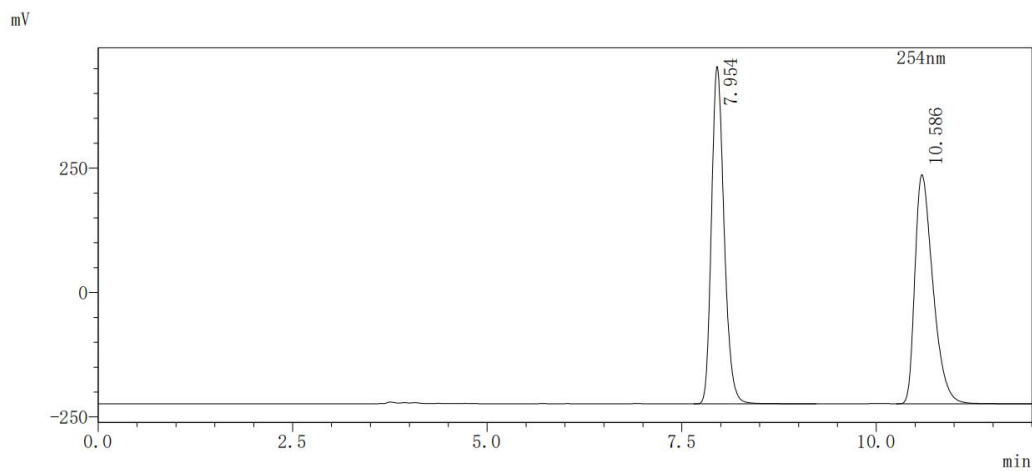

| Peak# | Ret. Time | Area     | Height  | Area%   |
|-------|-----------|----------|---------|---------|
| 1     | 7.954     | 7645148  | 677558  | 50.733  |
| 2     | 10.586    | 7424283  | 460395  | 49.267  |
| Total |           | 15069431 | 1137954 | 100.000 |

### chiral-3m

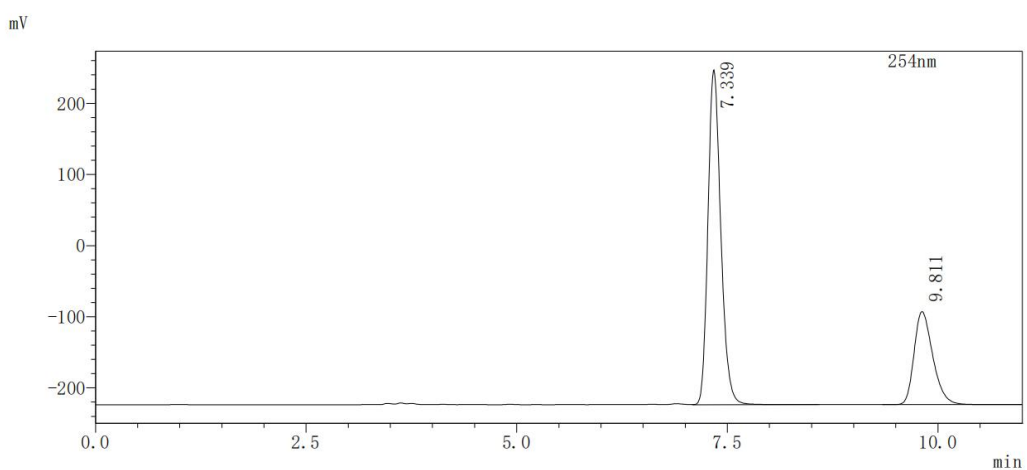

| Peak# | Ret. Time | Area    | Height | Area%   |
|-------|-----------|---------|--------|---------|
| 1     | 7.339     | 4989216 | 470590 | 71.135  |
| 2     | 9.811     | 2024527 | 130814 | 28.865  |
| Total |           | 7013743 | 601404 | 100.000 |

### racemic-3n

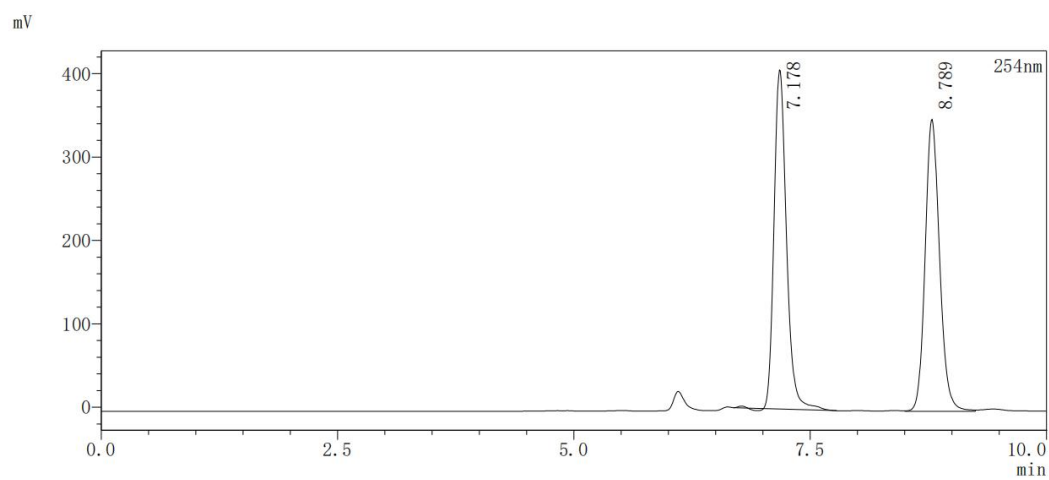

| Peak# | Ret. Time | Area    | Height | Area%   |
|-------|-----------|---------|--------|---------|
| 1     | 7.178     | 3719229 | 406568 | 49.943  |
| 2     | 8.789     | 3727653 | 349980 | 50.057  |
| Total |           | 7446882 | 756548 | 100.000 |

### chiral-3n

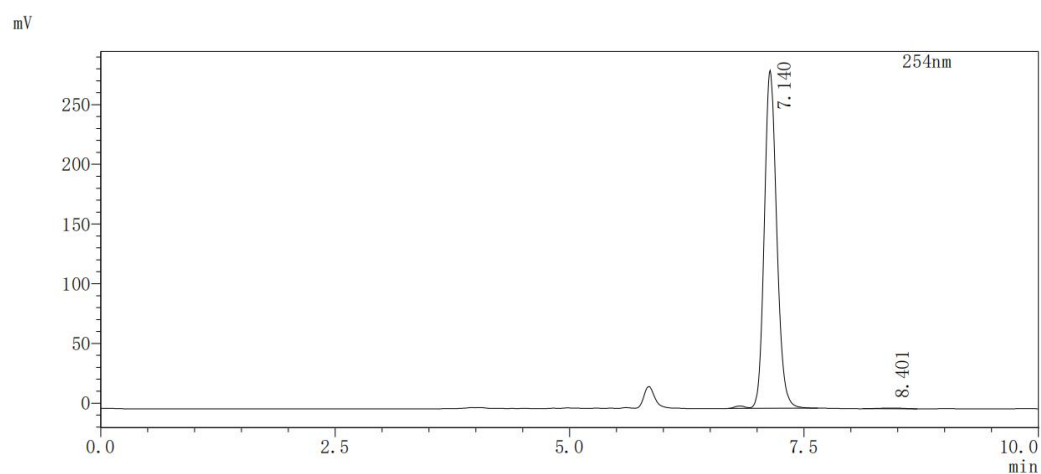

| Peak# | Ret. Time | Area    | Height | Area%   |
|-------|-----------|---------|--------|---------|
| 1     | 7.140     | 2617675 | 283102 | 99.594  |
| 2     | 8.401     | 10682   | 591    | 0.406   |
| Total |           | 2628357 | 283693 | 100.000 |



### racemic-4a

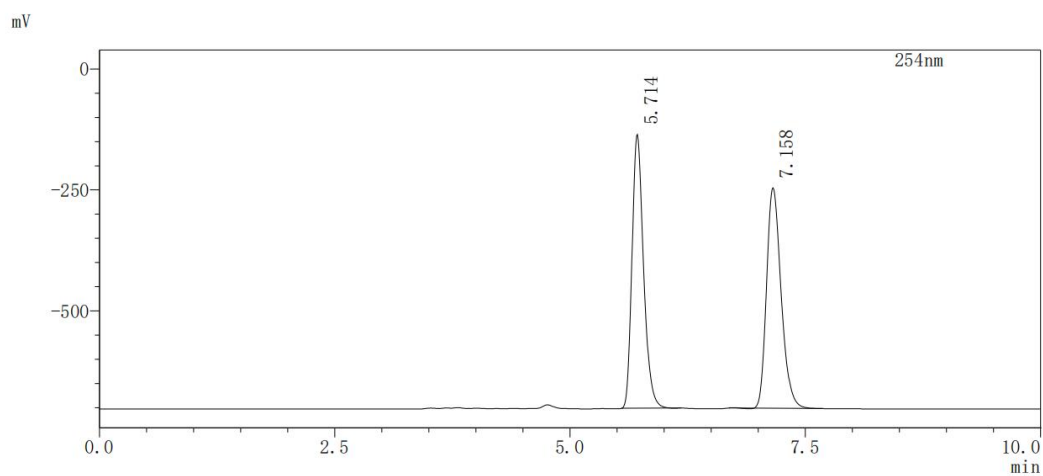

| Peak# | Ret. Time | Area    | Height  | Area%   |
|-------|-----------|---------|---------|---------|
| 1     | 5.714     | 4829622 | 566101  | 49.633  |
| 2     | 7.158     | 4901103 | 455593  | 50.367  |
| Total |           | 9730724 | 1021695 | 100.000 |

### chiral-4a

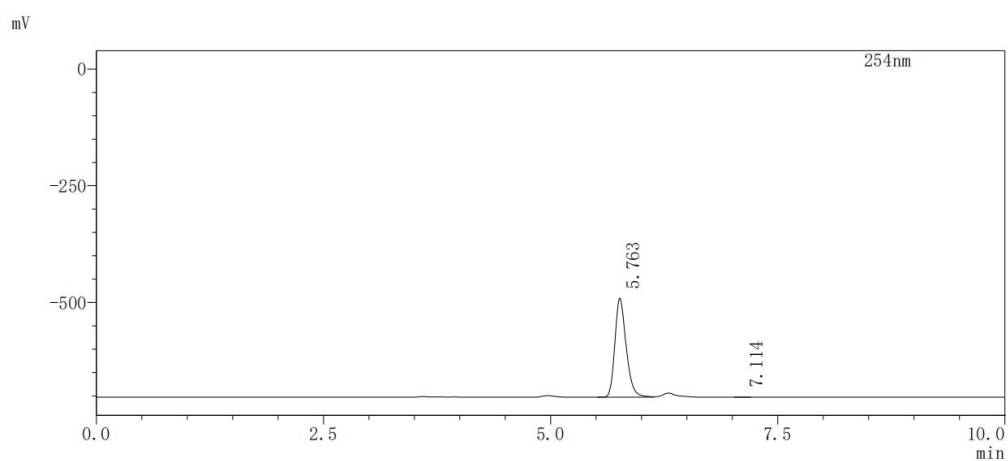

| Peak# | Ret. Time | Area    | Height | Area%   |
|-------|-----------|---------|--------|---------|
| 1     | 5.763     | 1841903 | 211764 | 99.991  |
| 2     | 7.114     | 159     | 30     | 0.009   |
| Total |           | 1842062 | 211793 | 100.000 |

## racemic-4b

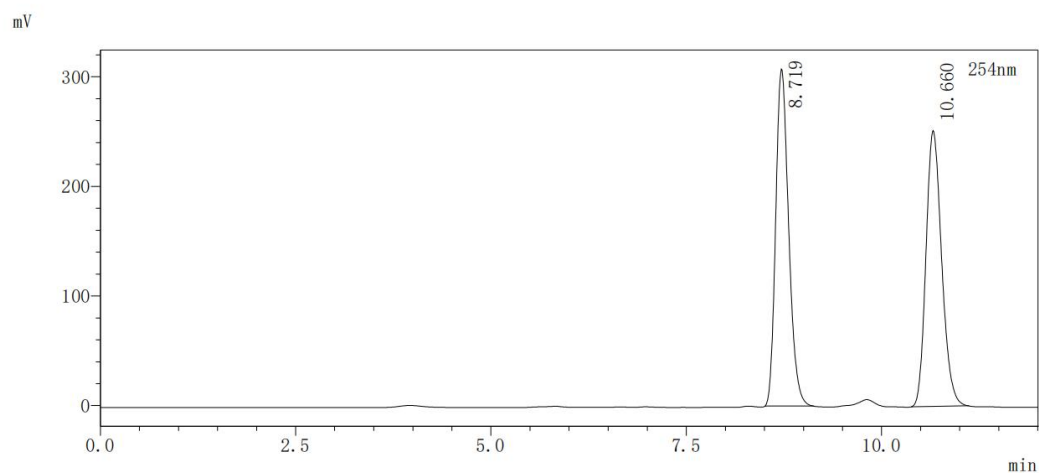

| Peak# | Ret. Time | Area    | Height | Area%   |
|-------|-----------|---------|--------|---------|
| 1     | 8.719     | 3544780 | 307516 | 50.263  |
| 2     | 10.660    | 3507630 | 251673 | 49.737  |
| Total |           | 7052410 | 559189 | 100.000 |

## chiral-4d

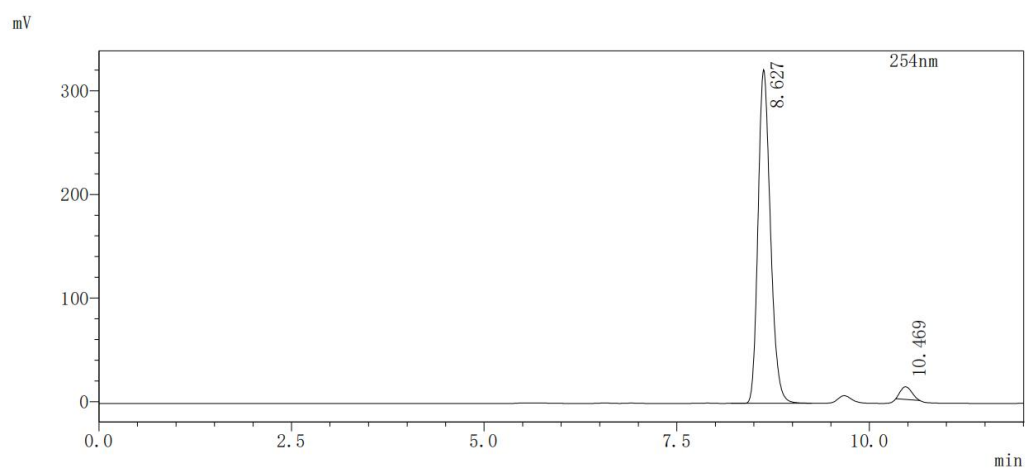

| Peak# | Ret. Time | Area    | Height | Area%   |
|-------|-----------|---------|--------|---------|
| 1     | 8.627     | 3590911 | 322109 | 96.675  |
| 2     | 10.469    | 123517  | 12193  | 3.325   |
| Total |           | 3714428 | 334301 | 100.000 |

### racemic-4c

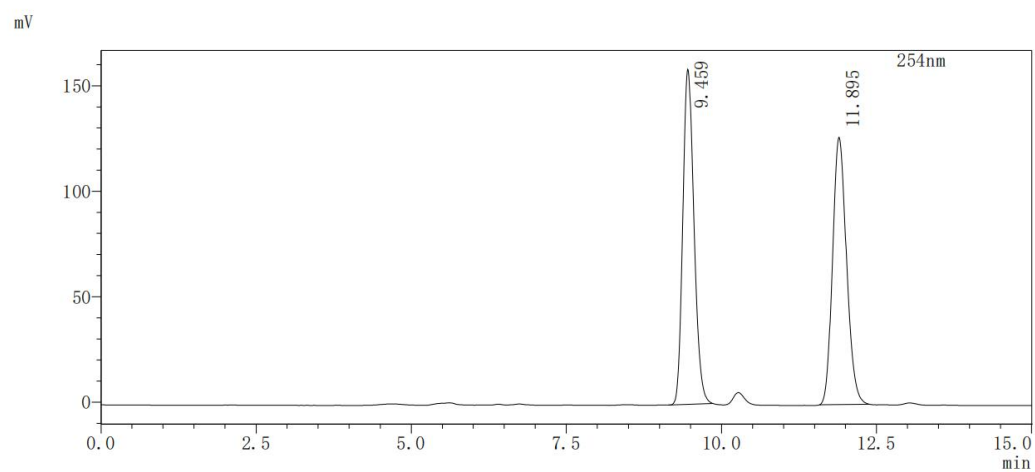

| Peak# | Ret. Time | Area    | Height | Area%   |
|-------|-----------|---------|--------|---------|
| 1     | 9.459     | 1993129 | 158867 | 50.067  |
| 2     | 11.895    | 1987820 | 126617 | 49.933  |
| Total |           | 3980949 | 285484 | 100.000 |

### chiral-4c

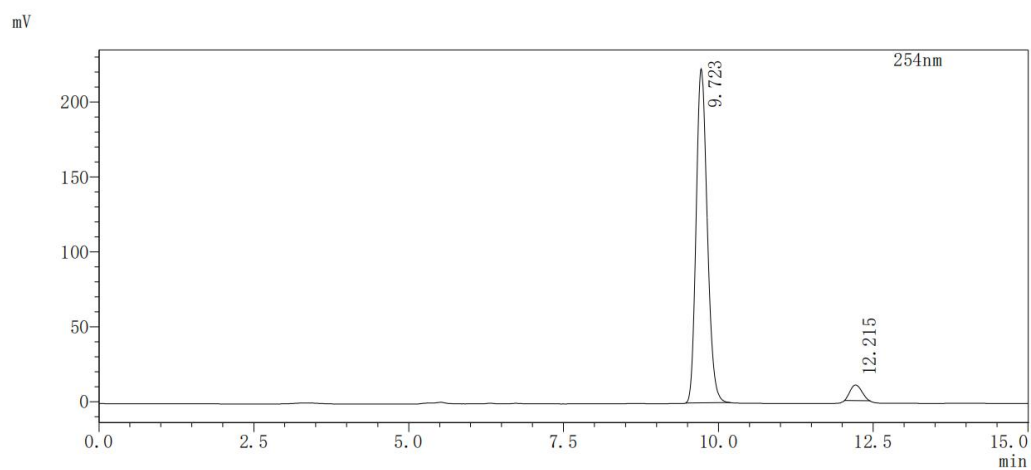

| Peak# | Ret. Time | Area    | Height | Area%   |
|-------|-----------|---------|--------|---------|
| 1     | 9.723     | 2775214 | 223037 | 95.350  |
| 2     | 12.215    | 135327  | 10456  | 4.650   |
| Total |           | 2910541 | 233493 | 100.000 |

## racemic-4d

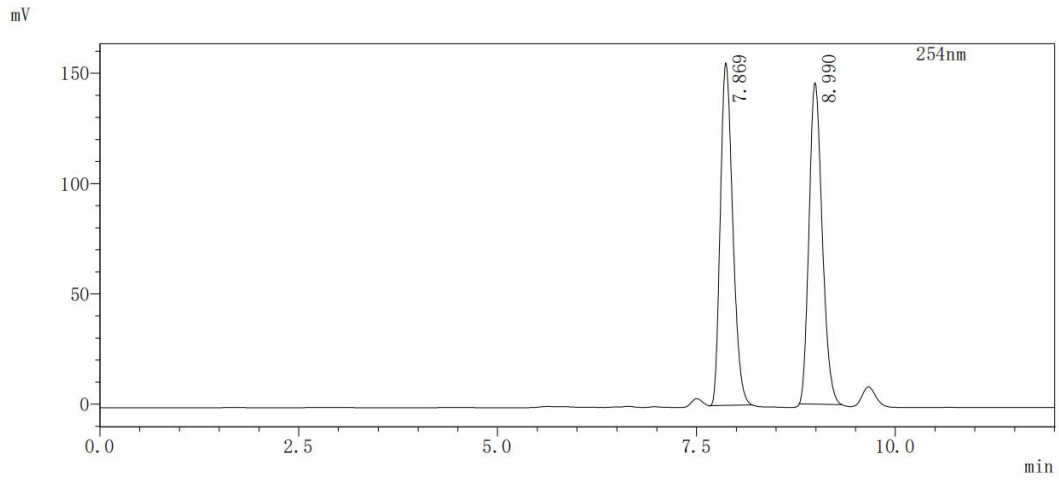

| Peak# | Ret. Time | Area    | Height | Area%   |
|-------|-----------|---------|--------|---------|
| 1     | 7.869     | 1684906 | 155204 | 50.066  |
| 2     | 8.990     | 1680496 | 145650 | 49.934  |
| Total |           | 3365402 | 300854 | 100.000 |

## chiral-4d

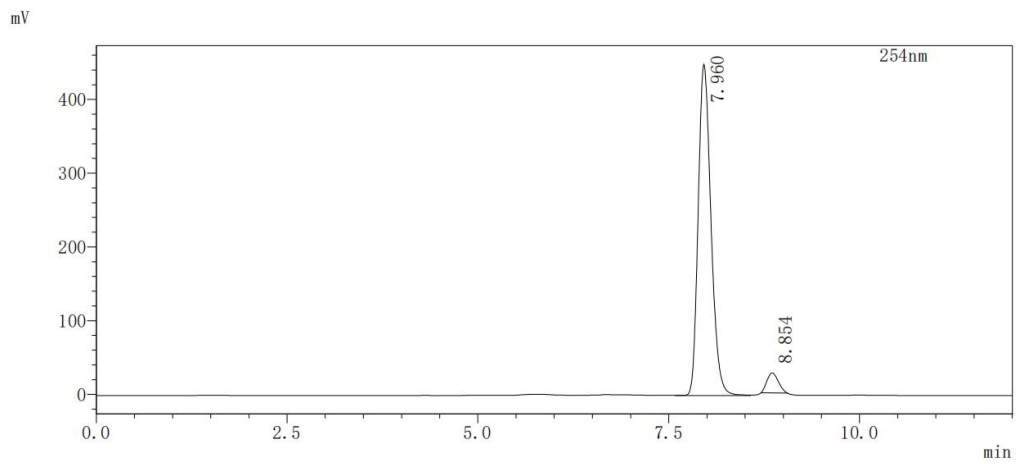

| Peak# | Ret. Time | Area    | Height | Area%   |
|-------|-----------|---------|--------|---------|
| 1     | 7.960     | 5231858 | 449260 | 94.944  |
| 2     | 8.854     | 278605  | 26874  | 5.056   |
| Total |           | 5510463 | 476133 | 100.000 |

### racemic-4e

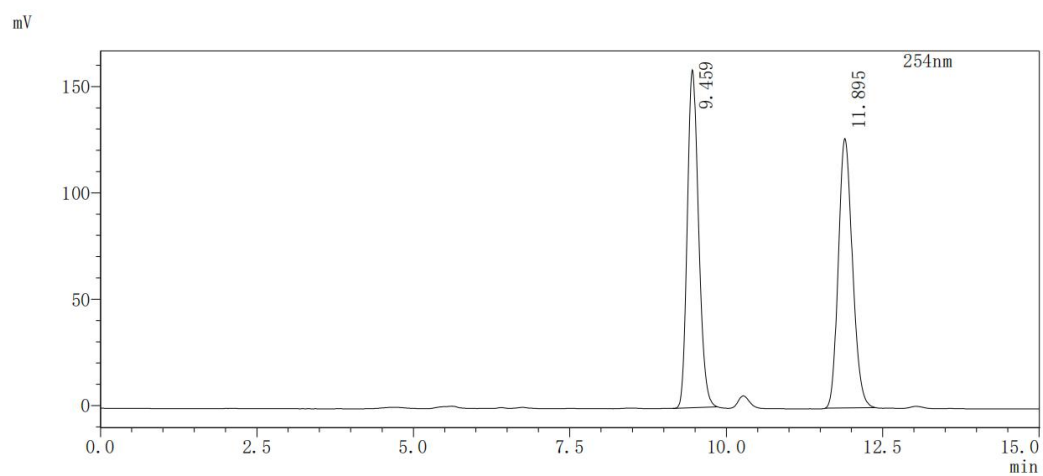

| Peak# | Ret. Time | Area    | Height | Area%   |
|-------|-----------|---------|--------|---------|
| 1     | 9.459     | 1993129 | 158867 | 50.067  |
| 2     | 11.895    | 1987820 | 126617 | 49.933  |
| Total |           | 3980949 | 285484 | 100.000 |

### chiral-4e

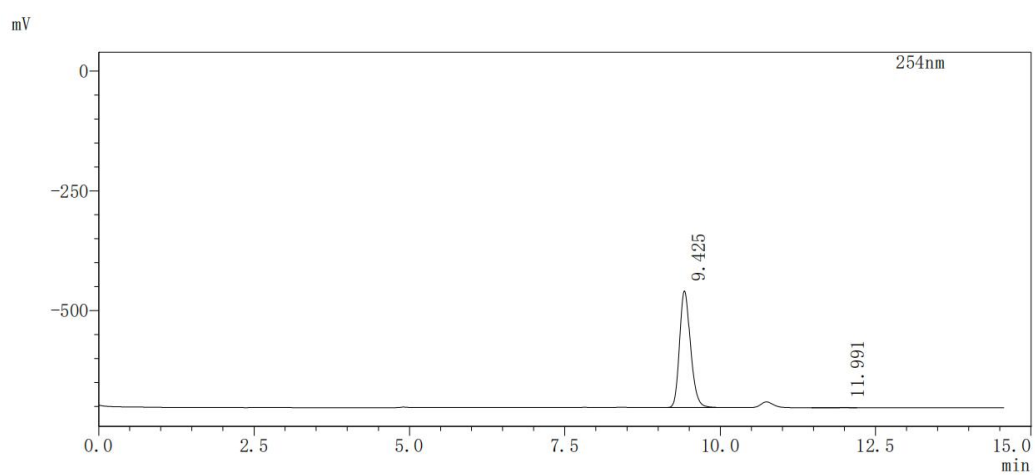

| Peak# | Ret. Time | Area    | Height | Area%   |
|-------|-----------|---------|--------|---------|
| 1     | 9.425     | 2995646 | 243309 | 99.974  |
| 2     | 11.991    | 778     | 179    | 0.026   |
| Total |           | 2996423 | 243488 | 100.000 |

## racemic-4f

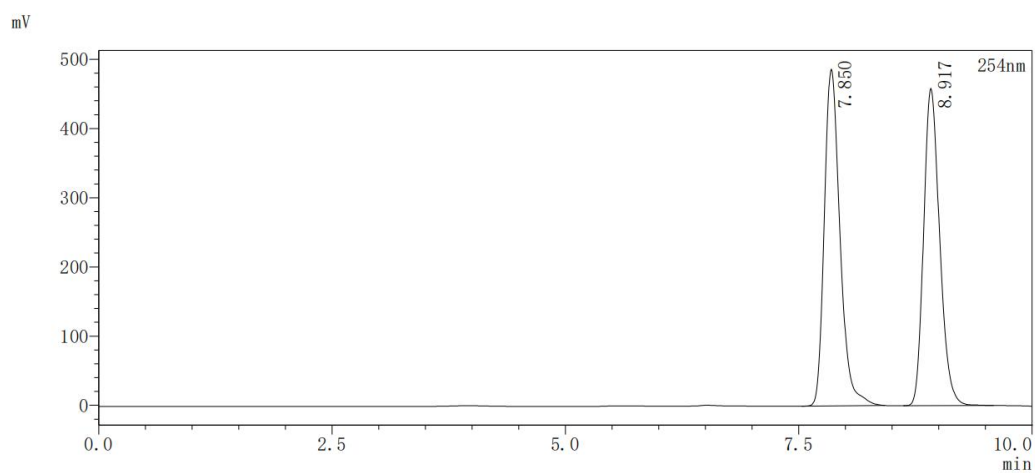

| Peak# | Ret. Time | Area     | Height | Area%   |
|-------|-----------|----------|--------|---------|
| 1     | 7.850     | 5692783  | 486555 | 50.974  |
| 2     | 8.917     | 5475241  | 458407 | 49.026  |
| Total |           | 11168024 | 944962 | 100.000 |

## chiral-4f

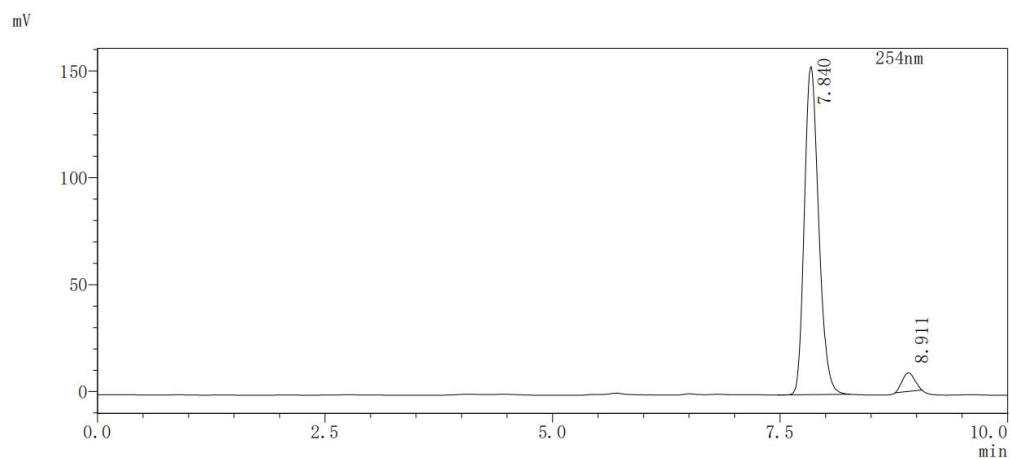

| Peak# | Ret. Time | Area    | Height | Area%   |
|-------|-----------|---------|--------|---------|
| 1     | 7.840     | 1676152 | 133356 | 95.350  |
| 2     | 8.911     | 81746   | 8666   | 4.650   |
| Total |           | 1757899 | 162022 | 100.000 |

## racemic-4g

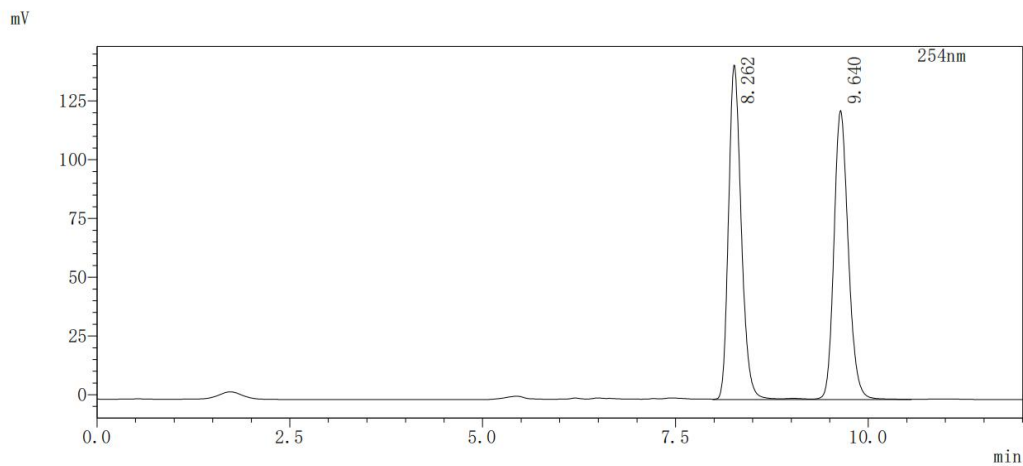

| Peak# | Ret. Time | Area    | Height | Area%   |
|-------|-----------|---------|--------|---------|
| 1     | 8.262     | 1640413 | 142278 | 50.734  |
| 2     | 9.640     | 1592925 | 122968 | 49.266  |
| Total |           | 3233337 | 265246 | 100.000 |

## chiral-4g

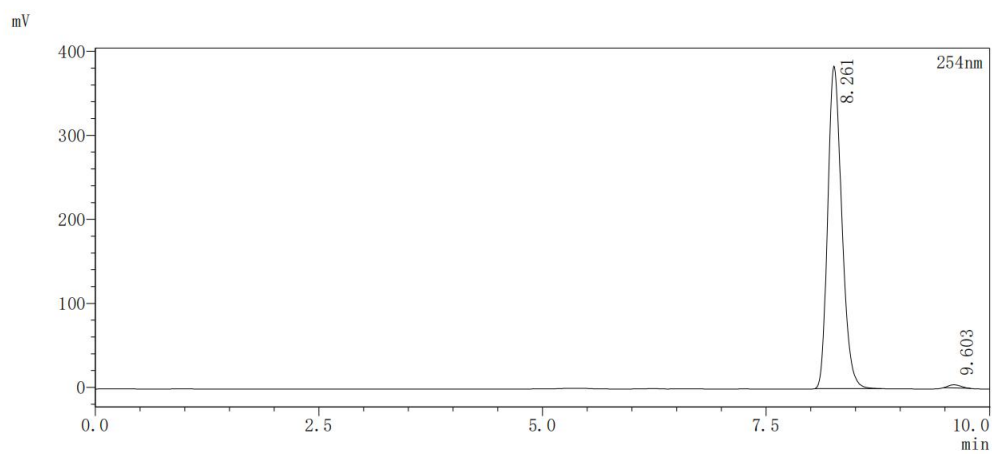

| Peak# | Ret. Time | Area    | Height | Area%   |
|-------|-----------|---------|--------|---------|
| 1     | 8.261     | 4202106 | 383750 | 99.184  |
| 2     | 9.603     | 34589   | 3690   | 0.816   |
| Total |           | 4236695 | 387440 | 100.000 |

## racemic-4h

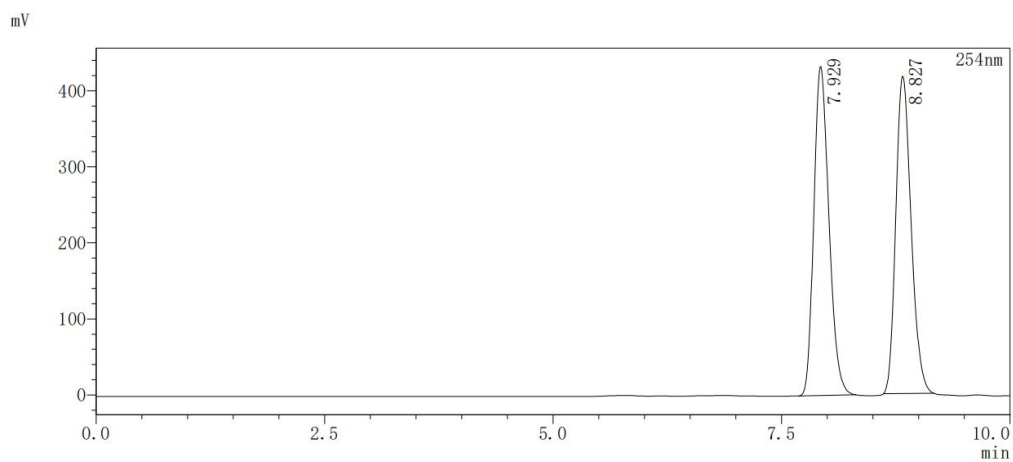

| Peak# | Ret. Time | Area    | Height | Area%   |
|-------|-----------|---------|--------|---------|
| 1     | 7.929     | 4979137 | 432596 | 50.591  |
| 2     | 8.827     | 4862724 | 417229 | 49.409  |
| Total |           | 9841861 | 849825 | 100.000 |

## chiral-4h

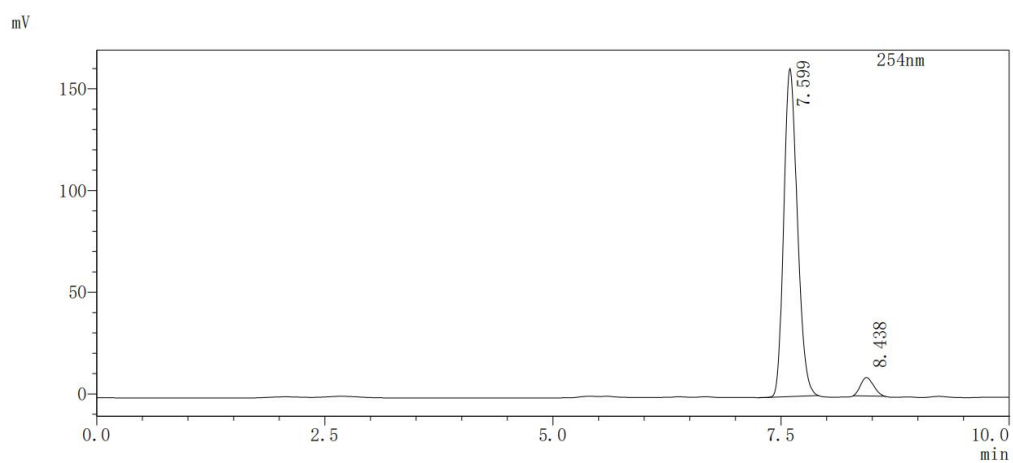

| Peak# | Ret. Time | Area    | Height | Area%   |
|-------|-----------|---------|--------|---------|
| 1     | 7.599     | 1674841 | 161271 | 94.870  |
| 2     | 8.438     | 90568   | 9094   | 5.130   |
| Total |           | 1765409 | 170366 | 100.000 |



## racemic-4i

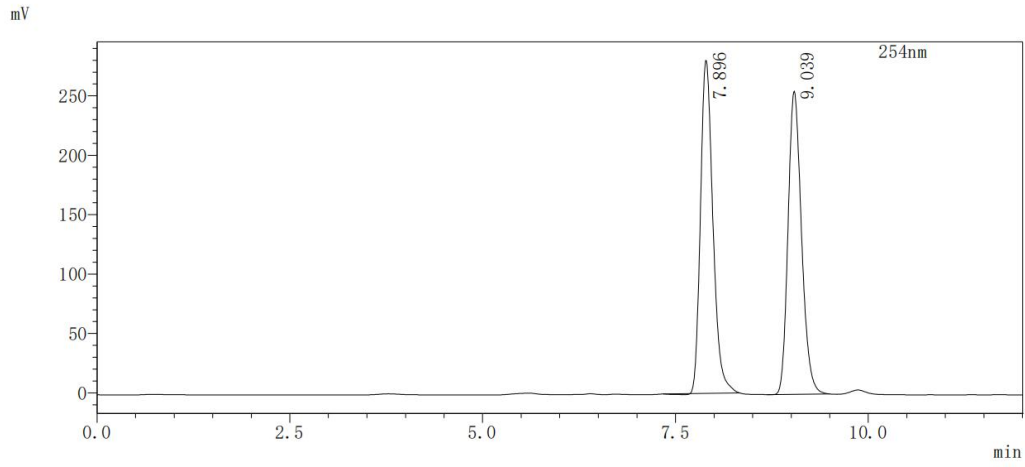

| Peak# | Ret. Time | Area    | Height | Area%   |
|-------|-----------|---------|--------|---------|
| 1     | 7.896     | 3141610 | 280133 | 50.344  |
| 2     | 9.039     | 3098655 | 255074 | 49.656  |
| Total |           | 6240264 | 535208 | 100.000 |

## chiral-4i

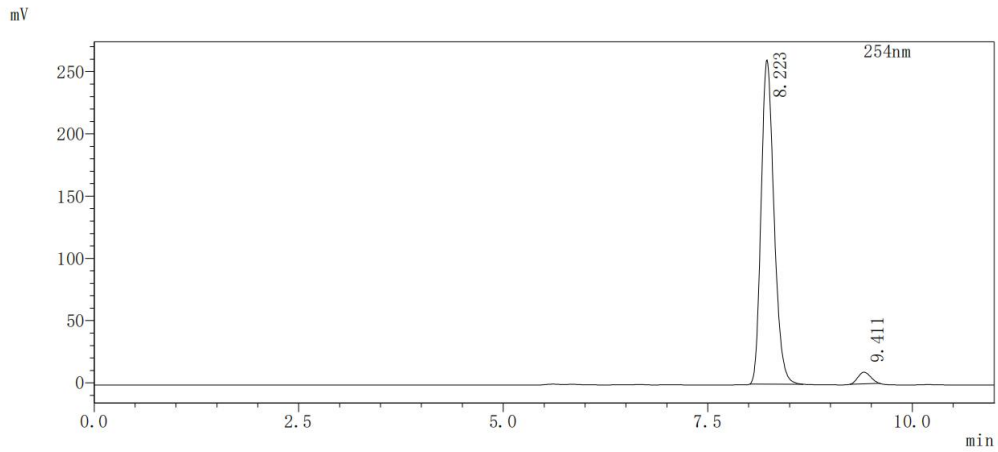

| Peak# | Ret. Time | Area    | Height | Area%   |
|-------|-----------|---------|--------|---------|
| 1     | 8.223     | 2850008 | 260388 | 96.612  |
| 2     | 9.411     | 99957   | 9305   | 3.388   |
| Total |           | 2949965 | 269693 | 100.000 |

### racemic-4j

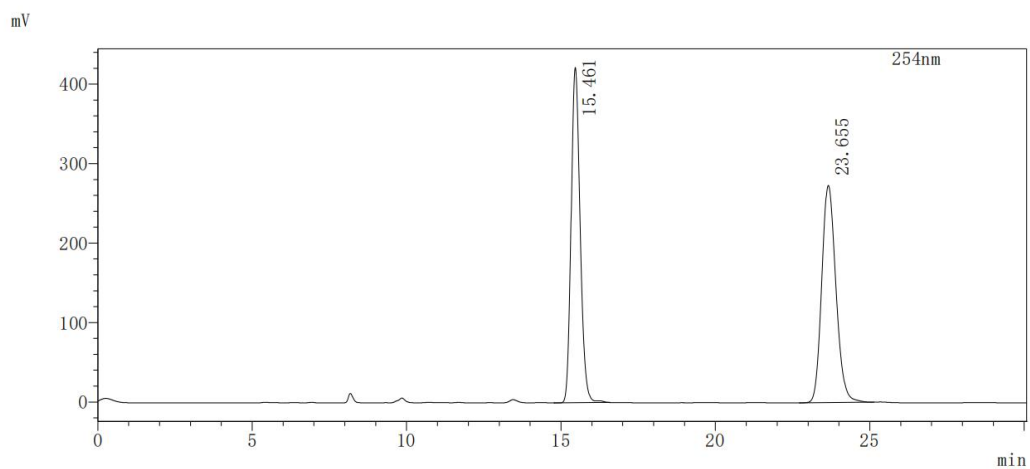

| Peak# | Ret. Time | Area     | Height | Area%   |
|-------|-----------|----------|--------|---------|
| 1     | 15.461    | 8546259  | 421746 | 49.449  |
| 2     | 23.655    | 8736741  | 273404 | 50.551  |
| Total |           | 17282999 | 695151 | 100.000 |

c

### hiral-4j

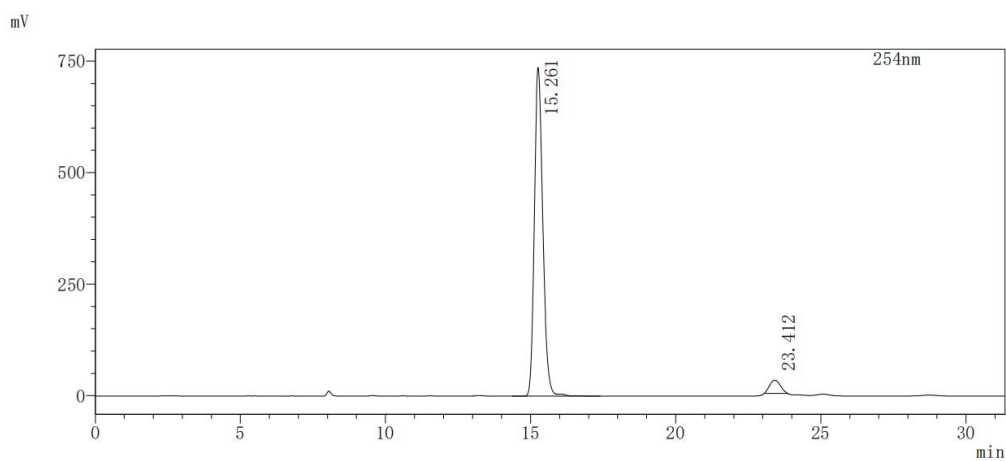

| Peak# | Ret. Time | Area     | Height | Area%   |
|-------|-----------|----------|--------|---------|
| 1     | 15.261    | 14881934 | 736543 | 95.162  |
| 2     | 23.412    | 756603   | 29540  | 4.838   |
| Total |           | 15638537 | 766083 | 100.000 |

## racemic-4k

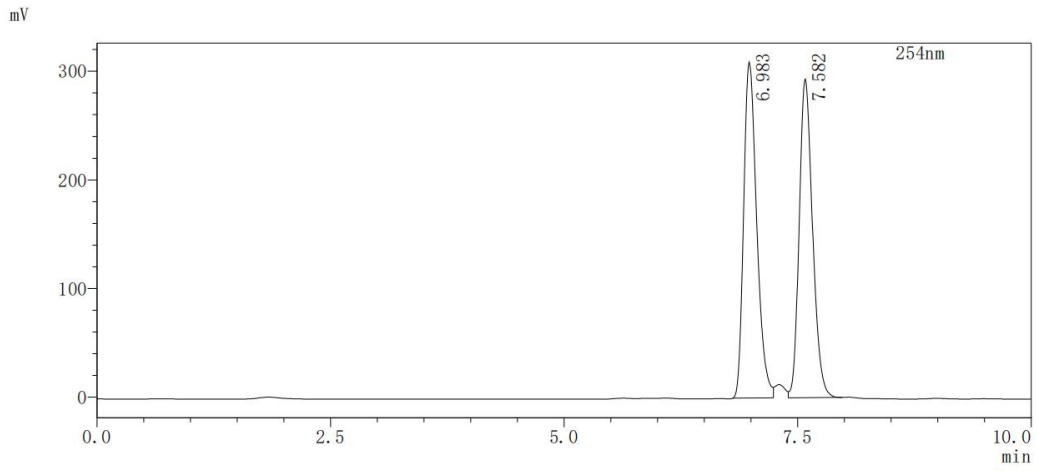

| Peak# | Ret. Time | Area    | Height | Area%   |
|-------|-----------|---------|--------|---------|
| 1     | 6.983     | 3007296 | 309437 | 50.700  |
| 2     | 7.582     | 2924232 | 293390 | 49.300  |
| Total |           | 5931528 | 602827 | 100.000 |

## chiral-4k

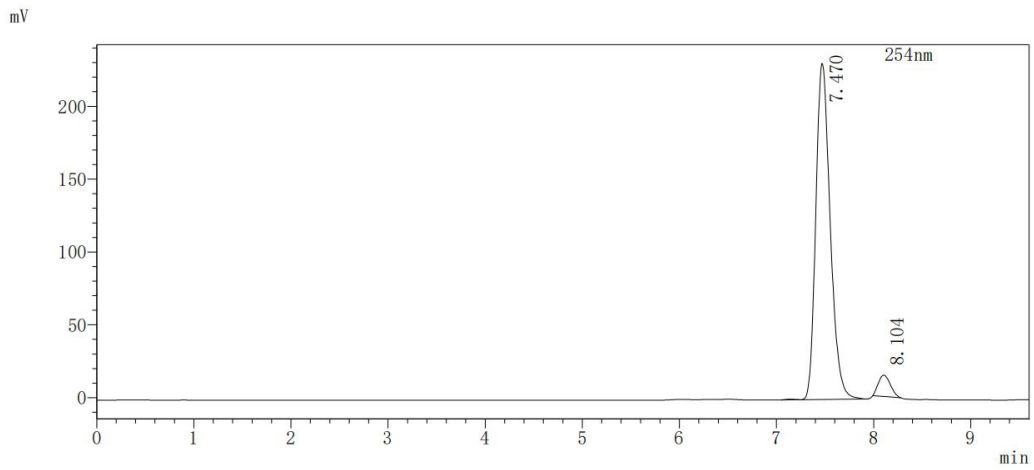

| Peak# | Ret. Time | Area    | Height | Area%   |
|-------|-----------|---------|--------|---------|
| 1     | 7.470     | 2379971 | 230607 | 94.991  |
| 2     | 8.104     | 125489  | 14531  | 5.009   |
| Total |           | 2505460 | 245137 | 100.000 |

## racemic-4l

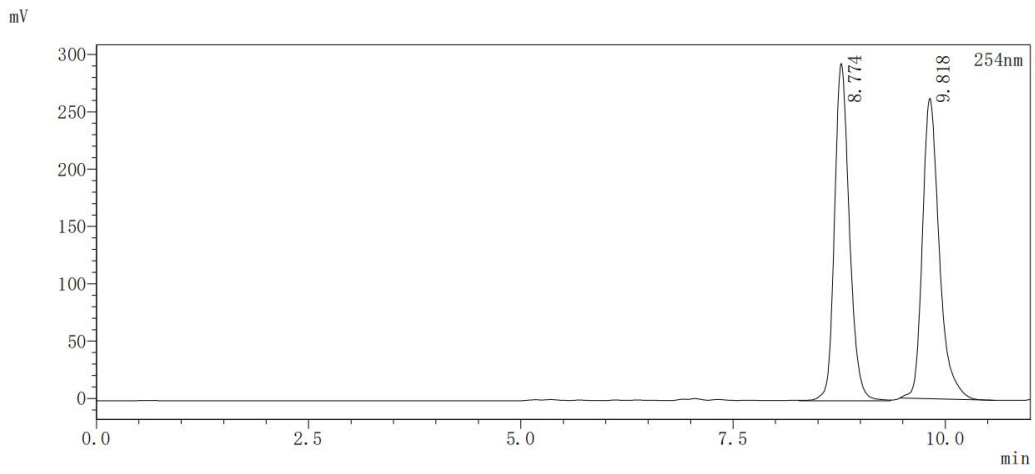

| Peak# | Ret. Time | Area    | Height | Area%   |
|-------|-----------|---------|--------|---------|
| 1     | 8.774     | 3596258 | 294026 | 49.877  |
| 2     | 9.818     | 3613960 | 261958 | 50.123  |
| Total |           | 7210218 | 555984 | 100.000 |

## chiral-4l

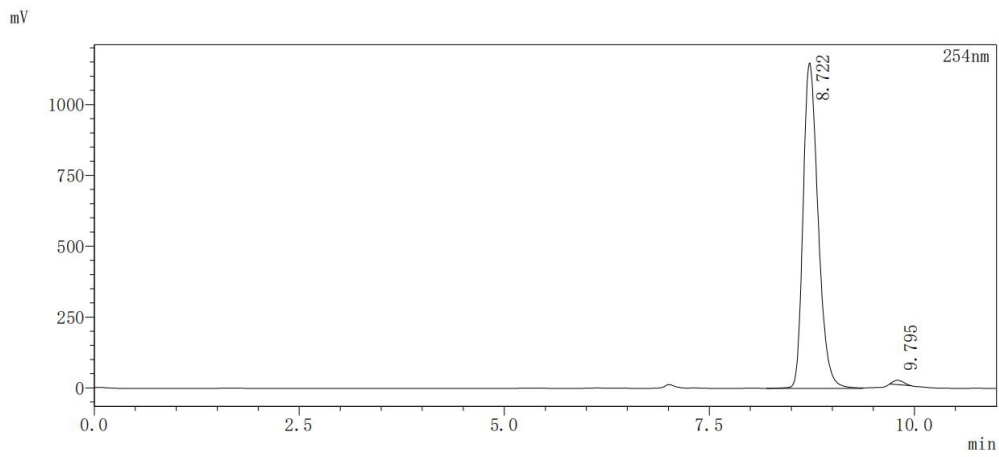

| Peak# | Ret. Time | Area     | Height  | Area%   |
|-------|-----------|----------|---------|---------|
| 1     | 8.722     | 14666368 | 1148954 | 99.093  |
| 2     | 9.795     | 134275   | 15359   | 0.907   |
| Total |           | 14800643 | 1164314 | 100.000 |

### racemic-4m

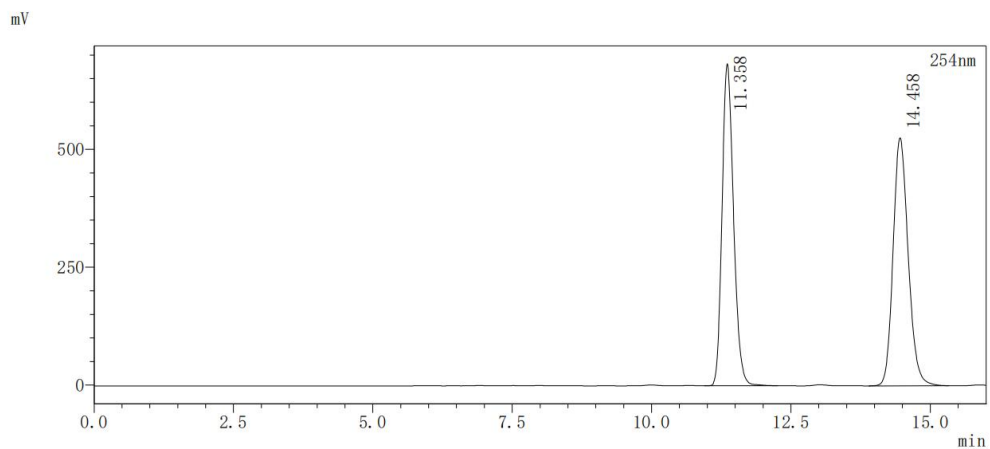

| Peak# | Ret. Time | Area     | Height  | Area%   |
|-------|-----------|----------|---------|---------|
| 1     | 11.358    | 9793540  | 682695  | 49.689  |
| 2     | 14.458    | 9916315  | 526082  | 50.311  |
| Total |           | 19709855 | 1208778 | 100.000 |

### chiral-4m

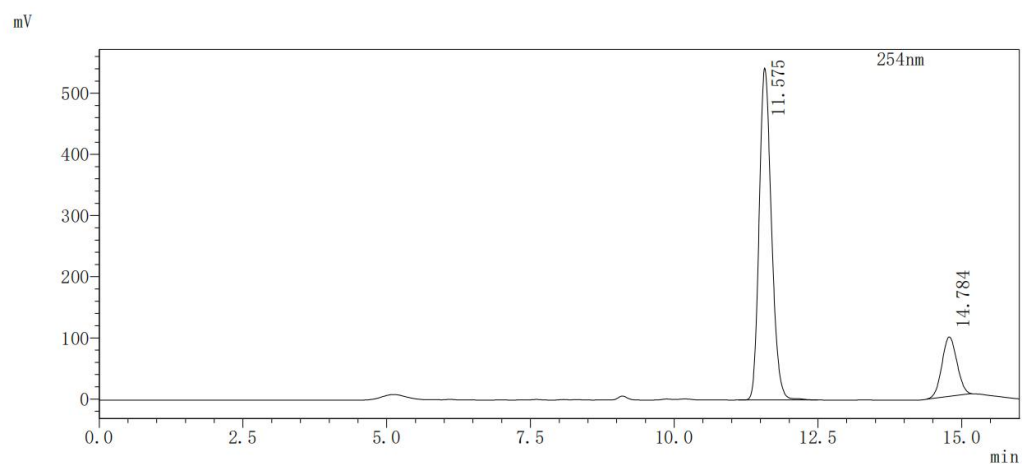

| Peak# | Ret. Time | Area    | Height | Area%   |
|-------|-----------|---------|--------|---------|
| 1     | 11.575    | 8054239 | 542802 | 82.097  |
| 2     | 14.784    | 1756424 | 97073  | 17.903  |
| Total |           | 9810662 | 639876 | 100.000 |

## racemic-4n

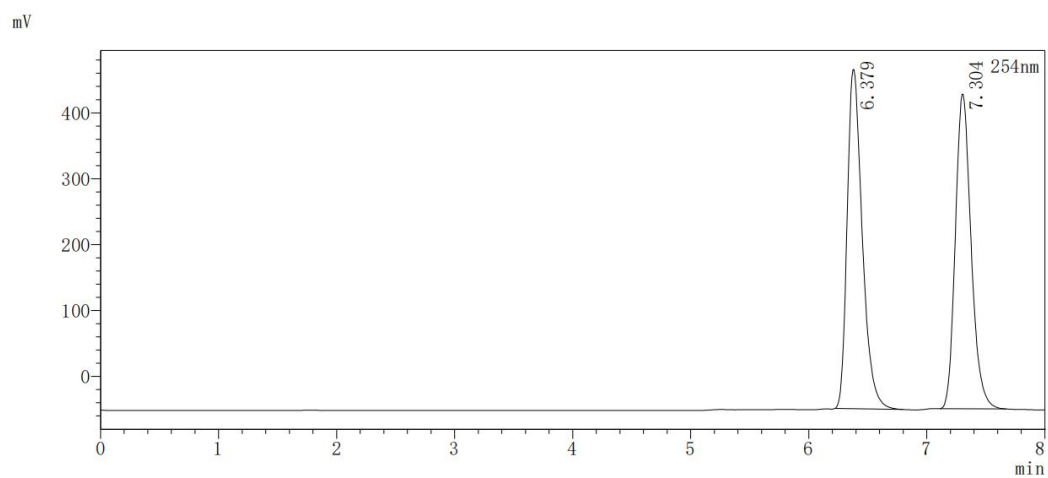

254nm

| Peak# | Ret. Time | Area    | Height | Area%   |
|-------|-----------|---------|--------|---------|
| 1     | 6.379     | 4569228 | 514357 | 50.772  |
| 2     | 7.304     | 4430241 | 477287 | 49.228  |
| Total |           | 8999469 | 991644 | 100.000 |

## chiral-4n

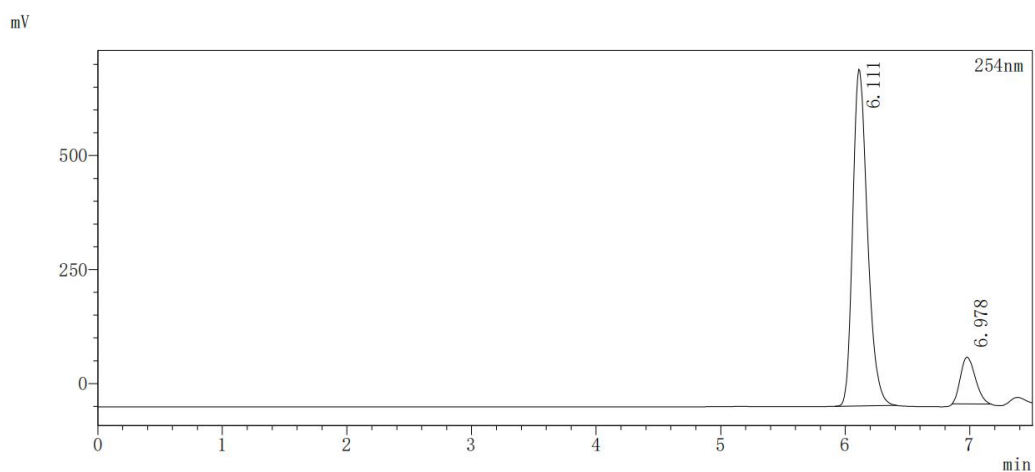

254nm

| Peak# | Ret. Time | Area    | Height | Area%   |
|-------|-----------|---------|--------|---------|
| 1     | 6.111     | 6076777 | 738491 | 87.692  |
| 2     | 6.978     | 852895  | 102700 | 12.308  |
| Total |           | 6929672 | 841191 | 100.000 |

## racemic-4o

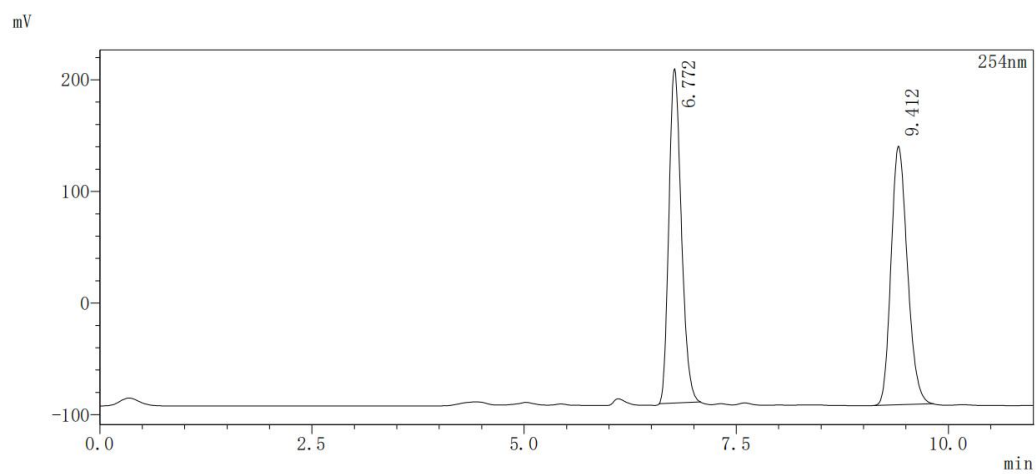

| Peak# | Ret. Time | Area    | Height | Area%   |
|-------|-----------|---------|--------|---------|
| 1     | 6.772     | 3054865 | 299355 | 49.598  |
| 2     | 9.412     | 3104416 | 231453 | 50.402  |
| Total |           | 6159281 | 530808 | 100.000 |

## chiral-4o

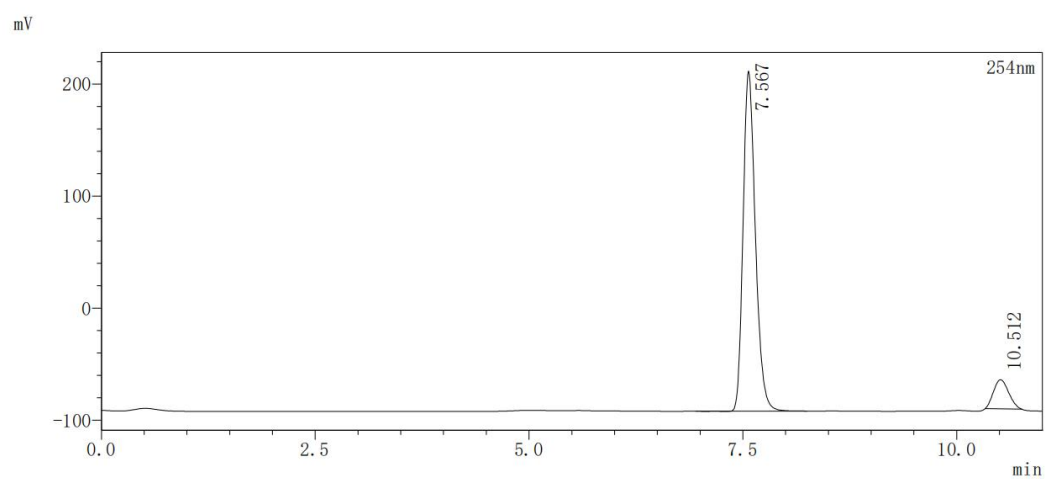

| Peak# | Ret. Time | Area    | Height | Area%   |
|-------|-----------|---------|--------|---------|
| 1     | 7.567     | 3034315 | 303068 | 90.476  |
| 2     | 10.512    | 319398  | 25972  | 9.524   |
| Total |           | 3353713 | 329041 | 100.000 |

### racemic-4p

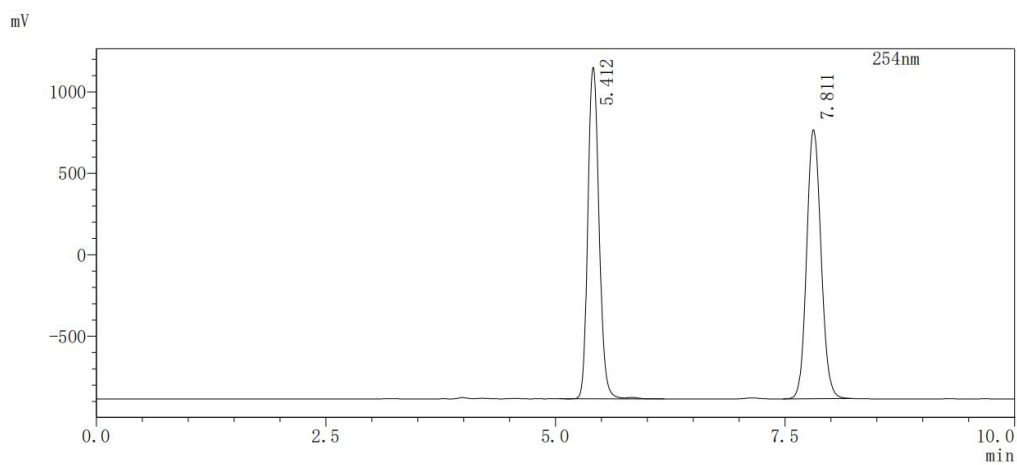

| Peak# | Ret. Time | Area     | Height  | Area%   |
|-------|-----------|----------|---------|---------|
| 1     | 5.412     | 17361434 | 2034474 | 49.109  |
| 2     | 7.811     | 17991660 | 1651747 | 50.891  |
| Total |           | 35353094 | 3686220 | 100.000 |

**c**

### hiral-4p

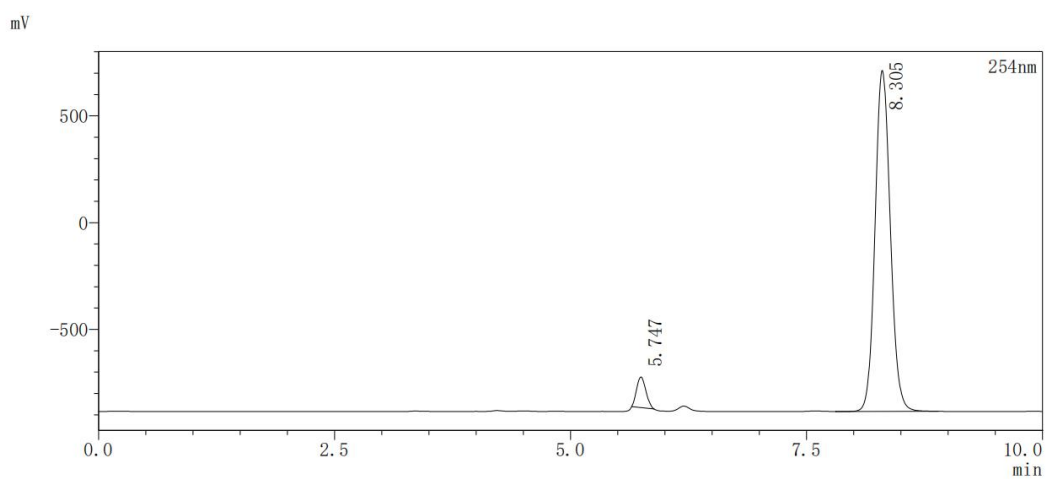

| Peak# | Ret. Time | Area     | Height  | Area%   |
|-------|-----------|----------|---------|---------|
| 1     | 5.747     | 979644   | 143099  | 5.167   |
| 2     | 8.305     | 17979243 | 1596424 | 94.833  |
| Total |           | 18958887 | 1739522 | 100.000 |



## racemic-5a

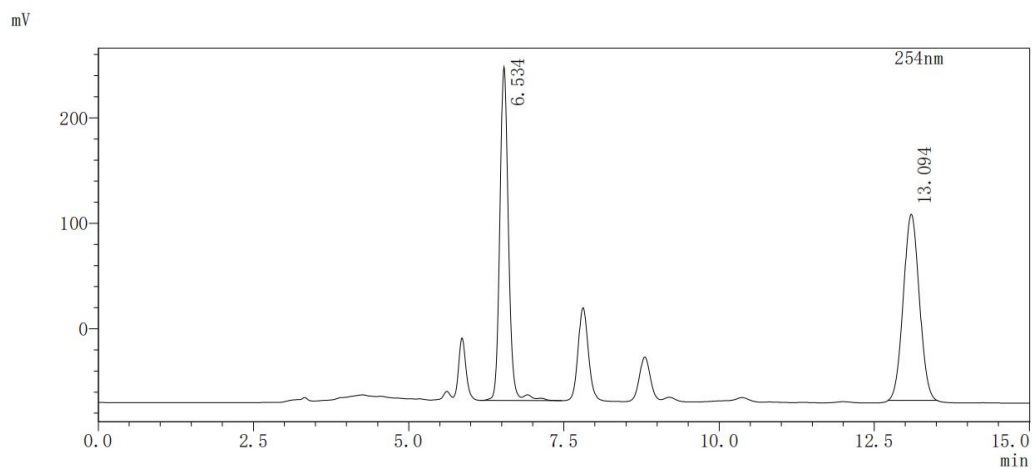

| Peak# | Ret. Time | Area    | Height | Area%   |
|-------|-----------|---------|--------|---------|
| 1     | 6.534     | 3048010 | 316246 | 49.030  |
| 2     | 13.094    | 3168613 | 176432 | 50.970  |
| Total |           | 6216623 | 492677 | 100.000 |

## chiral-5a

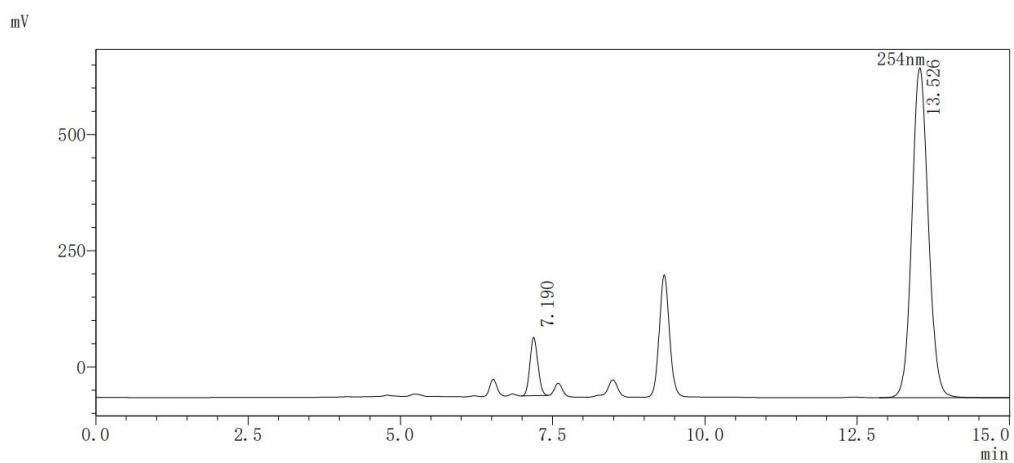

| Peak# | Ret. Time | Area     | Height | Area%   |
|-------|-----------|----------|--------|---------|
| 1     | 7.190     | 1146471  | 125763 | 7.935   |
| 2     | 13.526    | 13301874 | 710114 | 92.065  |
| Total |           | 14448345 | 835877 | 100.000 |

### racemic-6a

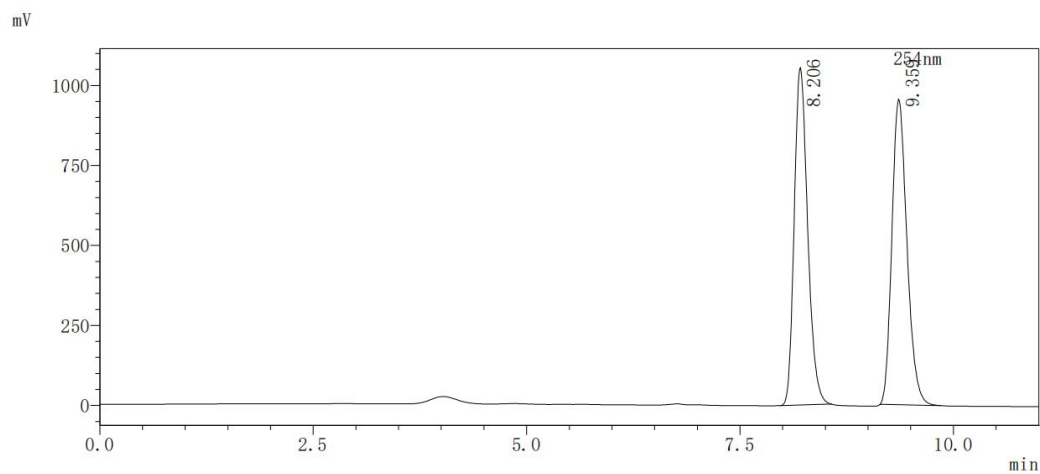

| Peak# | Ret. Time | Area     | Height  | Area%   |
|-------|-----------|----------|---------|---------|
| 1     | 8.206     | 11524420 | 1054584 | 49.638  |
| 2     | 9.359     | 11692536 | 954462  | 50.362  |
| Total |           | 23216955 | 2009046 | 100.000 |

### chiral-6a

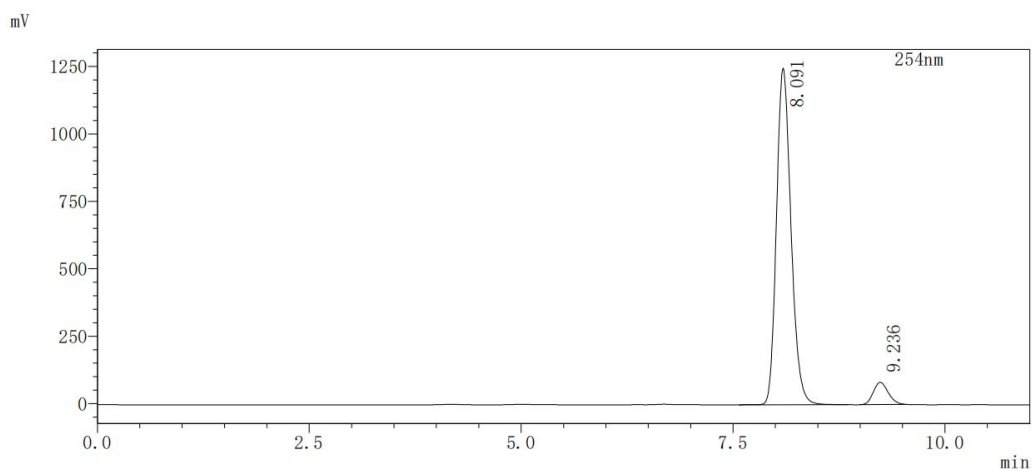

| Peak# | Ret. Time | Area     | Height  | Area%   |
|-------|-----------|----------|---------|---------|
| 1     | 8.091     | 14894845 | 1247881 | 93.685  |
| 2     | 9.236     | 1003987  | 82461   | 6.315   |
| Total |           | 15898831 | 1330342 | 100.000 |

## IX Single Crystal X-Ray Diffraction of 4a

Crystal data and structure refinement for **4a**. The method for crystal growth: mixture of Petroleum ether and ethyl acetate, at room temperature. X-ray derived ORTEP of **4a** with thermal ellipsoids shown at the 35% probability level.

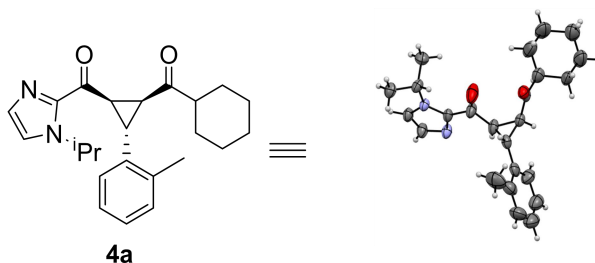

CCDC: 2378265

|                                   |                                                               |                  |
|-----------------------------------|---------------------------------------------------------------|------------------|
| Identification code               | <b>4a</b>                                                     |                  |
| Empirical formula                 | C <sub>24</sub> H <sub>30</sub> N <sub>2</sub> O <sub>2</sub> |                  |
| Formula weight                    | 378.50                                                        |                  |
| Temperature                       | 173.0 K                                                       |                  |
| Wavelength                        | 1.54178 Å                                                     |                  |
| Crystal system                    | Monoclinic                                                    |                  |
| Space group                       | P 1 21 1                                                      |                  |
| Unit cell dimensions              | a = 10.483(2) Å                                               | a = 90°          |
|                                   | b = 9.2579(13) Å                                              | b = 112.815(13)° |
|                                   | c = 12.006(2) Å                                               | g = 90°          |
| Volume                            | 1074.0(3) Å <sup>3</sup>                                      |                  |
| Z                                 | 2                                                             |                  |
| Density (calculated)              | 1.170 Mg/m <sup>3</sup>                                       |                  |
| Absorption coefficient            | 0.583 mm <sup>-1</sup>                                        |                  |
| F(000)                            | 408                                                           |                  |
| Crystal size                      | 0.17 x 0.09 x 0.07 mm <sup>3</sup>                            |                  |
| Theta range for data collection   | 3.994 to 72.228°                                              |                  |
| Index ranges                      | -10 ≤ h ≤ 12, -11 ≤ k ≤ 11, -14 ≤ l ≤ 14                      |                  |
| Reflections collected             | 11154                                                         |                  |
| Independent reflections           | 4065 [R(int) = 0.0947]                                        |                  |
| Completeness to theta = 67.679°   | 99.8 %                                                        |                  |
| Absorption correction             | Semi-empirical from equivalents                               |                  |
| Max. and min. transmission        | 0.7536 and 0.5954                                             |                  |
| Refinement method                 | Full-matrix least-squares on F <sup>2</sup>                   |                  |
| Data / restraints / parameters    | 4065 / 19 / 245                                               |                  |
| Goodness-of-fit on F <sup>2</sup> | 1.090                                                         |                  |
| Final R indices [I > 2σ(I)]       | R1 = 0.0704, wR2 = 0.1832                                     |                  |

|                              |                                    |
|------------------------------|------------------------------------|
| R indices (all data)         | R1 = 0.1206, wR2 = 0.2112          |
| Absolute structure parameter | 0.0(8)                             |
| Extinction coefficient       | n/a                                |
| Largest diff. peak and hole  | 0.427 and -0.295 e.Å <sup>-3</sup> |

## X References

- (1) W. Li, X.-H. Liu, X.-Y. Hao, Y.-F. Cai, L.-L. Lin, X.-M. Feng, A Catalytic Asymmetric Ring-Expansion Reaction of Isatins and  $\alpha$ -Alkyl- $\alpha$ -Diazoesters: Highly Efficient Synthesis of Functionalized 2-Quinolone Derivatives. *Angew. Chem.* 2012, **124**, 8772-8775.
- (2) X.-H. L.-L. Liu, Lin, X.-M. Feng, Chiral *N,N*-dioxide ligands: synthesis, coordination chemistry and asymmetric catalysis. *Org. Chem. Front.* 2014, **1**, 298-302.
- (3) R.-M. Liu, Y.-H. Wang, Z.-Y. Chen, L. Zhang, Q.-H. Shi, Y. Zhou, Y.-P. Tian, X.-L. Liu, New tertiary amine-derived C<sub>2</sub>-symmetric chiral pyridine-*N,N'*-dioxide ligands and their applications in asymmetric catalysis. *Org. Chem. Front.* 2022, **9**, 6881-6887; (b) Z.-Y. Chen, P. Hu, X.-R. Wang, K.-L. Xu, Y.-H. Wang, Y.-P. Tian, Y. Zhou, X.-L. Liu, Design and Synthesis of Rigid-Featured Tertiary Amine Derived C<sub>2</sub>-Symmetric Chiral Furan-*N,N'*-dioxide Ligands. *Eur. J. Org. Chem.* 2023, **26**, e202300764.
- (4) X. Gao, C.-W. Li, L. Chen, X. Li, Asymmetric Synthesis of Axially Chiral Arylpyrazole via an Organocatalytic Arylation Reaction. *Org. Lett.* 2023, **25**, 7628-7632.
- (5) H. Huo, K. Harms, E. Meggers, *J. Am. Chem. Soc.* 2016, **138**, 6936-6939.
- (6) Y.-J. Zhao, X. Tian, Z.-F. Zhao, J.-X. Pian, S.-W. Li, Asymmetric (3+2) Cycloaddition Employing  $\beta$ -Fluoroalkylated  $\alpha, \beta$ -Unsaturated 2-Acyl Imidazole Catalyzed by a Chiral-at-Metal Rhodium Complex. *Adv. Synth. Catal.* 2024, **366**, 1590-1594.
- (7) S. Zhu, K. Shi, H. Zhu, Z.-K. Jia, X.-F. Xia, D.-W. Wang, L.-H. Zou, Copper-Catalyzed Annulation or Homocoupling of Sulfoxonium Ylides: Synthesis of 2,3-Diaroylquinolines or  $\alpha, \alpha, \beta$ -Tricarbonyl Sulfoxonium Ylides. *Org. Lett.* 2020, **22**, 1504-1509.
